# Supplementary material for: Genomic Variations and Signatures of Selection in Wuhua Yellow Chicken
Source: Preprints.org preprint supplement (doi:10.20944/preprints202006.0089.v1), 2020-06-07
Supplement: Supplementary file 2 [file Table S1.xlsx]

## Sheet: Sheet1
Table S1-Genomic references used for comparison in this study
Sample ID	Breed/population	Symbol	Sex*	Sub-region	Location	Reference	Depth	SRA
GX01	Guangxi Yellow chicken	GX	ND	Southern China	China: Guangxi	huang et al	11.0264	SRR7613984
GX03	Guangxi Yellow chicken	GX	ND	Southern China	China: Guangxi	huang et al	14.6849	SRR7613983
GX04	Guangxi Yellow chicken	GX	ND	Southern China	China: Guangxi	huang et al	11.4163	SRR7613982
GX05	Guangxi Yellow chicken	GX	ND	Southern China	China: Guangxi	huang et al	10.4693	SRR7613981
GX23	Guangxi Yellow chicken	GX	ND	Southern China	China: Guangxi	huang et al	11.9934	SRR7613988
GX24	Guangxi Yellow chicken	GX	ND	Southern China	China: Guangxi	huang et al	10.3394	SRR7613987
GX25	Guangxi Yellow chicken	GX	ND	Southern China	China: Guangxi	huang et al	13.4273	SRR7613986
GX26	Guangxi Yellow chicken	GX	ND	Southern China	China: Guangxi	huang et al	12.5922	SRR7613985
GX28	Guangxi Yellow chicken	GX	ND	Southern China	China: Guangxi	huang et al	13.1877	SRR7613990
GX32	Guangxi Yellow chicken	GX	ND	Southern China	China: Guangxi	huang et al	13.5714	SRR7613989
HT01	Hetian chicken	HT	♀	Southern China	China: Fujian	huang et al	11.9942	SRR7614012
HT02	Hetian chicken	HT	♀	Southern China	China: Fujian	huang et al	11.8469	SRR7614011
HT10	Hetian chicken	HT	♀	Southern China	China: Fujian	huang et al	12.1269	SRR7614014
HT13	Hetian chicken	HT	♀	Southern China	China: Fujian	huang et al	15.3474	SRR7614013
HT15	Hetian chicken	HT	♀	Southern China	China: Fujian	huang et al	15.5405	SRR7614016
HT17	Hetian chicken	HT	♀	Southern China	China: Fujian	huang et al	14.2738	SRR7614015
HT18	Hetian chicken	HT	♀	Southern China	China: Fujian	huang et al	9.73296	SRR7614018
HT22	Hetian chicken	HT	♀	Southern China	China: Fujian	huang et al	12.0665	SRR7614017
HT25	Hetian chicken	HT	♀	Southern China	China: Fujian	huang et al	10.9794	SRR7614020
HT26	Hetian chicken	HT	♀	Southern China	China: Fujian	huang et al	12.8519	SRR7614019
HL02	Huanglang chicken	HL	♀	Southern China	China: Hunan	huang et al	13.7142	SRR7614005
HL03	Huanglang chicken	HL	♀	Southern China	China: Hunan	huang et al	13.6415	SRR7614006
HL04	Huanglang chicken	HL	♀	Southern China	China: Hunan	huang et al	13.5202	SRR7614007
HL06	Huanglang chicken	HL	♀	Southern China	China: Hunan	huang et al	12.7879	SRR7614008
HL10	Huanglang chicken	HL	♀	Southern China	China: Hunan	huang et al	17.2096	SRR7614001
HL13	Huanglang chicken	HL	♂	Southern China	China: Hunan	huang et al	12.1802	SRR7614002
HL16	Huanglang chicken	HL	♂	Southern China	China: Hunan	huang et al	13.1216	SRR7614003
HL28	Huanglang chicken	HL	♀	Southern China	China: Hunan	huang et al	10.3952	SRR7614004
HL30	Huanglang chicken	HL	♀	Southern China	China: Hunan	huang et al	14.6849	SRR7614009
HL46	Huanglang chicken	HL	♀	Southern China	China: Hunan	huang et al	11.3304	SRR7614010
HY01	Huiyang Bearded chicken	HY	♂	Southern China	China: Guangdong	huang et al	11.764	SRR7613996
HY02	Huiyang Bearded chicken	HY	♂	Southern China	China: Guangdong	huang et al	15.0007	SRR7613995
HY03	Huiyang Bearded chicken	HY	♂	Southern China	China: Guangdong	huang et al	11.6043	SRR7613994
HY05	Huiyang Bearded chicken	HY	♂	Southern China	China: Guangdong	huang et al	14.7256	SRR7613993
HY11	Huiyang Bearded chicken	HY	♀	Southern China	China: Guangdong	huang et al	11.9474	SRR7614000
HY12	Huiyang Bearded chicken	HY	♀	Southern China	China: Guangdong	huang et al	14.5188	SRR7613999
HY13	Huiyang Bearded chicken	HY	♀	Southern China	China: Guangdong	huang et al	13.0191	SRR7613998
HY27	Huiyang Bearded chicken	HY	♀	Southern China	China: Guangdong	huang et al	14.1725	SRR7613997
HY29	Huiyang Bearded chicken	HY	♀	Southern China	China: Guangdong	huang et al	12.6343	SRR7613992
HY30	Huiyang Bearded chicken	HY	♀	Southern China	China: Guangdong	huang et al	11.457	SRR7613991
JH26	Jianghan chicken	JH	♀	Southern China	China: Hubei	huang et al	18.663	SRR7613969
JH27	Jianghan chicken	JH	♀	Southern China	China: Hubei	huang et al	12.2571	SRR7613970
JH28	Jianghan chicken	JH	♀	Southern China	China: Hubei	huang et al	11.9422	SRR7613967
JH30	Jianghan chicken	JH	♀	Southern China	China: Hubei	huang et al	12.5417	SRR7613968
JH34	Jianghan chicken	JH	♂	Southern China	China: Hubei	huang et al	12.6358	SRR7613965
JH35	Jianghan chicken	JH	♂	Southern China	China: Hubei	huang et al	10.9208	SRR7613966
JH38	Jianghan chicken	JH	♀	Southern China	China: Hubei	huang et al	9.34013	SRR7613963
JH43	Jianghan chicken	JH	♂	Southern China	China: Hubei	huang et al	11.6177	SRR7613964
JH45	Jianghan chicken	JH	♂	Southern China	China: Hubei	huang et al	10.8514	SRR7613961
JH46	Jianghan chicken	JH	♂	Southern China	China: Hubei	huang et al	11.4521	SRR7613962
ND02	Ningdu Yellow chicken	ND	♀	Southern China	China: Jiangxi	huang et al	10.0972	SRR7613958
ND05	Ningdu Yellow chicken	ND	♀	Southern China	China: Jiangxi	huang et al	10.0998	SRR7613957
ND06	Ningdu Yellow chicken	ND	♀	Southern China	China: Jiangxi	huang et al	10.1413	SRR7613960
ND09	Ningdu Yellow chicken	ND	♀	Southern China	China: Jiangxi	huang et al	11.5956	SRR7613959
ND10	Ningdu Yellow chicken	ND	♀	Southern China	China: Jiangxi	huang et al	10.3272	SRR7613954
ND13	Ningdu Yellow chicken	ND	♀	Southern China	China: Jiangxi	huang et al	10.4527	SRR7613953
ND18	Ningdu Yellow chicken	ND	♀	Southern China	China: Jiangxi	huang et al	16.5665	SRR7613956
ND26	Ningdu Yellow chicken	ND	♀	Southern China	China: Jiangxi	huang et al	13.7402	SRR7613955
ND33	Ningdu Yellow chicken	ND	♀	Southern China	China: Jiangxi	huang et al	10.7448	SRR7613952
ND50	Ningdu Yellow chicken	ND	♂	Southern China	China: Jiangxi	huang et al	12.1417	SRR7613951
WH01	Wuhua Yellow chicken	WH	♂	Southern China	China: Guangdong	huang et al	12.4012	SRR7614051
WH04	Wuhua Yellow chicken	WH	♂	Southern China	China: Guangdong	huang et al	12.7503	SRR7614052
WH05	Wuhua Yellow chicken	WH	♂	Southern China	China: Guangdong	huang et al	14.3402	SRR7614053
WH10	Wuhua Yellow chicken	WH	♀	Southern China	China: Guangdong	huang et al	11.9907	SRR7614054
WH12	Wuhua Yellow chicken	WH	♀	Southern China	China: Guangdong	huang et al	12.6576	SRR7614055
WH17	Wuhua Yellow chicken	WH	♀	Southern China	China: Guangdong	huang et al	17.6651	SRR7614056
WH18	Wuhua Yellow chicken	WH	♀	Southern China	China: Guangdong	huang et al	11.9861	SRR7614057
WH29	Wuhua Yellow chicken	WH	♀	Southern China	China: Guangdong	huang et al	12.8754	SRR7614058
WH38	Wuhua Yellow chicken	WH	♀	Southern China	China: Guangdong	huang et al	11.6375	SRR7614059
WH39	Wuhua Yellow chicken	WH	♀	Southern China	China: Guangdong	huang et al	12.0591	SRR7614060
ZY01	Zhengyang Yellow chicken	ZY	♀	Northern China	China: Henan	huang et al	12.1311	SRR7614048
ZY02	Zhengyang Yellow chicken	ZY	♀	Northern China	China: Henan	huang et al	11.4325	SRR7614047
ZY05	Zhengyang Yellow chicken	ZY	♀	Northern China	China: Henan	huang et al	12.0916	SRR7614046
ZY13	Zhengyang Yellow chicken	ZY	♀	Northern China	China: Henan	huang et al	15.5132	SRR7614045
ZY14	Zhengyang Yellow chicken	ZY	♀	Northern China	China: Henan	huang et al	11.2827	SRR7614044
ZY17	Zhengyang Yellow chicken	ZY	♀	Northern China	China: Henan	huang et al	15.4108	SRR7614043
ZY23	Zhengyang Yellow chicken	ZY	♀	Northern China	China: Henan	huang et al	10.1374	SRR7614042
ZY25	Zhengyang Yellow chicken	ZY	♀	Northern China	China: Henan	huang et al	14.3294	SRR7614041
ZY38	Zhengyang Yellow chicken	ZY	♂	Northern China	China: Henan	huang et al	14.6823	SRR7614050
ZY41	Zhengyang Yellow chicken	ZY	♂	Northern China	China: Henan	huang et al	11.7579	SRR7614049
HB01	Huaibei Partridge chicken	HB	♀	Northern China	China: Anhui	huang et al	9.52608	SRR7614035
HB02	Huaibei Partridge chicken	HB	♀	Northern China	China: Anhui	huang et al	11.9281	SRR7614036
HB06	Huaibei Partridge chicken	HB	♀	Northern China	China: Anhui	huang et al	11.4198	SRR7614033
HB09	Huaibei Partridge chicken	HB	♀	Northern China	China: Anhui	huang et al	12.8839	SRR7614034
HB16	Huaibei Partridge chicken	HB	♀	Northern China	China: Anhui	huang et al	10.9831	SRR7614039
HB27	Huaibei Partridge chicken	HB	♀	Northern China	China: Anhui	huang et al	14.5053	SRR7614040
HBG13	Huaibei Partridge chicken	HB	♂	Northern China	China: Anhui	huang et al	10.6178	SRR7614037
HBG11	Huaibei Partridge chicken	HB	♂	Northern China	China: Anhui	huang et al	14.4219	SRR7614038
HBG12	Huaibei Partridge chicken	HB	♂	Northern China	China: Anhui	huang et al	10.5671	SRR7614031
HBG29	Huaibei Partridge chicken	HB	♂	Northern China	China: Anhui	huang et al	14.9858	SRR7614032
HX01	Huaixiang chicken	HX	♀	Southern China	China: Guangdong	huang et al	13.9468	SRR7614024
HX03	Huaixiang chicken	HX	♀	Southern China	China: Guangdong	huang et al	11.8668	SRR7614023
HX05	Huaixiang chicken	HX	♀	Southern China	China: Guangdong	huang et al	12.8059	SRR7614026
HX13	Huaixiang chicken	HX	♀	Southern China	China: Guangdong	huang et al	13.3582	SRR7614025
HX14	Huaixiang chicken	HX	♀	Southern China	China: Guangdong	huang et al	15.1849	SRR7614028
HX18	Huaixiang chicken	HX	♀	Southern China	China: Guangdong	huang et al	13.7723	SRR7614027
HX20	Huaixiang chicken	HX	♀	Southern China	China: Guangdong	huang et al	11.647	SRR7614030
HX25	Huaixiang chicken	HX	♂	Southern China	China: Guangdong	huang et al	14.3672	SRR7614029
HX28	Huaixiang chicken	HX	♂	Southern China	China: Guangdong	huang et al	12.007	SRR7614022
HX31	Huaixiang chicken	HX	♂	Southern China	China: Guangdong	huang et al	14.2421	SRR7614021
WC23	Wenchang chicken	WC	ND	Southern China	China: Hainan	huang et al	10.8426	SRR7613973
WC25	Wenchang chicken	WC	ND	Southern China	China: Hainan	huang et al	13.2809	SRR7613974
WC26	Wenchang chicken	WC	ND	Southern China	China: Hainan	huang et al	10.5354	SRR7613975
WC27	Wenchang chicken	WC	ND	Southern China	China: Hainan	huang et al	13.1317	SRR7613976
WC28	Wenchang chicken	WC	ND	Southern China	China: Hainan	huang et al	13.085	SRR7613977
WC29	Wenchang chicken	WC	ND	Southern China	China: Hainan	huang et al	11.8839	SRR7613978
WC30	Wenchang chicken	WC	ND	Southern China	China: Hainan	huang et al	14.0336	SRR7613979
WC31	Wenchang chicken	WC	ND	Southern China	China: Hainan	huang et al	12.278	SRR7613980
WC33	Wenchang chicken	WC	ND	Southern China	China: Hainan	huang et al	15.6024	SRR7613971
WC34	Wenchang chicken	WC	ND	Southern China	China: Hainan	huang et al	11.8422	SRR7613972
Average							12.6519
*Note: ♀: female, ♂: male, ND: Not determined.
