# Supplementary material for: Genomic Variations and Signatures of Selection in Wuhua Yellow Chicken
Source: Preprints.org preprint supplement (doi:10.20944/preprints202006.0089.v1), 2020-06-07
Supplement: Supplementary file 3 [file Table S2.xlsx]

## Sheet: Sheet1
Table S2-Base information statistics table before and after quality filtering of the chicken sequenced in this study
Sample	Before Filter					After Filter
	Clean Data(bp)	Q20(%)	Q30(%)	N(%)	GC(%)	HQ Clean Data(bp)	%	Q20	%	Q30	%	N	%	GC	%
A	27691575000 (100.00%)	26604367966 (96.07%)	25347427896 (91.53%)	1897799 (0.01%)	12240415370 (44.20%)	25604499951	1	25104107950	0.9805	24208911302	0.9843	1686012	0.0001	11193795887	0.4372
B	19834410300 (100.00%)	18957293340 (95.58%)	17971284980 (90.61%)	1353052 (0.01%)	8755276496 (44.14%)	18260807345	1	17860200999	0.9781	17165713312	0.94	1192510	0.0001	7972942768	0.4366
C	29365114200 (100.00%)	28176554927 (95.95%)	26792422136 (91.24%)	2016230 (0.01%)	13065775233 (44.49%)	27069412017	1	26509751542	0.9793	25520845017	0.9428	1788360	0.0001	11909736102	0.44
D	23170767300 (100.00%)	22139350450 (95.55%)	20980963935 (90.55%)	1586679 (0.01%)	10418696681 (44.96%)	21380197418	1	20913276189	0.9782	20097041067	0.94	1399257	0.0001	9510249105	0.4448
E	21809489100 (100.00%)	20392485308 (93.50%)	18998478865 (87.11%)	3252240 (0.01%)	9749534139 (44.70%)	19062878253	1	18518030463	0.9714	17649942049	0.9259	2213503	0.0001	8397658588	0.4405
F	24851799900 (100.00%)	23554193620 (94.78%)	22221040567 (89.41%)	5652798 (0.02%)	11212711924 (45.12%)	22418432294	1	21900547557	0.9769	21017781340	0.9375	3697718	0.0002	9992227152	0.4457
G	25959156000 (100.00%)	24651951588 (94.96%)	23335199123 (89.89%)	5874024 (0.02%)	11555325481 (44.51%)	23349942275	1	22849210561	0.9786	21981643357	0.9414	3858946	0.0002	10253309018	0.4391
H	28209289200 (100.00%)	26678938524 (94.58%)	25232324170 (89.45%)	6353546 (0.02%)	12593574981 (44.64%)	24675479566	1	24153817802	0.9789	23247529932	0.9421	4125926	0.0002	10815392726	0.4383
I	26760579300 (100.00%)	25363628133 (94.78%)	23914948147 (89.37%)	6017937 (0.02%)	12097473571 (45.21%)	24247321071	1	23676545168	0.9765	22708697612	0.9365	3973976	0.0002	10823746435	0.4464
J	21598783200 (100.00%)	20690142029 (95.79%)	19840243583 (91.86%)	572552 (0.00%)	9625244845 (44.56%)	19220862364	1	18933993976	0.9851	18390967414	0.9568	218366	0	8418694541	0.438
K	21888675600 (100.00%)	21111894663 (96.45%)	20225485385 (92.40%)	563308 (0.00%)	9809440038 (44.82%)	20437089176	1	20093716691	0.9832	19459162322	0.9521	223357	0	9073785907	0.444
P	25048162500 (100.00%)	24115870414 (96.28%)	23130674053 (92.34%)	651356 (0.00%)	11192391118 (44.68%)	23032594334	1	22671076813	0.9843	21990699148	0.9548	256292	0	10181153001	0.442
Average							1	2.1932e+10	0.97925	21119911156	0.946183	2.05285e+06	0.000108333	9.87856e+09	0.44105
