# Supplementary material for: Genomic Variations and Signatures of Selection in Wuhua Yellow Chicken
Source: Preprints.org preprint supplement (doi:10.20944/preprints202006.0089.v1), 2020-06-07
Supplement: Supplementary file 4 [file Table S3.xlsx]

## Sheet: Sheet1
Table S3-Summary of the average sequencing coverage of all 12 chicken genomes generated in this study
Sample	1X(%)	4X(%)	10X(%)	20X(%)	30X(%)
A	97.31	95.54	87.28	52.13	12.97
B	97.13	94.07	76.79	21.63	1.59
C	97.32	95.67	88.13	56.52	18.24
D	96.94	94.68	82.17	35.26	6.33
E	96.87	94.24	78.49	23.2	2.07
F	97.25	94.68	81.66	38.21	7.97
G	97.31	95.26	84.41	40.91	7.56
H	97.01	95.31	86.61	43.53	8.5
I	97.31	94.89	82.97	41.89	9.68
J	96.91	94.66	79.34	23.8	2.43
K	97.06	93.87	78.01	28.28	3.57
P	96.99	95.19	86.27	41.6	7.27
Average	97.1175	94.8383	82.6775	37.2467	7.34833
