# Supplementary material for: Genomic Variations and Signatures of Selection in Wuhua Yellow Chicken
Source: Preprints.org preprint supplement (doi:10.20944/preprints202006.0089.v1), 2020-06-07
Supplement: Supplementary file 5 [file Table S4.xlsx]

## Sheet: Table-S6
Table S4-Individual transition and transvesion SNPs statistics of 12 chickens sequenced in this study
Sample	ts	tv	ts/tv	novel_ts	novel_tv	novel_ts/novel_tv
A	3836643	1537936	2.4947	294239	129558	2.2711
B	3788220	1515222	2.5001	283921	123891	2.2917
C	3825159	1531820	2.4971	289112	127359	2.2701
D	3862102	1545749	2.4985	287833	127031	2.2658
E	3835957	1535762	2.4978	277458	121784	2.2783
F	3763786	1505865	2.4994	280499	122751	2.2851
G	3792153	1517665	2.4987	296282	129726	2.2839
H	3854524	1545665	2.4938	276368	121371	2.2771
I	3811854	1524732	2.5	290289	127061	2.2846
J	3837666	1537882	2.4954	281322	124368	2.262
K	3637260	1452883	2.5035	272195	119664	2.2747
P	3859316	1547289	2.4942	294726	129591	2.2743
Average	3808720	1.52487e+06	2.49777	285354	125346	2.27656
