# Supplementary material for: Genomic Variations and Signatures of Selection in Wuhua Yellow Chicken
Source: Preprints.org preprint supplement (doi:10.20944/preprints202006.0089.v1), 2020-06-07
Supplement: Supplementary file 6 [file Table S5.xlsx]

## Sheet: Sheet1
Table S5-Annotation of the hybrid status of SNPs in each chicken genome sequenced in this study
Sample	Hom	Het	Novel_Hom	Novel_Het
A	2176610	3197969	65110	358687
B	2192533	3110909	60631	347181
C	2200229	3156750	65265	351206
D	2124231	3283620	56840	358024
E	2133747	3237972	57098	342144
F	2227979	3041672	67345	335905
G	2203600	3106218	64076	361932
H	2137082	3263107	55401	342338
I	2194227	3142359	60211	357139
J	2143949	3231599	59448	346242
K	2385275	2704868	83281	308578
P	2101392	3305213	57172	367145
Average	2.18507e+06	3.14852e+06	62656.5	348043
