# Supplementary material for: Genomic Variations and Signatures of Selection in Wuhua Yellow Chicken
Source: Preprints.org preprint supplement (doi:10.20944/preprints202006.0089.v1), 2020-06-07
Supplement: Supplementary file 7 [file Table S6.xlsx]

## Sheet: a
Table S6a-The putative locus and candidate genes of WHCY (SG vs. WHCY)
GeneID	Symbol	Description	KEGG_A_class	KEGG_B_class	Pathway	K_ID	GO Component	GO Function	GO Process
ENSGALG00000005862	SBSPO	RPE-spondin-like precursor [Gallus gallus]	-	-	-	-	-	GO:0005488//binding;GO:0001871//pattern binding	GO:0002376//immune system process
ENSGALG00000005885	DGC14	PREDICTED: protein DGCR14 [Gallus gallus]	-	-	-	-	GO:0044464//cell part;GO:0005623//cell;GO:0032991//macromolecular complex;GO:0043231//intracellular membrane-bounded organelle;GO:0043229//intracellular organelle;GO:1990904//ribonucleoprotein complex;GO:0005681//spliceosomal complex;GO:0043226//organelle;GO:0005622//intracellular;GO:0005634//nucleus;GO:0044424//intracellular part;GO:0044446//intracellular organelle part;GO:0030529//intracellular…	-	GO:0032502//developmental process;GO:0044767//single-organism developmental process;GO:0007275//multicellular organism development;GO:0032501//multicellular organismal process;GO:0048731//system development;GO:0044699//single-organism process;GO:0048856//anatomical structure development;GO:0044707//single-multicellular organism process
ENSGALG00000016231	DDX3X	ATP-dependent RNA helicase DDX3X [Gallus gallus]	Organismal Systems	Immune system	ko04622//RIG-I-like receptor signaling pathway	K11594	-	GO:0032549//ribonucleoside binding;GO:0005488//binding;GO:0042623//ATPase activity, coupled;GO:1901363//heterocyclic compound binding;GO:0001883//purine nucleoside binding;GO:0017111//nucleoside-triphosphatase activity;GO:0032550//purine ribonucleoside binding;GO:0016787//hydrolase activity;GO:0016887//ATPase activity;GO:0003824//catalytic activity;GO:0016462//pyrophosphatase activity;GO:0001882/…	-
ENSGALG00000042482	RAB5B	ras-related protein Rab-5B [Gallus gallus]	Cellular Processes	Transport and catabolism	ko04144//Endocytosis;ko04145//Phagosome	K07888	GO:0005769//early endosome;GO:0044444//cytoplasmic part;GO:0043227//membrane-bounded organelle;GO:0043226//organelle;GO:0005623//cell;GO:0044464//cell part;GO:0043229//intracellular organelle;GO:0005622//intracellular;GO:0031982//vesicle;GO:0005737//cytoplasm;GO:0043231//intracellular membrane-bounded organelle;GO:0031988//membrane-bounded vesicle;GO:0016023//cytoplasmic, membrane-bounded vesicle…	GO:0032550//purine ribonucleoside binding;GO:0097159//organic cyclic compound binding;GO:0036094//small molecule binding;GO:0001883//purine nucleoside binding;GO:1901363//heterocyclic compound binding;GO:0005488//binding;GO:0032549//ribonucleoside binding;GO:0097367//carbohydrate derivative binding;GO:0005515//protein binding;GO:0001882//nucleoside binding	GO:0051716//cellular response to stimulus;GO:0008104//protein localization;GO:0050896//response to stimulus;GO:0006996//organelle organization;GO:0044700//single organism signaling;GO:0033036//macromolecule localization;GO:0051179//localization;GO:0007154//cell communication;GO:0009987//cellular process;GO:0044763//single-organism cellular process;GO:0050789//regulation of biological process;GO:0…
ENSGALG00000027761	TFIP8	PREDICTED: tumor necrosis factor alpha-induced protein 8 isoform X1 [Meleagris gallopavo]	-	-	-	-	GO:0044464//cell part;GO:0005623//cell;GO:0005622//intracellular;GO:0044424//intracellular part	GO:0030234//enzyme regulator activity;GO:0061134//peptidase regulator activity;GO:0030414//peptidase inhibitor activity;GO:0004869//cysteine-type endopeptidase inhibitor activity;GO:0004857//enzyme inhibitor activity;GO:0061135//endopeptidase regulator activity;GO:0098772//molecular function regulator;GO:0004866//endopeptidase inhibitor activity	GO:0044763//single-organism cellular process;GO:0008219//cell death;GO:0009987//cellular process;GO:0044699//single-organism process;GO:0012501//programmed cell death;GO:0006915//apoptotic process;GO:0016265//death
ENSGALG00000014218	PF21B	PREDICTED: PHD finger protein 21B isoform X3 [Gallus gallus]	-	-	-	-	-	-	-
ENSGALG00000008229	AL7A1	PREDICTED: alpha-aminoadipic semialdehyde dehydrogenase isoform 2 [Gallus gallus]	Metabolism	Global and Overview;Carbohydrate metabolism;Lipid metabolism;Amino acid metabolism;Metabolism of other amino acids	ko01100//Metabolic pathways;ko01110//Biosynthesis of secondary metabolites;ko01130//Biosynthesis of antibiotics;ko01120//Microbial metabolism in diverse environments;ko01230//Biosynthesis of amino acids;ko00561//Glycerolipid metabolism;ko00010//Glycolysis / Gluconeogenesis;ko00280//Valine, leucine and isoleucine degradation;ko00310//Lysine degradation;ko00330//Arginine and proline metabolism;ko00…	K14085	GO:0043231//intracellular membrane-bounded organelle;GO:0005623//cell;GO:0043229//intracellular organelle;GO:0005622//intracellular;GO:0043226//organelle;GO:0044464//cell part;GO:0005737//cytoplasm;GO:0044444//cytoplasmic part;GO:0044424//intracellular part;GO:0043227//membrane-bounded organelle	GO:0016491//oxidoreductase activity;GO:0003824//catalytic activity;GO:0004029//aldehyde dehydrogenase (NAD) activity;GO:0016620//oxidoreductase activity, acting on the aldehyde or oxo group of donors, NAD or NADP as acceptor;GO:0016903//oxidoreductase activity, acting on the aldehyde or oxo group of donors	GO:1901615//organic hydroxy compound metabolic process;GO:0044763//single-organism cellular process;GO:0044281//small molecule metabolic process;GO:0044106//cellular amine metabolic process;GO:0042439//ethanolamine-containing compound metabolic process;GO:0006066//alcohol metabolic process;GO:0006807//nitrogen compound metabolic process;GO:0019695//choline metabolic process;GO:0044237//cellular m…
ENSGALG00000015496	CHM2B	charged multivesicular body protein 2b [Gallus gallus]	Cellular Processes	Transport and catabolism	ko04144//Endocytosis	K12192	GO:0044444//cytoplasmic part;GO:0043229//intracellular organelle;GO:0005770//late endosome;GO:0044464//cell part;GO:0043227//membrane-bounded organelle;GO:0005623//cell;GO:0044424//intracellular part;GO:0043231//intracellular membrane-bounded organelle;GO:0005622//intracellular;GO:0043226//organelle;GO:0005768//endosome;GO:0005737//cytoplasm;GO:0012505//endomembrane system	GO:0005515//protein binding;GO:0005488//binding	GO:0008104//protein localization;GO:0051179//localization;GO:0045184//establishment of protein localization;GO:0051234//establishment of localization;GO:0033036//macromolecule localization
ENSGALG00000027875	IFNA1	PREDICTED: interferon type A1/A2-like [Gallus gallus]	Environmental Information Processing;Organismal Systems;Cellular Processes;Human Diseases	Signal transduction;Signaling molecules and interaction;Transport and catabolism;Infectious diseases;Immune system	ko04060//Cytokine-cytokine receptor interaction;ko05168//Herpes simplex infection;ko05164//Influenza A;ko04630//Jak-STAT signaling pathway;ko04620//Toll-like receptor signaling pathway;ko04622//RIG-I-like receptor signaling pathway;ko04623//Cytosolic DNA-sensing pathway;ko04140//Regulation of autophagy	K05414	-	-	-
ENSGALG00000046115	ADCYA	PREDICTED: adenylate cyclase type 10-like isoform X5 [Gallus gallus]	Metabolism	Nucleotide metabolism	ko00230//Purine metabolism	K11265	-	GO:0003824//catalytic activity;GO:0016829//lyase activity	GO:0051716//cellular response to stimulus;GO:0050794//regulation of cellular process;GO:0050896//response to stimulus;GO:0023052//signaling;GO:0044763//single-organism cellular process;GO:0044699//single-organism process;GO:0009987//cellular process;GO:0044700//single organism signaling;GO:0007165//signal transduction;GO:0007154//cell communication;GO:0065007//biological regulation;GO:0050789//re…
ENSGALG00000045363	IFNA1	PREDICTED: interferon type A1/A2-like [Gallus gallus]	Human Diseases;Environmental Information Processing;Organismal Systems;Cellular Processes	Infectious diseases;Transport and catabolism;Immune system;Signal transduction;Signaling molecules and interaction	ko04060//Cytokine-cytokine receptor interaction;ko05168//Herpes simplex infection;ko05164//Influenza A;ko04630//Jak-STAT signaling pathway;ko04620//Toll-like receptor signaling pathway;ko04622//RIG-I-like receptor signaling pathway;ko04623//Cytosolic DNA-sensing pathway;ko04140//Regulation of autophagy	K05414	-	-	-
ENSGALG00000014213	PRR5	proline-rich protein 5 [Gallus gallus]	-	-	-	-	GO:0005623//cell;GO:0005622//intracellular;GO:0044464//cell part;GO:0044424//intracellular part;GO:0038201//TOR complex	-	GO:0051246//regulation of protein metabolic process;GO:0023052//signaling;GO:0044699//single-organism process;GO:0048017//inositol lipid-mediated signaling;GO:0019220//regulation of phosphate metabolic process;GO:0007165//signal transduction;GO:0031399//regulation of protein modification process;GO:0032268//regulation of cellular protein metabolic process;GO:0019222//regulation of metabolic proce…
ENSGALG00000016228	NYX	PREDICTED: nyctalopin isoform X4 [Gallus gallus]	-	-	-	-	-	-	GO:0050953//sensory perception of light stimulus;GO:0032501//multicellular organismal process;GO:0007600//sensory perception;GO:0003008//system process;GO:0050877//neurological system process
ENSGALG00000015684	DJC25	PREDICTED: dnaJ homolog subfamily C member 25 [Gallus gallus]	-	-	-	-	-	-	-
ENSGALG00000040266	GLI3	transcriptional activator GLI3 [Gallus gallus]	Environmental Information Processing	Signal transduction	ko04340//Hedgehog signaling pathway	K06230	GO:0044428//nuclear part;GO:0044446//intracellular organelle part;GO:0031981//nuclear lumen;GO:0005623//cell;GO:0031974//membrane-enclosed lumen;GO:0043227//membrane-bounded organelle;GO:0005622//intracellular;GO:0043233//organelle lumen;GO:0044444//cytoplasmic part;GO:0044451//nucleoplasm part;GO:0032991//macromolecular complex;GO:0043231//intracellular membrane-bounded organelle;GO:0044464//cel…	GO:0001071//nucleic acid binding transcription factor activity;GO:0005515//protein binding;GO:0003677//DNA binding;GO:0043167//ion binding;GO:0097159//organic cyclic compound binding;GO:1901363//heterocyclic compound binding;GO:0043169//cation binding;GO:0003676//nucleic acid binding;GO:0019899//enzyme binding;GO:0005488//binding	GO:0007420//brain development;GO:0051251//positive regulation of lymphocyte activation;GO:1903707//negative regulation of hemopoiesis;GO:0043009//chordate embryonic development;GO:0030178//negative regulation of Wnt signaling pathway;GO:0042476//odontogenesis;GO:0007423//sensory organ development;GO:0048663//neuron fate commitment;GO:0045619//regulation of lymphocyte differentiation;GO:0034613//c…
ENSGALG00000015889	PHIP	PREDICTED: PH-interacting protein isoform X1 [Aquila chrysaetos canadensis]	-	-	-	-	-	GO:0005515//protein binding;GO:0005102//receptor binding;GO:0005488//binding	GO:0065007//biological regulation;GO:0007167//enzyme linked receptor protein signaling pathway;GO:0007165//signal transduction;GO:0044763//single-organism cellular process;GO:0044699//single-organism process;GO:0044700//single organism signaling;GO:0007166//cell surface receptor signaling pathway;GO:0007169//transmembrane receptor protein tyrosine kinase signaling pathway;GO:0009987//cellular pro…
ENSGALG00000011244	DLK1	protein delta homolog 1 precursor [Gallus gallus]	-	-	-	-	GO:0071944//cell periphery;GO:0044464//cell part;GO:0005886//plasma membrane;GO:0005623//cell;GO:0016020//membrane	GO:0046872//metal ion binding;GO:0005488//binding;GO:0043169//cation binding;GO:0043167//ion binding	GO:0007275//multicellular organism development;GO:0032501//multicellular organismal process;GO:0044699//single-organism process;GO:0044700//single organism signaling;GO:0007165//signal transduction;GO:0050896//response to stimulus;GO:0023052//signaling;GO:0007154//cell communication;GO:0050789//regulation of biological process;GO:0001501//skeletal system development;GO:0048731//system development…
ENSGALG00000011465	STT3B	PREDICTED: dolichyl-diphosphooligosaccharide--protein glycosyltransferase subunit STT3B [Pseudopodoces humilis]	Genetic Information Processing;Metabolism	Folding, sorting and degradation;Global and Overview;Glycan biosynthesis and metabolism	ko01100//Metabolic pathways;ko04141//Protein processing in endoplasmic reticulum;ko00510//N-Glycan biosynthesis	K07151	GO:0031090//organelle membrane;GO:0043226//organelle;GO:0044424//intracellular part;GO:0043229//intracellular organelle;GO:0042175//nuclear outer membrane-endoplasmic reticulum membrane network;GO:0016020//membrane;GO:0098588//bounding membrane of organelle;GO:0005783//endoplasmic reticulum;GO:0005623//cell;GO:0044425//membrane part;GO:0044444//cytoplasmic part;GO:0044422//organelle part;GO:00056…	GO:0003824//catalytic activity;GO:0004576//oligosaccharyl transferase activity;GO:0016757//transferase activity, transferring glycosyl groups;GO:0016758//transferase activity, transferring hexosyl groups;GO:0016740//transferase activity	GO:0008152//metabolic process;GO:0005975//carbohydrate metabolic process;GO:0006508//proteolysis;GO:0006511//ubiquitin-dependent protein catabolic process;GO:0009059//macromolecule biosynthetic process;GO:1901137//carbohydrate derivative biosynthetic process;GO:0044249//cellular biosynthetic process;GO:0043161//proteasome-mediated ubiquitin-dependent protein catabolic process;GO:0050896//response…
ENSGALG00000019300	TY3H	PREDICTED: tyrosine 3-monooxygenase-like [Gallus gallus]	Metabolism	Global and Overview;Amino acid metabolism	ko01100//Metabolic pathways;ko00350//Tyrosine metabolism	K00501	-	GO:0043167//ion binding;GO:0003824//catalytic activity;GO:0046914//transition metal ion binding;GO:0046872//metal ion binding;GO:0016491//oxidoreductase activity;GO:0004497//monooxygenase activity;GO:0005488//binding;GO:0043169//cation binding	GO:0043436//oxoacid metabolic process;GO:0006520//cellular amino acid metabolic process;GO:0006807//nitrogen compound metabolic process;GO:0044710//single-organism metabolic process;GO:0044238//primary metabolic process;GO:0044237//cellular metabolic process;GO:0044281//small molecule metabolic process;GO:0009987//cellular process;GO:1901564//organonitrogen compound metabolic process;GO:0019752//…
ENSGALG00000043112	RPB1	PREDICTED: LOW QUALITY PROTEIN: DNA-directed RNA polymerase II subunit RPB1-like [Latimeria chalumnae]	Human Diseases;Metabolism;Genetic Information Processing	Infectious diseases;Transcription;Global and Overview;Nucleotide metabolism	ko01100//Metabolic pathways;ko05168//Herpes simplex infection;ko00230//Purine metabolism;ko00240//Pyrimidine metabolism;ko03020//RNA polymerase	K03006	-	-	-
ENSGALG00000013102	COBL	PREDICTED: protein cordon-bleu isoform X7 [Gallus gallus]	-	-	-	-	-	GO:0005488//binding;GO:0004871//signal transducer activity;GO:0005515//protein binding;GO:0008092//cytoskeletal protein binding	GO:0009987//cellular process;GO:0051716//cellular response to stimulus;GO:0065007//biological regulation;GO:0044700//single organism signaling;GO:0044699//single-organism process;GO:0044763//single-organism cellular process;GO:0007154//cell communication;GO:0050896//response to stimulus;GO:0050794//regulation of cellular process;GO:0007165//signal transduction;GO:0050789//regulation of biological…
ENSGALG00000013809	UBAP2	AD012Z protein [Gallus gallus]	-	-	-	-	-	-	-
ENSGALG00000036693	RHG22	PREDICTED: rho GTPase-activating protein 22 isoform X12 [Gallus gallus]	-	-	-	-	GO:0044464//cell part;GO:0005623//cell	GO:0008047//enzyme activator activity;GO:0030234//enzyme regulator activity;GO:0098772//molecular function regulator	GO:0019222//regulation of metabolic process;GO:0050789//regulation of biological process;GO:0065007//biological regulation;GO:0007154//cell communication;GO:0043087//regulation of GTPase activity;GO:0050790//regulation of catalytic activity;GO:0051336//regulation of hydrolase activity;GO:0009987//cellular process;GO:0065009//regulation of molecular function;GO:0044763//single-organism cellular pr…
ENSGALG00000044725	IFNA1	PREDICTED: interferon type A1/A2-like [Gallus gallus]	Human Diseases;Cellular Processes;Organismal Systems;Environmental Information Processing	Signaling molecules and interaction;Signal transduction;Transport and catabolism;Immune system;Infectious diseases	ko04060//Cytokine-cytokine receptor interaction;ko05168//Herpes simplex infection;ko05164//Influenza A;ko04630//Jak-STAT signaling pathway;ko04620//Toll-like receptor signaling pathway;ko04622//RIG-I-like receptor signaling pathway;ko04623//Cytosolic DNA-sensing pathway;ko04140//Regulation of autophagy	K05414	-	-	-
ENSGALG00000031702	KMT2D	PREDICTED: LOW QUALITY PROTEIN: histone-lysine N-methyltransferase MLL2, partial [Gallus gallus]	Metabolism	Amino acid metabolism	ko00310//Lysine degradation	K09187	-	GO:0043169//cation binding;GO:0005488//binding;GO:0046872//metal ion binding;GO:0016740//transferase activity;GO:0003824//catalytic activity;GO:0043167//ion binding	GO:0051716//cellular response to stimulus;GO:0007165//signal transduction;GO:0043170//macromolecule metabolic process;GO:0008152//metabolic process;GO:0007154//cell communication;GO:0009987//cellular process;GO:0023052//signaling;GO:0044238//primary metabolic process;GO:0050789//regulation of biological process;GO:0050896//response to stimulus;GO:0044763//single-organism cellular process;GO:00442…
ENSGALG00000011283	Z385D	PREDICTED: zinc finger protein 385D [Aptenodytes forsteri]	-	-	-	-	-	GO:0043169//cation binding;GO:0005488//binding;GO:0046872//metal ion binding;GO:0046914//transition metal ion binding;GO:0043167//ion binding;GO:0097159//organic cyclic compound binding	-
ENSGALG00000011522	TRM61	PREDICTED: tRNA (adenine(58)-N(1))-methyltransferase catalytic subunit TRMT61A isoform X3 [Gallus gallus]	-	-	-	-	GO:0044444//cytoplasmic part;GO:0005737//cytoplasm;GO:1902494//catalytic complex;GO:1990234//transferase complex;GO:0034708//methyltransferase complex;GO:0043527//tRNA methyltransferase complex;GO:0044464//cell part;GO:0032991//macromolecular complex;GO:0043234//protein complex;GO:0005623//cell;GO:0044424//intracellular part;GO:0005622//intracellular	GO:0003824//catalytic activity;GO:0008173//RNA methyltransferase activity;GO:0016741//transferase activity, transferring one-carbon groups;GO:0008757//S-adenosylmethionine-dependent methyltransferase activity;GO:0008175//tRNA methyltransferase activity;GO:0016740//transferase activity;GO:0016426//tRNA (adenine) methyltransferase activity;GO:0008168//methyltransferase activity	GO:0009987//cellular process;GO:0008152//metabolic process;GO:0044237//cellular metabolic process;GO:0043414//macromolecule methylation;GO:0044260//cellular macromolecule metabolic process;GO:1901360//organic cyclic compound metabolic process;GO:0016070//RNA metabolic process;GO:0006807//nitrogen compound metabolic process;GO:0009451//RNA modification;GO:0043170//macromolecule metabolic process;G…
ENSGALG00000008469	SPIT1	PREDICTED: kunitz-type protease inhibitor 1 isoform X3 [Gallus gallus]	-	-	-	-	-	GO:0030414//peptidase inhibitor activity;GO:0016787//hydrolase activity;GO:0004857//enzyme inhibitor activity;GO:0061135//endopeptidase regulator activity;GO:0030234//enzyme regulator activity;GO:0061134//peptidase regulator activity;GO:0003824//catalytic activity;GO:0004866//endopeptidase inhibitor activity;GO:0098772//molecular function regulator	GO:0045861//negative regulation of proteolysis;GO:0030162//regulation of proteolysis;GO:0048856//anatomical structure development;GO:0044699//single-organism process;GO:0050790//regulation of catalytic activity;GO:0043009//chordate embryonic development;GO:0032269//negative regulation of cellular protein metabolic process;GO:0048519//negative regulation of biological process;GO:0072358//cardiovas…
ENSGALG00000004728	RGL1	ral guanine nucleotide dissociation stimulator-like 1 [Gallus gallus]	-	-	-	-	GO:0044464//cell part;GO:0005623//cell	-	GO:0050794//regulation of cellular process;GO:0044700//single organism signaling;GO:0035556//intracellular signal transduction;GO:0007165//signal transduction;GO:0051716//cellular response to stimulus;GO:0044763//single-organism cellular process;GO:0050789//regulation of biological process;GO:0007264//small GTPase mediated signal transduction;GO:0044699//single-organism process;GO:0023052//signal…
ENSGALG00000005824	SUSD2	PREDICTED: sushi domain-containing protein 2 [Gallus gallus]	-	-	-	-	-	-	-
ENSGALG00000007948	LRC4C	PREDICTED: leucine-rich repeat-containing protein 4C isoform X3 [Gallus gallus]	Environmental Information Processing	Signaling molecules and interaction	ko04514//Cell adhesion molecules (CAMs)	K07523	GO:0016020//membrane;GO:0044425//membrane part;GO:0031224//intrinsic component of membrane	-	GO:0048468//cell development;GO:0032501//multicellular organismal process;GO:0016043//cellular component organization;GO:0030030//cell projection organization;GO:0009987//cellular process;GO:0000904//cell morphogenesis involved in differentiation;GO:0030154//cell differentiation;GO:0044699//single-organism process;GO:0022008//neurogenesis;GO:0007275//multicellular organism development;GO:0048812/…
ENSGALG00000010259	COSA1	PREDICTED: collagen alpha-1(XXVIII) chain [Gallus gallus]	-	-	-	-	-	-	-
ENSGALG00000036282	AAKG1	5'-AMP-activated protein kinase gamma-1 non-catalytic subunit variant 1 [Gallus gallus]	Environmental Information Processing;Organismal Systems;Human Diseases	Signal transduction;Endocrine and metabolic diseases;Endocrine system	ko04068//FoxO signaling pathway;ko04910//Insulin signaling pathway;ko04931//Insulin resistance;ko04920//Adipocytokine signaling pathway	K07200	GO:0044464//cell part;GO:0043227//membrane-bounded organelle;GO:0005622//intracellular;GO:0043229//intracellular organelle;GO:0044424//intracellular part;GO:0005623//cell;GO:0043231//intracellular membrane-bounded organelle;GO:0043226//organelle	GO:0097159//organic cyclic compound binding;GO:1901265//nucleoside phosphate binding;GO:0017076//purine nucleotide binding;GO:0036094//small molecule binding;GO:1901363//heterocyclic compound binding;GO:0000166//nucleotide binding;GO:0005488//binding	GO:0044267//cellular protein metabolic process;GO:0006464//cellular protein modification process;GO:0036211//protein modification process;GO:0010467//gene expression;GO:0071704//organic substance metabolic process;GO:0009987//cellular process;GO:0019538//protein metabolic process;GO:0043412//macromolecule modification;GO:0044238//primary metabolic process;GO:0044260//cellular macromolecule metabo…
ENSGALG00000015770	A4	amyloid beta A4 protein precursor [Gallus gallus]	-	-	-	-	GO:0043227//membrane-bounded organelle;GO:0043228//non-membrane-bounded organelle;GO:0043226//organelle;GO:0016020//membrane;GO:0005856//cytoskeleton;GO:0043232//intracellular non-membrane-bounded organelle;GO:0097458//neuron part;GO:0005623//cell;GO:0042995//cell projection;GO:0044424//intracellular part;GO:0005819//spindle;GO:0031982//vesicle;GO:0044430//cytoskeletal part;GO:0044444//cytoplasmi…	GO:0030234//enzyme regulator activity;GO:0005539//glycosaminoglycan binding;GO:0005102//receptor binding;GO:0005515//protein binding;GO:0004866//endopeptidase inhibitor activity;GO:0061134//peptidase regulator activity;GO:0098772//molecular function regulator;GO:0043167//ion binding;GO:0046872//metal ion binding;GO:0004857//enzyme inhibitor activity;GO:0061135//endopeptidase regulator activity;GO…	GO:0050801//ion homeostasis;GO:0006935//chemotaxis;GO:0048469//cell maturation;GO:0032774//RNA biosynthetic process;GO:0006807//nitrogen compound metabolic process;GO:0044770//cell cycle phase transition;GO:0031123//RNA 3'-end processing;GO:0051716//cellular response to stimulus;GO:0044703//multi-organism reproductive process;GO:0090304//nucleic acid metabolic process;GO:0009653//anatomical struc…
ENSGALG00000032030	EGFLA	PREDICTED: pikachurin isoform X3 [Gallus gallus]	-	-	-	-	GO:0005576//extracellular region;GO:0031012//extracellular matrix;GO:0005578//proteinaceous extracellular matrix;GO:0044421//extracellular region part	GO:0005488//binding;GO:0097367//carbohydrate derivative binding	GO:0071840//cellular component organization or biogenesis;GO:0018149//peptide cross-linking;GO:0030155//regulation of cell adhesion;GO:0050789//regulation of biological process;GO:0043062//extracellular structure organization;GO:0019538//protein metabolic process;GO:0036211//protein modification process;GO:0044260//cellular macromolecule metabolic process;GO:0044237//cellular metabolic process;GO…
ENSGALG00000004782	SEN15	PREDICTED: tRNA-splicing endonuclease subunit Sen15 isoformX2 [Gallus gallus]	-	-	-	-	-	GO:0016788//hydrolase activity, acting on ester bonds;GO:0003824//catalytic activity;GO:0016787//hydrolase activity;GO:0004549//tRNA-specific ribonuclease activity;GO:0004540//ribonuclease activity;GO:0004518//nuclease activity	GO:0006725//cellular aromatic compound metabolic process;GO:0008380//RNA splicing;GO:0016070//RNA metabolic process;GO:0044237//cellular metabolic process;GO:0046483//heterocycle metabolic process;GO:0010467//gene expression;GO:0090305//nucleic acid phosphodiester bond hydrolysis;GO:0044238//primary metabolic process;GO:0008152//metabolic process;GO:0090304//nucleic acid metabolic process;GO:0000…
ENSGALG00000005846	MPDZ	multiple PDZ domain protein [Gallus gallus]	Cellular Processes	Cellular commiunity	ko04530//Tight junction	K06095	GO:0044464//cell part;GO:0043218//compact myelin;GO:0005623//cell;GO:0031982//vesicle;GO:0005886//plasma membrane;GO:0016020//membrane;GO:0043226//organelle;GO:0071944//cell periphery;GO:0043209//myelin sheath	GO:0005488//binding;GO:0005515//protein binding	GO:0022610//biological adhesion
ENSGALG00000009655	AADAT	PREDICTED: kynurenine/alpha-aminoadipate aminotransferase, mitochondrial isoform X5 [Gallus gallus]	Metabolism	Amino acid metabolism;Global and Overview	ko01100//Metabolic pathways;ko01130//Biosynthesis of antibiotics;ko01230//Biosynthesis of amino acids;ko00310//Lysine degradation;ko00380//Tryptophan metabolism;ko01210//2-Oxocarboxylic acid metabolism;ko00300//Lysine biosynthesis	K00825	GO:0005622//intracellular;GO:0005623//cell;GO:0044464//cell part;GO:0044424//intracellular part;GO:0043227//membrane-bounded organelle;GO:0043229//intracellular organelle;GO:0043231//intracellular membrane-bounded organelle;GO:0043226//organelle	GO:0003824//catalytic activity;GO:0046983//protein dimerization activity;GO:0005488//binding;GO:0016740//transferase activity;GO:0036137//kynurenine aminotransferase activity;GO:0016769//transferase activity, transferring nitrogenous groups;GO:0005515//protein binding;GO:0008483//transaminase activity;GO:0043168//anion binding;GO:0043167//ion binding	GO:0043436//oxoacid metabolic process;GO:0044710//single-organism metabolic process;GO:0006520//cellular amino acid metabolic process;GO:1901605//alpha-amino acid metabolic process;GO:0019752//carboxylic acid metabolic process;GO:0042537//benzene-containing compound metabolic process;GO:1901564//organonitrogen compound metabolic process;GO:1901360//organic cyclic compound metabolic process;GO:000…
ENSGALG00000014786	P85A	PREDICTED: phosphatidylinositol 3-kinase regulatory subunit alpha isoform X4 [Gallus gallus]	Cellular Processes;Environmental Information Processing;Organismal Systems;Human Diseases	Cellular commiunity;Sensory system;Aging;Endocrine system;Nervous system;Endocrine and metabolic diseases;Infectious diseases;Immune system;Cancers;Digestive system;Cell growth and death;Circulatory system;Excretory system;Signal transduction;Cell motility;Development	ko04510//Focal adhesion;ko04810//Regulation of actin cytoskeleton;ko05164//Influenza A;ko04630//Jak-STAT signaling pathway;ko04261//Adrenergic signaling in cardiomyocytes;ko04068//FoxO signaling pathway;ko04910//Insulin signaling pathway;ko04933//AGE-RAGE signaling pathway in diabetic complications;ko04931//Insulin resistance;ko04620//Toll-like receptor signaling pathway;ko04070//Phosphatidylinos…	K02649	GO:0044445//cytosolic part;GO:0005737//cytoplasm;GO:0044444//cytoplasmic part;GO:0005622//intracellular;GO:0044464//cell part;GO:0005623//cell;GO:0005829//cytosol;GO:0044424//intracellular part	GO:0030234//enzyme regulator activity;GO:0017046//peptide hormone binding;GO:0098772//molecular function regulator;GO:0005126//cytokine receptor binding;GO:0033218//amide binding;GO:0005167//neurotrophin TRK receptor binding;GO:0005102//receptor binding;GO:0019899//enzyme binding;GO:0042562//hormone binding;GO:0042277//peptide binding;GO:0005488//binding;GO:0005165//neurotrophin receptor binding;…	GO:0044260//cellular macromolecule metabolic process;GO:1903706//regulation of hemopoiesis;GO:0051093//negative regulation of developmental process;GO:0042991//transcription factor import into nucleus;GO:0006810//transport;GO:0007169//transmembrane receptor protein tyrosine kinase signaling pathway;GO:0044249//cellular biosynthetic process;GO:0048015//phosphatidylinositol-mediated signaling;GO:00…
ENSGALG00000005509	DPYD	PREDICTED: dihydropyrimidine dehydrogenase [NADP(+)] isoform X2 [Gallus gallus]	Metabolism	Metabolism of cofactors and vitamins;Nucleotide metabolism;Global and Overview;Xenobiotics biodegradation and metabolism;Metabolism of other amino acids	ko01100//Metabolic pathways;ko00240//Pyrimidine metabolism;ko00983//Drug metabolism - other enzymes;ko00410//beta-Alanine metabolism;ko00770//Pantothenate and CoA biosynthesis	K00207	GO:0005623//cell;GO:0005622//intracellular;GO:0005737//cytoplasm;GO:0044424//intracellular part;GO:0044444//cytoplasmic part;GO:0044464//cell part	GO:0003824//catalytic activity;GO:0005488//binding;GO:0016635//oxidoreductase activity, acting on the CH-CH group of donors, quinone or related compound as acceptor;GO:0051540//metal cluster binding;GO:0004152//dihydroorotate dehydrogenase activity;GO:0016627//oxidoreductase activity, acting on the CH-CH group of donors;GO:0016491//oxidoreductase activity	GO:0034641//cellular nitrogen compound metabolic process;GO:0006753//nucleoside phosphate metabolic process;GO:0072527//pyrimidine-containing compound metabolic process;GO:0046700//heterocycle catabolic process;GO:0009156//ribonucleoside monophosphate biosynthetic process;GO:1901575//organic substance catabolic process;GO:0006208//pyrimidine nucleobase catabolic process;GO:0009174//pyrimidine rib…
ENSGALG00000026279	COMD8	COMM domain-containing protein 8 [Gallus gallus]	-	-	-	-	-	-	-
ENSGALG00000025984	IFNA1	interferon type A1/A2 precursor [Gallus gallus]	Organismal Systems;Environmental Information Processing;Cellular Processes;Human Diseases	Transport and catabolism;Infectious diseases;Immune system;Signaling molecules and interaction;Signal transduction	ko04060//Cytokine-cytokine receptor interaction;ko05168//Herpes simplex infection;ko05164//Influenza A;ko04630//Jak-STAT signaling pathway;ko04620//Toll-like receptor signaling pathway;ko04622//RIG-I-like receptor signaling pathway;ko04623//Cytosolic DNA-sensing pathway;ko04140//Regulation of autophagy	K05414	-	-	-
ENSGALG00000031105	S4A4	Electrogenic sodium bicarbonate cotransporter 1, partial [Anas platyrhynchos]	-	-	-	-	GO:0044425//membrane part;GO:0016020//membrane;GO:0031224//intrinsic component of membrane	GO:0022804//active transmembrane transporter activity;GO:0008509//anion transmembrane transporter activity;GO:0022891//substrate-specific transmembrane transporter activity;GO:0015291//secondary active transmembrane transporter activity;GO:0022857//transmembrane transporter activity;GO:0005215//transporter activity;GO:0099516//ion antiporter activity;GO:0015297//antiporter activity;GO:0015075//io…	GO:0044765//single-organism transport;GO:0051179//localization;GO:0051234//establishment of localization;GO:0006810//transport;GO:0006811//ion transport;GO:1902578//single-organism localization;GO:0044699//single-organism process
ENSGALG00000014335	ITFG2	PREDICTED: integrin-alpha FG-GAP repeat-containing protein 2 isoform X6 [Gallus gallus]	-	-	-	-	-	-	GO:0050789//regulation of biological process;GO:0007165//signal transduction;GO:0044700//single organism signaling;GO:0051716//cellular response to stimulus;GO:0009987//cellular process;GO:0050896//response to stimulus;GO:0050794//regulation of cellular process;GO:0023052//signaling;GO:0044699//single-organism process;GO:0044763//single-organism cellular process;GO:0007154//cell communication;GO:…
ENSGALG00000026594	HS3S5	PREDICTED: heparan sulfate glucosamine 3-O-sulfotransferase 5 isoform X6 [Gallus gallus]	Metabolism	Glycan biosynthesis and metabolism	ko00534//Glycosaminoglycan biosynthesis - heparan sulfate / heparin	K08104	-	GO:0003824//catalytic activity;GO:0016782//transferase activity, transferring sulfur-containing groups;GO:0008146//sulfotransferase activity;GO:0034483//heparan sulfate sulfotransferase activity;GO:0016740//transferase activity	GO:0008152//metabolic process;GO:0009101//glycoprotein biosynthetic process;GO:0044699//single-organism process;GO:0044710//single-organism metabolic process;GO:0044272//sulfur compound biosynthetic process;GO:0044711//single-organism biosynthetic process;GO:0006790//sulfur compound metabolic process;GO:0052126//movement in host environment;GO:0032501//multicellular organismal process;GO:0051828/…
ENSGALG00000030653	LV1	immunoglobulin lambda light chain, partial [Gallus gallus]	-	-	-	-	-	-	-
ENSGALG00000010711	NXPH1	PREDICTED: neurexophilin-1 isoform X2 [Gallus gallus]	-	-	-	-	-	GO:0005488//binding;GO:0005515//protein binding	-
ENSGALG00000040298	TPK1	PREDICTED: thiamin pyrophosphokinase 1 isoform X5 [Gallus gallus]	Metabolism	Global and Overview;Metabolism of cofactors and vitamins	ko01100//Metabolic pathways;ko00730//Thiamine metabolism	K00949	-	-	-
ENSGALG00000031971	CNTP2	PREDICTED: contactin-associated protein-like 2 isoform X1 [Meleagris gallopavo]	Environmental Information Processing	Signaling molecules and interaction	ko04514//Cell adhesion molecules (CAMs)	K07380	GO:0044425//membrane part;GO:0031224//intrinsic component of membrane;GO:0016020//membrane	-	GO:0022610//biological adhesion
ENSGALG00000014200	GBRB1	PREDICTED: LOW QUALITY PROTEIN: gamma-aminobutyric acid receptor subunit beta-1 [Gallus gallus]	Environmental Information Processing	Signaling molecules and interaction	ko04080//Neuroactive ligand-receptor interaction	K05181	GO:0044425//membrane part;GO:0031224//intrinsic component of membrane;GO:0016020//membrane	GO:0022803//passive transmembrane transporter activity;GO:0099600//transmembrane receptor activity;GO:0060089//molecular transducer activity;GO:0022836//gated channel activity;GO:0005215//transporter activity;GO:0005216//ion channel activity;GO:0022834//ligand-gated channel activity;GO:0015267//channel activity;GO:0022891//substrate-specific transmembrane transporter activity;GO:0015075//ion tran…	GO:0006811//ion transport;GO:0044763//single-organism cellular process;GO:0009987//cellular process;GO:0051234//establishment of localization;GO:0044765//single-organism transport;GO:0007154//cell communication;GO:0051179//localization;GO:0044699//single-organism process;GO:0006810//transport;GO:1902578//single-organism localization
ENSGALG00000038110	DGKA	PREDICTED: diacylglycerol kinase alpha [Alligator mississippiensis]	Metabolism;Environmental Information Processing	Signal transduction;Lipid metabolism;Global and Overview	ko01100//Metabolic pathways;ko01110//Biosynthesis of secondary metabolites;ko00564//Glycerophospholipid metabolism;ko04070//Phosphatidylinositol signaling system;ko00561//Glycerolipid metabolism	K00901	GO:0005737//cytoplasm;GO:0005623//cell;GO:0005622//intracellular;GO:0044444//cytoplasmic part;GO:0016020//membrane;GO:0044464//cell part;GO:0044424//intracellular part	GO:0032549//ribonucleoside binding;GO:0043167//ion binding;GO:0003824//catalytic activity;GO:0036094//small molecule binding;GO:0005488//binding;GO:0046872//metal ion binding;GO:0032550//purine ribonucleoside binding;GO:0043169//cation binding;GO:1901363//heterocyclic compound binding;GO:0016772//transferase activity, transferring phosphorus-containing groups;GO:0016301//kinase activity;GO:009715…	GO:0044237//cellular metabolic process;GO:0007186//G-protein coupled receptor signaling pathway;GO:0006793//phosphorus metabolic process;GO:0023052//signaling;GO:0050789//regulation of biological process;GO:0044699//single-organism process;GO:0009987//cellular process;GO:0008152//metabolic process;GO:0051716//cellular response to stimulus;GO:0065007//biological regulation;GO:0006796//phosphate-co…
ENSGALG00000007994	PAR6B	partitioning defective 6 homolog beta [Gallus gallus]	Cellular Processes	Transport and catabolism;Cellular commiunity	ko04144//Endocytosis;ko04530//Tight junction	K06093	GO:0005623//cell;GO:0043231//intracellular membrane-bounded organelle;GO:0005622//intracellular;GO:0030054//cell junction;GO:0043227//membrane-bounded organelle;GO:0044444//cytoplasmic part;GO:0043226//organelle;GO:0044464//cell part;GO:0016020//membrane;GO:0043296//apical junction complex;GO:0043229//intracellular organelle;GO:0044424//intracellular part;GO:0005911//cell-cell junction;GO:0005737…	-	GO:0016043//cellular component organization;GO:0044085//cellular component biogenesis;GO:0043933//macromolecular complex subunit organization;GO:0071840//cellular component organization or biogenesis;GO:0009987//cellular process;GO:0065003//macromolecular complex assembly;GO:0022607//cellular component assembly
ENSGALG00000011505	MARK3	PREDICTED: MAP/microtubule affinity-regulating kinase 3 isoform X3 [Meleagris gallopavo]	-	-	-	-	-	-	-
ENSGALG00000012018	CGT	2-hydroxyacylsphingosine 1-beta-galactosyltransferase precursor [Gallus gallus]	Metabolism	Lipid metabolism;Global and Overview	ko01100//Metabolic pathways;ko00565//Ether lipid metabolism;ko00600//Sphingolipid metabolism	K04628	-	GO:0003824//catalytic activity;GO:0016757//transferase activity, transferring glycosyl groups;GO:0016740//transferase activity	GO:1902578//single-organism localization;GO:0030030//cell projection organization;GO:0044085//cellular component biogenesis;GO:0071840//cellular component organization or biogenesis;GO:0006996//organelle organization;GO:0048666//neuron development;GO:0051641//cellular localization;GO:0030154//cell differentiation;GO:0044767//single-organism developmental process;GO:0007018//microtubule-based move…
ENSGALG00000044171	RHG32	PREDICTED: rho GTPase-activating protein 32-like, partial [Pterocles gutturalis]	-	-	-	-	GO:0043227//membrane-bounded organelle;GO:0097458//neuron part;GO:0044431//Golgi apparatus part;GO:0097060//synaptic membrane;GO:0098589//membrane region;GO:0005768//endosome;GO:0005794//Golgi apparatus;GO:0044444//cytoplasmic part;GO:0005622//intracellular;GO:0043232//intracellular non-membrane-bounded organelle;GO:0044422//organelle part;GO:0044456//synapse part;GO:0042995//cell projection;GO:0…	GO:0043168//anion binding;GO:0098772//molecular function regulator;GO:0005488//binding;GO:0008289//lipid binding;GO:0005543//phospholipid binding;GO:0043167//ion binding;GO:0030234//enzyme regulator activity;GO:0008047//enzyme activator activity	GO:0051716//cellular response to stimulus;GO:0023052//signaling;GO:0035556//intracellular signal transduction;GO:0044699//single-organism process;GO:0007264//small GTPase mediated signal transduction;GO:0050789//regulation of biological process;GO:0065007//biological regulation;GO:0044763//single-organism cellular process;GO:0007165//signal transduction;GO:0044700//single organism signaling;GO:00…
ENSGALG00000014189	ST4A1	PREDICTED: sulfotransferase 4A1 [Haliaeetus leucocephalus]	-	-	-	-	GO:0044444//cytoplasmic part;GO:0005622//intracellular;GO:0044424//intracellular part;GO:0005623//cell;GO:0044464//cell part;GO:0005737//cytoplasm	GO:0016782//transferase activity, transferring sulfur-containing groups;GO:0016740//transferase activity;GO:0003824//catalytic activity;GO:0005488//binding	GO:0044710//single-organism metabolic process;GO:0008152//metabolic process;GO:0044237//cellular metabolic process;GO:0009987//cellular process;GO:0044699//single-organism process;GO:0006790//sulfur compound metabolic process;GO:0006629//lipid metabolic process;GO:0071704//organic substance metabolic process;GO:0044238//primary metabolic process
ENSGALG00000046351	GCFC2	GC-rich sequence DNA-binding factor 2, partial [Manacus vitellinus]	-	-	-	-	-	-	-
ENSGALG00000016236	USP9X	PREDICTED: probable ubiquitin carboxyl-terminal hydrolase FAF-X isoformX2 [Gallus gallus]	-	-	-	-	-	GO:0008233//peptidase activity;GO:0003824//catalytic activity;GO:0016787//hydrolase activity;GO:0070011//peptidase activity, acting on L-amino acid peptides	GO:0009057//macromolecule catabolic process;GO:0019538//protein metabolic process;GO:1901575//organic substance catabolic process;GO:0044238//primary metabolic process;GO:0044257//cellular protein catabolic process;GO:0043632//modification-dependent macromolecule catabolic process;GO:0043170//macromolecule metabolic process;GO:0051603//proteolysis involved in cellular protein catabolic process;GO…
ENSGALG00000030580	KS6A5	ribosomal protein S6 kinase alpha-5 [Gallus gallus]	Environmental Information Processing;Organismal Systems	Circulatory system;Signal transduction	ko04010//MAPK signaling pathway;ko04261//Adrenergic signaling in cardiomyocytes	K04445	GO:0044424//intracellular part;GO:0043227//membrane-bounded organelle;GO:0043231//intracellular membrane-bounded organelle;GO:0043229//intracellular organelle;GO:0005623//cell;GO:0044464//cell part;GO:0043226//organelle;GO:0005622//intracellular	GO:0036094//small molecule binding;GO:0016773//phosphotransferase activity, alcohol group as acceptor;GO:0043167//ion binding;GO:0097367//carbohydrate derivative binding;GO:0005488//binding;GO:1901363//heterocyclic compound binding;GO:0032549//ribonucleoside binding;GO:0032550//purine ribonucleoside binding;GO:0043169//cation binding;GO:0016301//kinase activity;GO:0001882//nucleoside binding;GO:0…	GO:0031325//positive regulation of cellular metabolic process;GO:0006475//internal protein amino acid acetylation;GO:0045935//positive regulation of nucleobase-containing compound metabolic process;GO:0050896//response to stimulus;GO:0046483//heterocycle metabolic process;GO:0090304//nucleic acid metabolic process;GO:0007166//cell surface receptor signaling pathway;GO:0009891//positive regulation…
ENSGALG00000014703	PRRC1	RecName: Full=Protein PRRC1; AltName: Full=Proline-rich and coiled-coil-containing protein 1 [Gallus gallus]	-	-	-	-	GO:0043227//membrane-bounded organelle;GO:0005622//intracellular;GO:0043231//intracellular membrane-bounded organelle;GO:0044464//cell part;GO:0044424//intracellular part;GO:0005623//cell;GO:0043226//organelle;GO:0043229//intracellular organelle	-	-
ENSGALG00000015497	VGLL3	PREDICTED: transcription cofactor vestigial-like protein 3 isoform X2 [Gallus gallus]	-	-	-	-	-	-	GO:0034645//cellular macromolecule biosynthetic process;GO:0044271//cellular nitrogen compound biosynthetic process;GO:0034641//cellular nitrogen compound metabolic process;GO:0009059//macromolecule biosynthetic process;GO:0006725//cellular aromatic compound metabolic process;GO:0071704//organic substance metabolic process;GO:0018130//heterocycle biosynthetic process;GO:0006807//nitrogen compound…
ENSGALG00000012941	CAD12	PREDICTED: cadherin-12 isoform X10 [Gallus gallus]	-	-	-	-	GO:0016020//membrane;GO:0044425//membrane part;GO:0031224//intrinsic component of membrane	GO:0043169//cation binding;GO:0005488//binding;GO:0046872//metal ion binding;GO:0043167//ion binding	GO:0007155//cell adhesion;GO:0022610//biological adhesion;GO:0098609//cell-cell adhesion
ENSGALG00000005808	KREM1	PREDICTED: kremen protein 1 isoform X2 [Gallus gallus]	-	-	-	-	-	-	-
ENSGALG00000034218	PA2G4	PREDICTED: LOW QUALITY PROTEIN: proliferation-associated protein 2G4 [Chrysemys picta bellii]	-	-	-	-	GO:0044424//intracellular part;GO:0005622//intracellular;GO:0005623//cell;GO:0044464//cell part	-	-
ENSGALG00000029013	IFNA1	PREDICTED: interferon type A1/A2-like [Gallus gallus]	Cellular Processes;Environmental Information Processing;Organismal Systems;Human Diseases	Transport and catabolism;Immune system;Infectious diseases;Signaling molecules and interaction;Signal transduction	ko04060//Cytokine-cytokine receptor interaction;ko05168//Herpes simplex infection;ko05164//Influenza A;ko04630//Jak-STAT signaling pathway;ko04620//Toll-like receptor signaling pathway;ko04622//RIG-I-like receptor signaling pathway;ko04623//Cytosolic DNA-sensing pathway;ko04140//Regulation of autophagy	K05414	-	-	-
ENSGALG00000011236	BEGIN	PREDICTED: brain-enriched guanylate kinase-associated protein isoform X1 [Aquila chrysaetos canadensis]	-	-	-	-	-	-	-
ENSGALG00000006780	AR6P1	ADP-ribosylation factor-like protein 6-interacting protein 1 [Gallus gallus]	-	-	-	-	GO:0005789//endoplasmic reticulum membrane;GO:0042175//nuclear outer membrane-endoplasmic reticulum membrane network;GO:0071256//translocon complex;GO:0005623//cell;GO:0043231//intracellular membrane-bounded organelle;GO:0098796//membrane protein complex;GO:0030867//rough endoplasmic reticulum membrane;GO:0044425//membrane part;GO:0005791//rough endoplasmic reticulum;GO:0044424//intracellular par…	-	GO:0090150//establishment of protein localization to membrane;GO:0006612//protein targeting to membrane;GO:0051234//establishment of localization;GO:0006810//transport;GO:0044763//single-organism cellular process;GO:0045184//establishment of protein localization;GO:0071840//cellular component organization or biogenesis;GO:0044802//single-organism membrane organization;GO:0051641//cellular localiz…
ENSGALG00000044794	--	hypothetical protein Anapl_00447, partial [Anas platyrhynchos]	-	-	-	-	-	-	-
ENSGALG00000002539	KCNN2	small conductance calcium-activated potassium channel protein 2 [Gallus gallus]	-	-	-	-	GO:0036477//somatodendritic compartment;GO:0042383//sarcolemma;GO:0031224//intrinsic component of membrane;GO:0005622//intracellular;GO:0044425//membrane part;GO:0043229//intracellular organelle;GO:0097458//neuron part;GO:0043232//intracellular non-membrane-bounded organelle;GO:0012505//endomembrane system;GO:0042995//cell projection;GO:0044464//cell part;GO:0005886//plasma membrane;GO:0005623//c…	GO:0042805//actinin binding;GO:0022836//gated channel activity;GO:0022857//transmembrane transporter activity;GO:0022838//substrate-specific channel activity;GO:0005267//potassium channel activity;GO:0022891//substrate-specific transmembrane transporter activity;GO:0022892//substrate-specific transporter activity;GO:0005215//transporter activity;GO:0015077//monovalent inorganic cation transmembra…	GO:0050794//regulation of cellular process;GO:0032879//regulation of localization;GO:0044699//single-organism process;GO:0051234//establishment of localization;GO:0050789//regulation of biological process;GO:0006810//transport;GO:0065007//biological regulation;GO:0043269//regulation of ion transport;GO:0006811//ion transport;GO:0051049//regulation of transport;GO:0034765//regulation of ion transm…
ENSGALG00000015841	CLD8	PREDICTED: claudin-8 [Gallus gallus]	Environmental Information Processing;Cellular Processes	Signaling molecules and interaction;Cellular commiunity	ko04530//Tight junction;ko04514//Cell adhesion molecules (CAMs)	K06087	GO:0044424//intracellular part;GO:0005623//cell;GO:0031224//intrinsic component of membrane;GO:0030054//cell junction;GO:0005622//intracellular;GO:0043296//apical junction complex;GO:0044425//membrane part;GO:0044464//cell part;GO:0043229//intracellular organelle;GO:0016020//membrane;GO:0043231//intracellular membrane-bounded organelle;GO:0043227//membrane-bounded organelle;GO:0005911//cell-cell …	-	-
ENSGALG00000005617	NTH	Escherichia coli endonuclease III-like 1 [Gallus gallus]	Genetic Information Processing	Replication and repair	ko03410//Base excision repair	K10773	GO:0044424//intracellular part;GO:0043226//organelle;GO:0044464//cell part;GO:0043227//membrane-bounded organelle;GO:0043231//intracellular membrane-bounded organelle;GO:0005623//cell;GO:0005622//intracellular;GO:0043229//intracellular organelle	GO:0004519//endonuclease activity;GO:0004518//nuclease activity;GO:0003824//catalytic activity;GO:0004536//deoxyribonuclease activity;GO:0016787//hydrolase activity;GO:0051536//iron-sulfur cluster binding;GO:0003676//nucleic acid binding;GO:0016799//hydrolase activity, hydrolyzing N-glycosyl compounds;GO:0003677//DNA binding;GO:0051540//metal cluster binding;GO:1901363//heterocyclic compound bind…	GO:0044260//cellular macromolecule metabolic process;GO:0090305//nucleic acid phosphodiester bond hydrolysis;GO:0033554//cellular response to stress;GO:0044710//single-organism metabolic process;GO:0006807//nitrogen compound metabolic process;GO:0043170//macromolecule metabolic process;GO:0006289//nucleotide-excision repair;GO:0006725//cellular aromatic compound metabolic process;GO:0044699//sing…
ENSGALG00000021378	UBAP1	PREDICTED: ubiquitin-associated protein 1 isoform X4 [Gallus gallus]	-	-	-	-	GO:0098588//bounding membrane of organelle;GO:0044444//cytoplasmic part;GO:0016020//membrane;GO:0044464//cell part;GO:0043226//organelle;GO:0005623//cell;GO:0005768//endosome;GO:0044446//intracellular organelle part;GO:0010008//endosome membrane;GO:0098805//whole membrane;GO:0044440//endosomal part;GO:0043231//intracellular membrane-bounded organelle;GO:0044424//intracellular part;GO:0044422//org…	GO:0032182//ubiquitin-like protein binding;GO:0005488//binding;GO:0005515//protein binding	GO:0044238//primary metabolic process;GO:0030163//protein catabolic process;GO:0008152//metabolic process;GO:0006511//ubiquitin-dependent protein catabolic process;GO:0009057//macromolecule catabolic process;GO:0019941//modification-dependent protein catabolic process;GO:0044257//cellular protein catabolic process;GO:0044237//cellular metabolic process;GO:0006508//proteolysis;GO:0051603//proteoly…
ENSGALG00000015655	PALM2	PREDICTED: paralemmin-2 isoform X2 [Anas platyrhynchos]	-	-	-	-	-	-	-
ENSGALG00000014324	GTR3	solute carrier family 2, facilitated glucose transporter member 3 [Gallus gallus]	-	-	-	-	GO:0031224//intrinsic component of membrane;GO:0044425//membrane part;GO:0016020//membrane	GO:0022857//transmembrane transporter activity;GO:0022891//substrate-specific transmembrane transporter activity;GO:0005215//transporter activity;GO:0015144//carbohydrate transmembrane transporter activity;GO:0051183//vitamin transporter activity;GO:0005355//glucose transmembrane transporter activity;GO:0015149//hexose transmembrane transporter activity;GO:1901476//carbohydrate transporter activi…	GO:0008643//carbohydrate transport;GO:0044238//primary metabolic process;GO:1902578//single-organism localization;GO:0044710//single-organism metabolic process;GO:0044699//single-organism process;GO:0015749//monosaccharide transport;GO:0008152//metabolic process;GO:0051234//establishment of localization;GO:0008645//hexose transport;GO:0006810//transport;GO:0071702//organic substance transport;GO:…
ENSGALG00000035350	PMEL	PMEL17 protein [Gallus gallus]	-	-	-	-	GO:0005622//intracellular;GO:0044424//intracellular part;GO:0031410//cytoplasmic vesicle;GO:0012505//endomembrane system;GO:0043227//membrane-bounded organelle;GO:0031982//vesicle;GO:0042470//melanosome;GO:0005623//cell;GO:0005768//endosome;GO:0048770//pigment granule;GO:0043226//organelle;GO:0016023//cytoplasmic, membrane-bounded vesicle;GO:0043231//intracellular membrane-bounded organelle;GO:00…	-	GO:0042440//pigment metabolic process;GO:1901615//organic hydroxy compound metabolic process;GO:0048753//pigment granule organization;GO:0016043//cellular component organization;GO:0071840//cellular component organization or biogenesis;GO:0006582//melanin metabolic process;GO:0043473//pigmentation;GO:0033059//cellular pigmentation;GO:0071704//organic substance metabolic process;GO:0006725//cellul…
ENSGALG00000005229	DPH5	PREDICTED: diphthine synthase isoform X2 [Gallus gallus]	-	-	-	-	-	GO:0003824//catalytic activity;GO:0008168//methyltransferase activity;GO:0008757//S-adenosylmethionine-dependent methyltransferase activity;GO:0016740//transferase activity;GO:0016741//transferase activity, transferring one-carbon groups	GO:0071704//organic substance metabolic process;GO:0036211//protein modification process;GO:0044267//cellular protein metabolic process;GO:0044237//cellular metabolic process;GO:0018193//peptidyl-amino acid modification;GO:0009987//cellular process;GO:0017182//peptidyl-diphthamide metabolic process;GO:0044260//cellular macromolecule metabolic process;GO:0043170//macromolecule metabolic process;GO…
ENSGALG00000005896	CAH15	PREDICTED: carbonic anhydrase 15-like [Gallus gallus]	Metabolism	Energy metabolism	ko00910//Nitrogen metabolism	K01672	GO:0016020//membrane;GO:0031224//intrinsic component of membrane;GO:0031225//anchored component of membrane;GO:0044425//membrane part	GO:0016829//lyase activity;GO:0016835//carbon-oxygen lyase activity;GO:0016836//hydro-lyase activity;GO:0003824//catalytic activity	-
ENSGALG00000044245	GSC2	PREDICTED: homeobox protein goosecoid-2 [Meleagris gallopavo]	-	-	-	-	-	-	-
ENSGALG00000006258	TICN1	PREDICTED: testican-1 isoform X4 [Gallus gallus]	-	-	-	-	GO:0031012//extracellular matrix	GO:0005488//binding;GO:0043169//cation binding;GO:0043167//ion binding;GO:0046872//metal ion binding	GO:0044763//single-organism cellular process;GO:0007154//cell communication;GO:0044699//single-organism process;GO:0009987//cellular process
ENSGALG00000001046	DLGP4	PREDICTED: disks large-associated protein 4 isoform X12 [Gallus gallus]	-	-	-	-	-	-	GO:0009987//cellular process;GO:0044699//single-organism process;GO:0044763//single-organism cellular process;GO:0007154//cell communication
ENSGALG00000005891	IDD	PREDICTED: integral membrane protein DGCR2/IDD isoform 1 [Gallus gallus]	-	-	-	-	-	GO:0005488//binding	-
ENSGALG00000005208	S1PR1	PREDICTED: sphingosine 1-phosphate receptor 1 isoform X3 [Gallus gallus]	Environmental Information Processing	Signal transduction;Signaling molecules and interaction	ko04080//Neuroactive ligand-receptor interaction;ko04068//FoxO signaling pathway	K04288	GO:0016020//membrane;GO:0031224//intrinsic component of membrane;GO:0005623//cell;GO:0005886//plasma membrane;GO:0044464//cell part;GO:0071944//cell periphery;GO:0044425//membrane part	GO:0004871//signal transducer activity;GO:0004872//receptor activity;GO:0099600//transmembrane receptor activity;GO:0045125//bioactive lipid receptor activity;GO:0060089//molecular transducer activity;GO:0004888//transmembrane signaling receptor activity;GO:0038023//signaling receptor activity;GO:0004930//G-protein coupled receptor activity	GO:0007187//G-protein coupled receptor signaling pathway, coupled to cyclic nucleotide second messenger;GO:0032502//developmental process;GO:0023052//signaling;GO:0050794//regulation of cellular process;GO:0048856//anatomical structure development;GO:0007399//nervous system development;GO:0007188//adenylate cyclase-modulating G-protein coupled receptor signaling pathway;GO:0044707//single-multice…
ENSGALG00000011481	GPD1L	PREDICTED: glycerol-3-phosphate dehydrogenase 1-like isoform X2 [Gallus gallus]	Metabolism	Lipid metabolism;Global and Overview	ko01110//Biosynthesis of secondary metabolites;ko00564//Glycerophospholipid metabolism	K00006	GO:0044464//cell part;GO:0044444//cytoplasmic part;GO:0016020//membrane;GO:0005622//intracellular;GO:0005737//cytoplasm;GO:0044424//intracellular part;GO:0005623//cell	GO:0036094//small molecule binding;GO:0016491//oxidoreductase activity;GO:0016616//oxidoreductase activity, acting on the CH-OH group of donors, NAD or NADP as acceptor;GO:0097159//organic cyclic compound binding;GO:0000166//nucleotide binding;GO:0003824//catalytic activity;GO:0016614//oxidoreductase activity, acting on CH-OH group of donors;GO:0046983//protein dimerization activity;GO:0098772//m…	GO:0032879//regulation of localization;GO:0044763//single-organism cellular process;GO:0086002//cardiac muscle cell action potential involved in contraction;GO:0031324//negative regulation of cellular metabolic process;GO:0051246//regulation of protein metabolic process;GO:0006753//nucleoside phosphate metabolic process;GO:0032501//multicellular organismal process;GO:1901564//organonitrogen compo…
ENSGALG00000046307	SPAG4	PREDICTED: sperm-associated antigen 4 protein-like isoform X1 [Gallus gallus]	-	-	-	-	-	-	-
ENSGALG00000006829	SMG1	PREDICTED: LOW QUALITY PROTEIN: serine/threonine-protein kinase SMG1 [Gallus gallus]	Genetic Information Processing	Translation	ko03015//mRNA surveillance pathway	K08873	-	-	-
ENSGALG00000044396	IFNA1	interferon type A1/A2 precursor [Gallus gallus]	Organismal Systems;Environmental Information Processing;Cellular Processes;Human Diseases	Transport and catabolism;Infectious diseases;Immune system;Signal transduction;Signaling molecules and interaction	ko04060//Cytokine-cytokine receptor interaction;ko05168//Herpes simplex infection;ko05164//Influenza A;ko04630//Jak-STAT signaling pathway;ko04620//Toll-like receptor signaling pathway;ko04622//RIG-I-like receptor signaling pathway;ko04623//Cytosolic DNA-sensing pathway;ko04140//Regulation of autophagy	K05414	-	-	-
ENSGALG00000026912	IFNA1	PREDICTED: interferon type A1/A2-like [Gallus gallus]	Human Diseases;Cellular Processes;Environmental Information Processing;Organismal Systems	Transport and catabolism;Immune system;Infectious diseases;Signaling molecules and interaction;Signal transduction	ko04060//Cytokine-cytokine receptor interaction;ko05168//Herpes simplex infection;ko05164//Influenza A;ko04630//Jak-STAT signaling pathway;ko04620//Toll-like receptor signaling pathway;ko04622//RIG-I-like receptor signaling pathway;ko04623//Cytosolic DNA-sensing pathway;ko04140//Regulation of autophagy	K05414	-	-	-
ENSGALG00000034616	INHBA	inhibin/activin beta A-subunit [Gallus gallus]	Environmental Information Processing	Signal transduction;Signaling molecules and interaction	ko04060//Cytokine-cytokine receptor interaction;ko04350//TGF-beta signaling pathway	K04667	GO:0043511//inhibin complex;GO:0005576//extracellular region;GO:0005615//extracellular space;GO:0044421//extracellular region part;GO:0048180//activin complex;GO:0032991//macromolecular complex;GO:0043234//protein complex	GO:0042277//peptide binding;GO:0070697//activin receptor binding;GO:0005488//binding;GO:0033612//receptor serine/threonine kinase binding;GO:0070696//transmembrane receptor protein serine/threonine kinase binding;GO:0033218//amide binding;GO:0005102//receptor binding;GO:0005515//protein binding	GO:0023052//signaling;GO:0022402//cell cycle process;GO:0002376//immune system process;GO:0048584//positive regulation of response to stimulus;GO:0032268//regulation of cellular protein metabolic process;GO:0034654//nucleobase-containing compound biosynthetic process;GO:0007178//transmembrane receptor protein serine/threonine kinase signaling pathway;GO:1901576//organic substance biosynthetic pro…
ENSGALG00000044473	RHG32	PREDICTED: rho GTPase-activating protein 32-like, partial [Eurypyga helias]	-	-	-	-	-	-	-
ENSGALG00000005329	HIAT1	PREDICTED: hippocampus abundant transcript 1 protein [Melopsittacus undulatus]	-	-	-	-	GO:0016020//membrane;GO:0031224//intrinsic component of membrane;GO:0044425//membrane part	-	GO:0051179//localization;GO:0009987//cellular process;GO:0044699//single-organism process;GO:0044763//single-organism cellular process;GO:0051234//establishment of localization
ENSGALG00000044121	GCFC2	GC-rich sequence DNA-binding factor 2, partial [Manacus vitellinus]	-	-	-	-	GO:0044464//cell part;GO:0005622//intracellular;GO:0044424//intracellular part;GO:0043229//intracellular organelle;GO:0043226//organelle;GO:0043231//intracellular membrane-bounded organelle;GO:0005623//cell;GO:0043227//membrane-bounded organelle	GO:0001071//nucleic acid binding transcription factor activity	GO:0006351//transcription, DNA-templated;GO:0046483//heterocycle metabolic process;GO:0034641//cellular nitrogen compound metabolic process;GO:1901576//organic substance biosynthetic process;GO:0044260//cellular macromolecule metabolic process;GO:0010467//gene expression;GO:0016070//RNA metabolic process;GO:0044238//primary metabolic process;GO:0034654//nucleobase-containing compound biosynthetic…
ENSGALG00000040260	TBA1B	Tubulin alpha-1C chain [Fukomys damarensis]	Cellular Processes	Cellular commiunity;Transport and catabolism	ko04145//Phagosome;ko04540//Gap junction	K07374	GO:0043228//non-membrane-bounded organelle;GO:0005623//cell;GO:0005874//microtubule;GO:0043226//organelle;GO:0043232//intracellular non-membrane-bounded organelle;GO:0044422//organelle part;GO:0005622//intracellular;GO:0099513//polymeric cytoskeletal fiber;GO:0099512//supramolecular fiber;GO:0005856//cytoskeleton;GO:0044446//intracellular organelle part;GO:0015630//microtubule cytoskeleton;GO:004…	GO:0036094//small molecule binding;GO:0001882//nucleoside binding;GO:0097367//carbohydrate derivative binding;GO:0001883//purine nucleoside binding;GO:0017111//nucleoside-triphosphatase activity;GO:1901363//heterocyclic compound binding;GO:0016462//pyrophosphatase activity;GO:0016817//hydrolase activity, acting on acid anhydrides;GO:0032550//purine ribonucleoside binding;GO:0005198//structural mo…	GO:0044281//small molecule metabolic process;GO:0019439//aromatic compound catabolic process;GO:0006195//purine nucleotide catabolic process;GO:0071704//organic substance metabolic process;GO:0070271//protein complex biogenesis;GO:0044763//single-organism cellular process;GO:0009154//purine ribonucleotide catabolic process;GO:0044238//primary metabolic process;GO:0006461//protein complex assembly…
ENSGALG00000014362	CD86	T-lymphocyte activation antigen CD86 precursor [Gallus gallus]	Organismal Systems;Environmental Information Processing	Immune system;Signaling molecules and interaction	ko04514//Cell adhesion molecules (CAMs);ko04620//Toll-like receptor signaling pathway;ko04672//Intestinal immune network for IgA production	K05413	GO:0016020//membrane;GO:0043226//organelle;GO:0043227//membrane-bounded organelle;GO:0044464//cell part;GO:0005886//plasma membrane;GO:0071944//cell periphery;GO:0005623//cell	-	GO:0023052//signaling;GO:0001775//cell activation;GO:0002253//activation of immune response;GO:0002757//immune response-activating signal transduction;GO:0002682//regulation of immune system process;GO:0050778//positive regulation of immune response;GO:0044763//single-organism cellular process;GO:0045088//regulation of innate immune response;GO:0002252//immune effector process;GO:0048583//regulat…
ENSGALG00000013684	SGCZ	PREDICTED: zeta-sarcoglycan isoform X3 [Gallus gallus]	-	-	-	-	GO:0016010//dystrophin-associated glycoprotein complex;GO:0043234//protein complex;GO:0090665//glycoprotein complex;GO:0071944//cell periphery;GO:0016020//membrane;GO:0044459//plasma membrane part;GO:0005886//plasma membrane;GO:0031224//intrinsic component of membrane;GO:0005623//cell;GO:0044464//cell part;GO:0098796//membrane protein complex;GO:0044425//membrane part;GO:0032991//macromolecular c…	-	-
ENSGALG00000025763	SPAG4	PREDICTED: SUN domain-containing protein 3-like isoform X3 [Gallus gallus]	-	-	-	-	-	-	-
ENSGALG00000045405	RHG32	PREDICTED: rho GTPase-activating protein 32-like, partial [Pterocles gutturalis]	-	-	-	-	GO:0044446//intracellular organelle part;GO:0044424//intracellular part;GO:0098589//membrane region;GO:0005737//cytoplasm;GO:0005794//Golgi apparatus;GO:0044430//cytoskeletal part;GO:0043231//intracellular membrane-bounded organelle;GO:0043005//neuron projection;GO:0071944//cell periphery;GO:0043226//organelle;GO:0036477//somatodendritic compartment;GO:0005623//cell;GO:0005886//plasma membrane;GO…	GO:0008047//enzyme activator activity;GO:0005488//binding;GO:0098772//molecular function regulator;GO:0030234//enzyme regulator activity;GO:0008289//lipid binding;GO:0043168//anion binding;GO:0043167//ion binding;GO:0005543//phospholipid binding	GO:0009987//cellular process;GO:0044699//single-organism process;GO:0051716//cellular response to stimulus;GO:0044700//single organism signaling;GO:0007264//small GTPase mediated signal transduction;GO:0044763//single-organism cellular process;GO:0007154//cell communication;GO:0007165//signal transduction;GO:0050794//regulation of cellular process;GO:0065007//biological regulation;GO:0050789//reg…
ENSGALG00000015589	MSH3	PREDICTED: DNA mismatch repair protein Msh3 isoform X1 [Gallus gallus]	Genetic Information Processing	Replication and repair	ko03430//Mismatch repair	K08736	GO:0043234//protein complex;GO:0005623//cell;GO:0044464//cell part;GO:0032991//macromolecular complex;GO:0044424//intracellular part;GO:0005622//intracellular;GO:1990391//DNA repair complex;GO:0032300//mismatch repair complex	GO:0005488//binding;GO:0097367//carbohydrate derivative binding;GO:0003684//damaged DNA binding;GO:0097159//organic cyclic compound binding;GO:0001882//nucleoside binding;GO:0005515//protein binding;GO:1901363//heterocyclic compound binding;GO:0032549//ribonucleoside binding;GO:0032550//purine ribonucleoside binding;GO:0003690//double-stranded DNA binding;GO:0003677//DNA binding;GO:0032356//oxidi…	GO:0002200//somatic diversification of immune receptors;GO:0060255//regulation of macromolecule metabolic process;GO:0002520//immune system development;GO:0033554//cellular response to stress;GO:0016444//somatic cell DNA recombination;GO:0006725//cellular aromatic compound metabolic process;GO:0006950//response to stress;GO:0006996//organelle organization;GO:0048731//system development;GO:0034641…
ENSGALG00000007963	NFAC2	PREDICTED: nuclear factor of activated T-cells, cytoplasmic 2 isoform X10 [Gallus gallus]	Environmental Information Processing	Signal transduction	ko04310//Wnt signaling pathway;ko04370//VEGF signaling pathway	K17332	GO:0043231//intracellular membrane-bounded organelle;GO:0043226//organelle;GO:0044444//cytoplasmic part;GO:0044424//intracellular part;GO:0016020//membrane;GO:0043229//intracellular organelle;GO:0044464//cell part;GO:0032991//macromolecular complex;GO:0005737//cytoplasm;GO:0005622//intracellular;GO:0043232//intracellular non-membrane-bounded organelle;GO:0043228//non-membrane-bounded organelle;GO…	GO:0003677//DNA binding;GO:0097159//organic cyclic compound binding;GO:0003676//nucleic acid binding;GO:0000975//regulatory region DNA binding;GO:0001067//regulatory region nucleic acid binding;GO:1901363//heterocyclic compound binding;GO:0001071//nucleic acid binding transcription factor activity;GO:0005488//binding	GO:0050794//regulation of cellular process;GO:0048583//regulation of response to stimulus;GO:0050670//regulation of lymphocyte proliferation;GO:0050778//positive regulation of immune response;GO:0009058//biosynthetic process;GO:0006725//cellular aromatic compound metabolic process;GO:0002429//immune response-activating cell surface receptor signaling pathway;GO:0002694//regulation of leukocyte ac…
ENSGALG00000026757	DYR	dihydrofolate reductase [Gallus gallus]	Metabolism	Global and Overview;Metabolism of cofactors and vitamins	ko01100//Metabolic pathways;ko00670//One carbon pool by folate;ko00790//Folate biosynthesis	K00287	-	GO:0003723//RNA binding;GO:0044822//poly(A) RNA binding;GO:0016645//oxidoreductase activity, acting on the CH-NH group of donors;GO:0097159//organic cyclic compound binding;GO:0036094//small molecule binding;GO:1901363//heterocyclic compound binding;GO:0003676//nucleic acid binding;GO:0005488//binding;GO:0003824//catalytic activity;GO:0016646//oxidoreductase activity, acting on the CH-NH group of…	GO:0044237//cellular metabolic process;GO:0051186//cofactor metabolic process;GO:1901362//organic cyclic compound biosynthetic process;GO:0071704//organic substance metabolic process;GO:1901576//organic substance biosynthetic process;GO:0043604//amide biosynthetic process;GO:0046394//carboxylic acid biosynthetic process;GO:0009108//coenzyme biosynthetic process;GO:1901360//organic cyclic compound…
ENSGALG00000021139	LV1	Ig lambda chain V-1 region precursor [Gallus gallus]	-	-	-	-	-	-	-
ENSGALG00000037826	TESP1	PREDICTED: protein TESPA1 [Aquila chrysaetos canadensis]	-	-	-	-	-	-	-
ENSGALG00000014863	CE028	PREDICTED: transmembrane protein C5orf28 isoform X4 [Gallus gallus]	-	-	-	-	-	-	-
ENSGALG00000044519	APOP1	PREDICTED: apoptogenic protein 1, mitochondrial [Gallus gallus]	-	-	-	-	-	-	-
ENSGALG00000024469	PP14D	PREDICTED: protein phosphatase 1 regulatory subunit 14D isoform X5 [Gallus gallus]	-	-	-	-	GO:0005622//intracellular;GO:0005623//cell;GO:0044464//cell part;GO:0044424//intracellular part	-	GO:0009987//cellular process;GO:0008152//metabolic process;GO:0006793//phosphorus metabolic process;GO:0016310//phosphorylation;GO:0044237//cellular metabolic process;GO:0006796//phosphate-containing compound metabolic process
ENSGALG00000015689	ECM29	PREDICTED: proteasome-associated protein ECM29 homolog isoform X2 [Gallus gallus]	-	-	-	-	GO:0032991//macromolecular complex;GO:0043234//protein complex	-	-
ENSGALG00000045383	--	PREDICTED: hornerin-like [Anas platyrhynchos]	-	-	-	-	-	-	-
ENSGALG00000046522	GCFC2	GC-rich sequence DNA-binding factor 2, partial [Pterocles gutturalis]	-	-	-	-	GO:0043226//organelle;GO:0043231//intracellular membrane-bounded organelle;GO:0043229//intracellular organelle;GO:0043227//membrane-bounded organelle;GO:0044464//cell part;GO:0005623//cell;GO:0005622//intracellular;GO:0044424//intracellular part	GO:0001071//nucleic acid binding transcription factor activity	GO:0016070//RNA metabolic process;GO:0071704//organic substance metabolic process;GO:1901576//organic substance biosynthetic process;GO:0044271//cellular nitrogen compound biosynthetic process;GO:0006807//nitrogen compound metabolic process;GO:0044238//primary metabolic process;GO:0034654//nucleobase-containing compound biosynthetic process;GO:0006139//nucleobase-containing compound metabolic pro…
ENSGALG00000010179	RFX3	PREDICTED: transcription factor RFX3 isoform X1 [Gallus gallus]	-	-	-	-	GO:0005694//chromosome;GO:0043229//intracellular organelle;GO:0043232//intracellular non-membrane-bounded organelle;GO:0044424//intracellular part;GO:0043228//non-membrane-bounded organelle;GO:0000785//chromatin;GO:0044464//cell part;GO:0043226//organelle;GO:0044427//chromosomal part;GO:0005623//cell;GO:0043231//intracellular membrane-bounded organelle;GO:0044446//intracellular organelle part;GO:…	GO:0003677//DNA binding;GO:0001067//regulatory region nucleic acid binding;GO:1901363//heterocyclic compound binding;GO:0097159//organic cyclic compound binding;GO:0003676//nucleic acid binding;GO:0001071//nucleic acid binding transcription factor activity;GO:0005488//binding;GO:0000975//regulatory region DNA binding	GO:0046879//hormone secretion;GO:0050793//regulation of developmental process;GO:0023061//signal release;GO:0051179//localization;GO:0032501//multicellular organismal process;GO:0032940//secretion by cell;GO:0044237//cellular metabolic process;GO:0046483//heterocycle metabolic process;GO:0007154//cell communication;GO:0006725//cellular aromatic compound metabolic process;GO:0044763//single-organi…
ENSGALG00000012754	PH4H	phenylalanine-4-hydroxylase [Gallus gallus]	Metabolism	Global and Overview;Amino acid metabolism	ko01100//Metabolic pathways;ko01230//Biosynthesis of amino acids;ko00360//Phenylalanine metabolism;ko00400//Phenylalanine, tyrosine and tryptophan biosynthesis	K00500	-	GO:0046872//metal ion binding;GO:0043169//cation binding;GO:0036094//small molecule binding;GO:0043177//organic acid binding;GO:0004497//monooxygenase activity;GO:0016714//oxidoreductase activity, acting on paired donors, with incorporation or reduction of molecular oxygen, reduced pteridine as one donor, and incorporation of one atom of oxygen;GO:0043167//ion binding;GO:0016491//oxidoreductase a…	GO:0009072//aromatic amino acid family metabolic process;GO:0044763//single-organism cellular process;GO:0006807//nitrogen compound metabolic process;GO:0043436//oxoacid metabolic process;GO:0006520//cellular amino acid metabolic process;GO:0019752//carboxylic acid metabolic process;GO:1901605//alpha-amino acid metabolic process;GO:1901360//organic cyclic compound metabolic process;GO:0071704//or…
ENSGALG00000010051	MOCS1	PREDICTED: molybdenum cofactor biosynthesis protein 1 isoform X5 [Gallus gallus]	Metabolism;Genetic Information Processing	Folding, sorting and degradation;Metabolism of cofactors and vitamins;Global and Overview	ko01100//Metabolic pathways;ko00790//Folate biosynthesis;ko04122//Sulfur relay system	K03639	-	-	-
ENSGALG00000037953	TBA1B	tubulin alpha-1B chain [Mus musculus]	Cellular Processes	Cellular commiunity;Transport and catabolism	ko04145//Phagosome;ko04540//Gap junction	K07374	GO:0043229//intracellular organelle;GO:0005874//microtubule;GO:0044430//cytoskeletal part;GO:0015630//microtubule cytoskeleton;GO:0044464//cell part;GO:0044446//intracellular organelle part;GO:0005856//cytoskeleton;GO:0044422//organelle part;GO:0044424//intracellular part;GO:0099512//supramolecular fiber;GO:0099513//polymeric cytoskeletal fiber;GO:0005623//cell;GO:0043228//non-membrane-bounded or…	GO:0001882//nucleoside binding;GO:0003723//RNA binding;GO:0003676//nucleic acid binding;GO:0017111//nucleoside-triphosphatase activity;GO:0001883//purine nucleoside binding;GO:0032549//ribonucleoside binding;GO:0016817//hydrolase activity, acting on acid anhydrides;GO:0003824//catalytic activity;GO:0097159//organic cyclic compound binding;GO:0036094//small molecule binding;GO:0005488//binding;GO:…	GO:1901565//organonitrogen compound catabolic process;GO:0034655//nucleobase-containing compound catabolic process;GO:0071840//cellular component organization or biogenesis;GO:0070670//response to interleukin-4;GO:0009150//purine ribonucleotide metabolic process;GO:0006163//purine nucleotide metabolic process;GO:0046700//heterocycle catabolic process;GO:0044270//cellular nitrogen compound catabol…
ENSGALG00000044172	ADCYA	PREDICTED: adenylate cyclase type 10-like isoform X4 [Gallus gallus]	Metabolism	Nucleotide metabolism	ko00230//Purine metabolism	K11265	-	GO:0003824//catalytic activity;GO:0016829//lyase activity	GO:0050789//regulation of biological process;GO:0044699//single-organism process;GO:0023052//signaling;GO:0007165//signal transduction;GO:0065007//biological regulation;GO:0051716//cellular response to stimulus;GO:0044700//single organism signaling;GO:0050794//regulation of cellular process;GO:0044763//single-organism cellular process;GO:0050896//response to stimulus;GO:0009987//cellular process;…
ENSGALG00000045682	ADCYA	PREDICTED: adenylate cyclase type 10-like isoform X5 [Gallus gallus]	Metabolism	Nucleotide metabolism	ko00230//Purine metabolism	K11265	-	GO:0016829//lyase activity;GO:0003824//catalytic activity	GO:0050789//regulation of biological process;GO:0044763//single-organism cellular process;GO:0044699//single-organism process;GO:0050794//regulation of cellular process;GO:0044700//single organism signaling;GO:0065007//biological regulation;GO:0009987//cellular process;GO:0023052//signaling;GO:0050896//response to stimulus;GO:0007165//signal transduction;GO:0007154//cell communication;GO:0051716/…
ENSGALG00000044949	ADCYA	PREDICTED: adenylate cyclase type 10-like isoform X7 [Gallus gallus]	Metabolism	Nucleotide metabolism	ko00230//Purine metabolism	K11265	-	GO:0016829//lyase activity;GO:0003824//catalytic activity	GO:0044700//single organism signaling;GO:0050794//regulation of cellular process;GO:0007154//cell communication;GO:0007165//signal transduction;GO:0051716//cellular response to stimulus;GO:0044763//single-organism cellular process;GO:0044699//single-organism process;GO:0050789//regulation of biological process;GO:0050896//response to stimulus;GO:0009987//cellular process;GO:0065007//biological re…
ENSGALG00000012595	CBPC1	cytosolic carboxypeptidase 1 [Gallus gallus]	-	-	-	-	GO:0016471//vacuolar proton-transporting V-type ATPase complex;GO:0043226//organelle;GO:0043234//protein complex;GO:0043227//membrane-bounded organelle;GO:0005737//cytoplasm;GO:0098805//whole membrane;GO:0044424//intracellular part;GO:0044437//vacuolar part;GO:0044446//intracellular organelle part;GO:0098588//bounding membrane of organelle;GO:0005623//cell;GO:0005774//vacuolar membrane;GO:0032991…	GO:0005515//protein binding;GO:0008324//cation transmembrane transporter activity;GO:0043167//ion binding;GO:0043169//cation binding;GO:0008092//cytoskeletal protein binding;GO:0016787//hydrolase activity;GO:0008237//metallopeptidase activity;GO:0005215//transporter activity;GO:0022892//substrate-specific transporter activity;GO:0008235//metalloexopeptidase activity;GO:0022891//substrate-specific…	GO:0015992//proton transport;GO:0065008//regulation of biological quality;GO:0044260//cellular macromolecule metabolic process;GO:0007275//multicellular organism development;GO:0048513//animal organ development;GO:0071840//cellular component organization or biogenesis;GO:0015988//energy coupled proton transmembrane transport, against electrochemical gradient;GO:0007417//central nervous system dev…
ENSGALG00000044503	--	PREDICTED: uncharacterized protein LOC769646 isoform X1 [Gallus gallus]	-	-	-	-	-	-	-
ENSGALG00000015495	PIT1	pituitary specific transcription factor [Gallus gallus]	-	-	-	-	GO:0044464//cell part;GO:0043229//intracellular organelle;GO:0005622//intracellular;GO:0005623//cell;GO:0043227//membrane-bounded organelle;GO:0044424//intracellular part;GO:0043226//organelle;GO:0043231//intracellular membrane-bounded organelle	GO:0000989//transcription factor activity, transcription factor binding;GO:0001076//transcription factor activity, RNA polymerase II transcription factor binding;GO:0001104//RNA polymerase II transcription cofactor activity;GO:0003676//nucleic acid binding;GO:0008134//transcription factor binding;GO:0097159//organic cyclic compound binding;GO:0000988//transcription factor activity, protein bindin…	GO:0032958//inositol phosphate biosynthetic process;GO:0034645//cellular macromolecule biosynthetic process;GO:0046649//lymphocyte activation;GO:0045165//cell fate commitment;GO:0009966//regulation of signal transduction;GO:0009987//cellular process;GO:0035270//endocrine system development;GO:0046483//heterocycle metabolic process;GO:0044763//single-organism cellular process;GO:0006793//phosphoru…
ENSGALG00000002187	DHB4	peroxisomal multifunctional enzyme type 2 [Gallus gallus]	Cellular Processes;Metabolism	Transport and catabolism;Global and Overview;Lipid metabolism	ko01100//Metabolic pathways;ko04146//Peroxisome;ko00120//Primary bile acid biosynthesis	K12405	GO:0005622//intracellular;GO:0043231//intracellular membrane-bounded organelle;GO:0044438//microbody part;GO:0044444//cytoplasmic part;GO:0042579//microbody;GO:0005737//cytoplasm;GO:0044422//organelle part;GO:0043227//membrane-bounded organelle;GO:0043226//organelle;GO:0043229//intracellular organelle;GO:0044464//cell part;GO:0005623//cell;GO:0005777//peroxisome;GO:0044424//intracellular part;GO:…	GO:0016836//hydro-lyase activity;GO:0005496//steroid binding;GO:0016229//steroid dehydrogenase activity;GO:0016829//lyase activity;GO:0016491//oxidoreductase activity;GO:0016616//oxidoreductase activity, acting on the CH-OH group of donors, NAD or NADP as acceptor;GO:0003824//catalytic activity;GO:0008289//lipid binding;GO:0097159//organic cyclic compound binding;GO:0005515//protein binding;GO:00…	GO:0030154//cell differentiation;GO:0044238//primary metabolic process;GO:0009987//cellular process;GO:0030855//epithelial cell differentiation;GO:0044710//single-organism metabolic process;GO:0044699//single-organism process;GO:0035383//thioester metabolic process;GO:0060429//epithelium development;GO:0044242//cellular lipid catabolic process;GO:0006631//fatty acid metabolic process;GO:0019752//…
ENSGALG00000012575	TLE1	PREDICTED: transducin-like enhancer protein 1 isoformX2 [Gallus gallus]	-	-	-	-	GO:0043229//intracellular organelle;GO:0043231//intracellular membrane-bounded organelle;GO:0043234//protein complex;GO:0043227//membrane-bounded organelle;GO:0005623//cell;GO:0043226//organelle;GO:0005737//cytoplasm;GO:0005622//intracellular;GO:0032991//macromolecular complex;GO:0044444//cytoplasmic part;GO:0044424//intracellular part;GO:0044464//cell part	GO:0003712//transcription cofactor activity;GO:0001104//RNA polymerase II transcription cofactor activity;GO:0005488//binding;GO:0001076//transcription factor activity, RNA polymerase II transcription factor binding;GO:0000989//transcription factor activity, transcription factor binding;GO:0000988//transcription factor activity, protein binding;GO:0005515//protein binding	GO:0097659//nucleic acid-templated transcription;GO:0043067//regulation of programmed cell death;GO:0035556//intracellular signal transduction;GO:0006366//transcription from RNA polymerase II promoter;GO:0044699//single-organism process;GO:0043170//macromolecule metabolic process;GO:0019438//aromatic compound biosynthetic process;GO:0006351//transcription, DNA-templated;GO:0032774//RNA biosynthet…
ENSGALG00000014875	HCN1	PREDICTED: potassium/sodium hyperpolarization-activated cyclic nucleotide-gated channel 1 [Gallus gallus]	-	-	-	-	-	-	-
ENSGALG00000033256	PCSK5	PREDICTED: proprotein convertase subtilisin/kexin type 5 [Gallus gallus]	-	-	-	-	-	-	-
ENSGALG00000038840	--	hypothetical protein AS27_01255, partial [Aptenodytes forsteri]	-	-	-	-	-	-	-
ENSGALG00000015096	SH3G2	endophilin-A1 [Gallus gallus]	Cellular Processes	Transport and catabolism	ko04144//Endocytosis	K11247	GO:0005622//intracellular;GO:0044464//cell part;GO:0044424//intracellular part;GO:0005623//cell	GO:0005515//protein binding;GO:0005488//binding	GO:0006897//endocytosis;GO:0006810//transport;GO:0051234//establishment of localization;GO:0016192//vesicle-mediated transport;GO:0065007//biological regulation;GO:0050794//regulation of cellular process;GO:0051179//localization;GO:0019222//regulation of metabolic process;GO:0050789//regulation of biological process;GO:0031323//regulation of cellular metabolic process
ENSGALG00000046104	RHG32	PREDICTED: rho GTPase-activating protein 32-like, partial [Eurypyga helias]	-	-	-	-	-	-	-
ENSGALG00000015097	CNTLN	PREDICTED: centlein isoform X2 [Gallus gallus]	-	-	-	-	-	-	-
ENSGALG00000008005	FA65C	PREDICTED: protein FAM65C isoform X8 [Gallus gallus]	-	-	-	-	-	-	-
ENSGALG00000014862	HMCS1	Hydroxymethylglutaryl-CoA synthase, cytoplasmic, partial [Cathartes aura]	Metabolism	Metabolism of terpenoids and polyketides;Amino acid metabolism;Lipid metabolism;Carbohydrate metabolism;Global and Overview	ko01100//Metabolic pathways;ko01110//Biosynthesis of secondary metabolites;ko01130//Biosynthesis of antibiotics;ko00280//Valine, leucine and isoleucine degradation;ko00650//Butanoate metabolism;ko00900//Terpenoid backbone biosynthesis;ko00072//Synthesis and degradation of ketone bodies	K01641	GO:0043227//membrane-bounded organelle;GO:0044424//intracellular part;GO:0043226//organelle;GO:0043229//intracellular organelle;GO:0005622//intracellular;GO:0044464//cell part;GO:0016020//membrane;GO:0005623//cell;GO:0043231//intracellular membrane-bounded organelle	GO:0016746//transferase activity, transferring acyl groups;GO:0003824//catalytic activity;GO:0016740//transferase activity;GO:0046912//transferase activity, transferring acyl groups, acyl groups converted into alkyl on transfer	GO:0044237//cellular metabolic process;GO:0044699//single-organism process;GO:0044255//cellular lipid metabolic process;GO:1902652//secondary alcohol metabolic process;GO:0044238//primary metabolic process;GO:1901615//organic hydroxy compound metabolic process;GO:0006720//isoprenoid metabolic process;GO:0006066//alcohol metabolic process;GO:0044763//single-organism cellular process;GO:1901360//or…
ENSGALG00000005257	VCAM1	PREDICTED: vascular cell adhesion protein 1 isoform X2 [Gallus gallus]	Human Diseases;Environmental Information Processing	Signaling molecules and interaction;Endocrine and metabolic diseases	ko04514//Cell adhesion molecules (CAMs);ko04933//AGE-RAGE signaling pathway in diabetic complications	K06527	GO:0005737//cytoplasm;GO:0043234//protein complex;GO:0044464//cell part;GO:0044444//cytoplasmic part;GO:0005856//cytoskeleton;GO:0043229//intracellular organelle;GO:0005623//cell;GO:0005768//endosome;GO:0016020//membrane;GO:0015629//actin cytoskeleton;GO:0042995//cell projection;GO:0032991//macromolecular complex;GO:0043232//intracellular non-membrane-bounded organelle;GO:0031224//intrinsic compo…	GO:0016641//oxidoreductase activity, acting on the CH-NH2 group of donors, oxygen as acceptor;GO:0016491//oxidoreductase activity;GO:0005515//protein binding;GO:0005488//binding;GO:0005102//receptor binding;GO:0003824//catalytic activity;GO:0016638//oxidoreductase activity, acting on the CH-NH2 group of donors	GO:0044763//single-organism cellular process;GO:0042592//homeostatic process;GO:0071704//organic substance metabolic process;GO:0022406//membrane docking;GO:0070489//T cell aggregation;GO:0046651//lymphocyte proliferation;GO:0042110//T cell activation;GO:0048731//system development;GO:0048568//embryonic organ development;GO:0033500//carbohydrate homeostasis;GO:0048513//animal organ development;GO…
ENSGALG00000015892	IKBP1	interleukin-1 receptor-associated kinase 1 binding protein 1 [Gallus gallus]	-	-	-	-	-	-	GO:0051716//cellular response to stimulus;GO:0044763//single-organism cellular process;GO:0050794//regulation of cellular process;GO:0023052//signaling;GO:0035556//intracellular signal transduction;GO:0009987//cellular process;GO:0044699//single-organism process;GO:0007165//signal transduction;GO:0050896//response to stimulus;GO:0050789//regulation of biological process;GO:0044700//single organis…
ENSGALG00000005419	ERC2	PREDICTED: ERC protein 2 isoform X2 [Gallus gallus]	-	-	-	-	-	-	-
ENSGALG00000005280	ODB2	lipoamide acyltransferase component of branched-chain alpha-keto acid dehydrogenase complex, mitochondrial precursor [Gallus gallus]	Metabolism	Carbohydrate metabolism;Global and Overview;Amino acid metabolism	ko01100//Metabolic pathways;ko01110//Biosynthesis of secondary metabolites;ko01130//Biosynthesis of antibiotics;ko00280//Valine, leucine and isoleucine degradation;ko00640//Propanoate metabolism	K09699	GO:0044446//intracellular organelle part;GO:0005623//cell;GO:0043232//intracellular non-membrane-bounded organelle;GO:0005622//intracellular;GO:0044422//organelle part;GO:0043229//intracellular organelle;GO:0044464//cell part;GO:0005856//cytoskeleton;GO:0043231//intracellular membrane-bounded organelle;GO:0043227//membrane-bounded organelle;GO:0044424//intracellular part;GO:0031974//membrane-encl…	GO:0016740//transferase activity;GO:0003824//catalytic activity	-
ENSGALG00000032452	GAS7	PREDICTED: growth arrest-specific protein 7 isoform X1 [Gallus gallus]	-	-	-	-	GO:0005622//intracellular;GO:0044424//intracellular part;GO:0005856//cytoskeleton;GO:0005623//cell;GO:0043226//organelle;GO:0015629//actin cytoskeleton;GO:0043232//intracellular non-membrane-bounded organelle;GO:0043228//non-membrane-bounded organelle;GO:0031252//cell leading edge;GO:0043229//intracellular organelle;GO:0044464//cell part	GO:0005515//protein binding;GO:0008092//cytoskeletal protein binding;GO:0003779//actin binding;GO:0005488//binding	GO:0065007//biological regulation;GO:0050794//regulation of cellular process;GO:0022603//regulation of anatomical structure morphogenesis;GO:0044699//single-organism process;GO:0022008//neurogenesis;GO:0007275//multicellular organism development;GO:0044085//cellular component biogenesis;GO:0030154//cell differentiation;GO:0007399//nervous system development;GO:0048731//system development;GO:00507…
ENSGALG00000005646	TSC2	PREDICTED: LOW QUALITY PROTEIN: tuberin isoform X1 [Gallus gallus]	Environmental Information Processing;Organismal Systems;Cellular Processes	Signal transduction;Cell growth and death;Endocrine system	ko04910//Insulin signaling pathway;ko04115//p53 signaling pathway;ko04150//mTOR signaling pathway	K07207	-	-	-
ENSGALG00000043488	NEDD4	PREDICTED: E3 ubiquitin-protein ligase NEDD4 isoform X4 [Gallus gallus]	Cellular Processes;Genetic Information Processing	Folding, sorting and degradation;Transport and catabolism	ko04144//Endocytosis;ko04120//Ubiquitin mediated proteolysis	K10591	GO:0005622//intracellular;GO:0043227//membrane-bounded organelle;GO:0043226//organelle;GO:0043231//intracellular membrane-bounded organelle;GO:0044444//cytoplasmic part;GO:0005694//chromosome;GO:0044464//cell part;GO:0043232//intracellular non-membrane-bounded organelle;GO:0005737//cytoplasm;GO:0044424//intracellular part;GO:0044422//organelle part;GO:0043228//non-membrane-bounded organelle;GO:00…	GO:0019787//ubiquitin-like protein transferase activity;GO:0016597//amino acid binding;GO:0016247//channel regulator activity;GO:0032182//ubiquitin-like protein binding;GO:0031406//carboxylic acid binding;GO:0019899//enzyme binding;GO:0005515//protein binding;GO:0051219//phosphoprotein binding;GO:0005488//binding;GO:0043177//organic acid binding;GO:0008200//ion channel inhibitor activity;GO:00162…	GO:0014065//phosphatidylinositol 3-kinase signaling;GO:0051171//regulation of nitrogen compound metabolic process;GO:0050808//synapse organization;GO:0006508//proteolysis;GO:0050789//regulation of biological process;GO:0001568//blood vessel development;GO:0043412//macromolecule modification;GO:0030518//intracellular steroid hormone receptor signaling pathway;GO:0016482//cytoplasmic transport;GO:0…
ENSGALG00000010680	TTC7B	tetratricopeptide repeat protein 7B [Gallus gallus]	-	-	-	-	-	-	-
ENSGALG00000028810	CHCH2	PREDICTED: coiled-coil-helix-coiled-coil-helix domain-containing protein 10, mitochondrial-like isoform X2 [Gallus gallus]	-	-	-	-	-	-	GO:1901566//organonitrogen compound biosynthetic process;GO:0050790//regulation of catalytic activity;GO:0009150//purine ribonucleotide metabolic process;GO:0072521//purine-containing compound metabolic process;GO:0006807//nitrogen compound metabolic process;GO:0019637//organophosphate metabolic process;GO:0009259//ribonucleotide metabolic process;GO:0019222//regulation of metabolic process;GO:00…
ENSGALG00000037941	ZC3HA	PREDICTED: zinc finger CCCH domain-containing protein 10 [Gallus gallus]	-	-	-	-	GO:0005623//cell;GO:0044464//cell part;GO:0044424//intracellular part;GO:0005622//intracellular	GO:0005488//binding;GO:0043167//ion binding;GO:0043169//cation binding	-
ENSGALG00000046634	SPAG4	PREDICTED: sperm-associated antigen 4 protein-like isoform X1 [Gallus gallus]	-	-	-	-	-	-	-
ENSGALG00000005180	COBA1	PREDICTED: collagen alpha-1(XI) chain isoformX1 [Gallus gallus]	-	-	-	-	-	-	GO:0007275//multicellular organism development;GO:0048731//system development;GO:0044699//single-organism process;GO:0048856//anatomical structure development;GO:0032502//developmental process;GO:0044707//single-multicellular organism process;GO:0044767//single-organism developmental process;GO:0032501//multicellular organismal process;GO:0048513//animal organ development
ENSGALG00000014329	FOXJ2	PREDICTED: forkhead box protein J2 isoform X7 [Gallus gallus]	-	-	-	-	-	-	-
ENSGALG00000045884	IFNA1	interferon type A1/A2 precursor [Gallus gallus]	Human Diseases;Cellular Processes;Environmental Information Processing;Organismal Systems	Transport and catabolism;Infectious diseases;Immune system;Signaling molecules and interaction;Signal transduction	ko04060//Cytokine-cytokine receptor interaction;ko05168//Herpes simplex infection;ko05164//Influenza A;ko04630//Jak-STAT signaling pathway;ko04620//Toll-like receptor signaling pathway;ko04622//RIG-I-like receptor signaling pathway;ko04623//Cytosolic DNA-sensing pathway;ko04140//Regulation of autophagy	K05414	-	-	-
ENSGALG00000011626	COX18	PREDICTED: mitochondrial inner membrane protein COX18 [Meleagris gallopavo]	-	-	-	-	-	-	-
ENSGALG00000005284	LRC39	PREDICTED: leucine-rich repeat-containing protein 39 isoform X3 [Gallus gallus]	-	-	-	-	-	-	-
ENSGALG00000005800	DCA12	DDB1- and CUL4-associated factor 12 [Gallus gallus]	-	-	-	-	GO:0044424//intracellular part;GO:0043229//intracellular organelle;GO:0031461//cullin-RING ubiquitin ligase complex;GO:0044422//organelle part;GO:0043226//organelle;GO:0044464//cell part;GO:0044430//cytoskeletal part;GO:0000151//ubiquitin ligase complex;GO:0005856//cytoskeleton;GO:0015630//microtubule cytoskeleton;GO:1990234//transferase complex;GO:0043228//non-membrane-bounded organelle;GO:00056…	-	GO:0008152//metabolic process;GO:0043412//macromolecule modification;GO:0032446//protein modification by small protein conjugation;GO:0044260//cellular macromolecule metabolic process;GO:0043170//macromolecule metabolic process;GO:0036211//protein modification process;GO:0044238//primary metabolic process;GO:0006464//cellular protein modification process;GO:0071704//organic substance metabolic pr…
ENSGALG00000009752	C1GLT	glycoprotein-N-acetylgalactosamine 3-beta-galactosyltransferase 1 [Gallus gallus]	Metabolism	Global and Overview;Glycan biosynthesis and metabolism	ko01100//Metabolic pathways;ko00512//Mucin type O-glycan biosynthesis	K00731	GO:0016020//membrane;GO:0044425//membrane part;GO:0031224//intrinsic component of membrane	GO:0003824//catalytic activity;GO:0043169//cation binding;GO:0016758//transferase activity, transferring hexosyl groups;GO:0008378//galactosyltransferase activity;GO:0043167//ion binding;GO:0048531//beta-1,3-galactosyltransferase activity;GO:0005488//binding;GO:0016757//transferase activity, transferring glycosyl groups;GO:0016740//transferase activity	GO:0044699//single-organism process;GO:0036211//protein modification process;GO:0008152//metabolic process;GO:0009987//cellular process;GO:0019538//protein metabolic process;GO:0009653//anatomical structure morphogenesis;GO:0044767//single-organism developmental process;GO:0044260//cellular macromolecule metabolic process;GO:0044238//primary metabolic process;GO:0006464//cellular protein modifica…
ENSGALG00000014192	AT10D	PREDICTED: probable phospholipid-transporting ATPase VD isoform X3 [Gallus gallus]	-	-	-	-	GO:0005623//cell;GO:0043231//intracellular membrane-bounded organelle;GO:0005622//intracellular;GO:0016020//membrane;GO:0044425//membrane part;GO:0043229//intracellular organelle;GO:0044464//cell part;GO:0043226//organelle;GO:0043227//membrane-bounded organelle;GO:0031224//intrinsic component of membrane;GO:0044424//intracellular part	GO:0032550//purine ribonucleoside binding;GO:0008324//cation transmembrane transporter activity;GO:0032549//ribonucleoside binding;GO:0005319//lipid transporter activity;GO:0022892//substrate-specific transporter activity;GO:0046872//metal ion binding;GO:0043169//cation binding;GO:0022891//substrate-specific transmembrane transporter activity;GO:0022857//transmembrane transporter activity;GO:0036…	GO:0071702//organic substance transport;GO:0015914//phospholipid transport;GO:0015748//organophosphate ester transport;GO:0010876//lipid localization;GO:0051179//localization;GO:0006820//anion transport;GO:0051234//establishment of localization;GO:0006869//lipid transport;GO:0044699//single-organism process;GO:0015711//organic anion transport;GO:0006811//ion transport;GO:0033036//macromolecule lo…
ENSGALG00000044129	MRO2B	PREDICTED: maestro heat-like repeat-containing protein family member 2B-like isoform X5 [Gallus gallus]	-	-	-	-	-	-	-
ENSGALG00000045857	RM19	PREDICTED: 39S ribosomal protein L19, mitochondrial [Eurypyga helias]	Genetic Information Processing	Translation	ko03010//Ribosome	K02884	-	-	-
ENSGALG00000037015	DACH1	dachshund homolog 1 [Gallus gallus]	-	-	-	-	GO:0043229//intracellular organelle;GO:0044422//organelle part;GO:0043226//organelle;GO:0044446//intracellular organelle part;GO:0043227//membrane-bounded organelle;GO:0043231//intracellular membrane-bounded organelle;GO:0032991//macromolecular complex;GO:0044424//intracellular part;GO:0043234//protein complex;GO:0070013//intracellular organelle lumen;GO:0031981//nuclear lumen;GO:0031974//membran…	GO:0000983//transcription factor activity, RNA polymerase II core promoter sequence-specific;GO:0005488//binding;GO:0097159//organic cyclic compound binding;GO:0003676//nucleic acid binding;GO:1901363//heterocyclic compound binding;GO:0000982//transcription factor activity, RNA polymerase II core promoter proximal region sequence-specific binding;GO:0003700//transcription factor activity, sequenc…	GO:0060255//regulation of macromolecule metabolic process;GO:0018130//heterocycle biosynthetic process;GO:0051252//regulation of RNA metabolic process;GO:0016070//RNA metabolic process;GO:0022414//reproductive process;GO:0080090//regulation of primary metabolic process;GO:0045934//negative regulation of nucleobase-containing compound metabolic process;GO:0032774//RNA biosynthetic process;GO:00104…
ENSGALG00000016238	MED14	PREDICTED: mediator of RNA polymerase II transcription subunit 14 [Gallus gallus]	-	-	-	-	GO:0005623//cell;GO:0044424//intracellular part;GO:0032991//macromolecular complex;GO:0044464//cell part;GO:0043231//intracellular membrane-bounded organelle;GO:0005622//intracellular;GO:0043229//intracellular organelle;GO:0043226//organelle;GO:0043234//protein complex;GO:0043227//membrane-bounded organelle	GO:0008134//transcription factor binding;GO:0003712//transcription cofactor activity;GO:0005515//protein binding;GO:0000988//transcription factor activity, protein binding;GO:0005488//binding;GO:0000989//transcription factor activity, transcription factor binding	GO:0071396//cellular response to lipid;GO:0034645//cellular macromolecule biosynthetic process;GO:0097659//nucleic acid-templated transcription;GO:0006807//nitrogen compound metabolic process;GO:0032870//cellular response to hormone stimulus;GO:0006351//transcription, DNA-templated;GO:0042221//response to chemical;GO:0050896//response to stimulus;GO:0007154//cell communication;GO:1901576//organic…
ENSGALG00000016853	ABHDD	alpha/beta hydrolase domain-containing protein 13 [Gallus gallus]	-	-	-	-	GO:0016020//membrane;GO:0031224//intrinsic component of membrane;GO:0044425//membrane part	GO:0003824//catalytic activity	-
ENSGALG00000035136	CI084	chromosome 9 open reading frame 84 [Macaca mulatta]	-	-	-	-	-	-	-
ENSGALG00000042400	CSKP	PREDICTED: peripheral plasma membrane protein CASK isoform X2 [Chrysemys picta bellii]	Cellular Processes	Cellular commiunity	ko04530//Tight junction	K06103	GO:0044464//cell part;GO:0044421//extracellular region part;GO:0098589//membrane region;GO:0043233//organelle lumen;GO:0005576//extracellular region;GO:0031981//nuclear lumen;GO:0044424//intracellular part;GO:0016020//membrane;GO:0005578//proteinaceous extracellular matrix;GO:0030054//cell junction;GO:0005623//cell;GO:0045202//synapse;GO:0044425//membrane part;GO:0098590//plasma membrane region;G…	GO:0032550//purine ribonucleoside binding;GO:0097159//organic cyclic compound binding;GO:0005515//protein binding;GO:0016772//transferase activity, transferring phosphorus-containing groups;GO:0016773//phosphotransferase activity, alcohol group as acceptor;GO:0003824//catalytic activity;GO:1901363//heterocyclic compound binding;GO:0005488//binding;GO:0004672//protein kinase activity;GO:0032549//r…	GO:0090304//nucleic acid metabolic process;GO:0048523//negative regulation of cellular process;GO:0065007//biological regulation;GO:0006725//cellular aromatic compound metabolic process;GO:1901360//organic cyclic compound metabolic process;GO:0036211//protein modification process;GO:0070838//divalent metal ion transport;GO:0055086//nucleobase-containing small molecule metabolic process;GO:0042127…
ENSGALG00000039029	T2R40	PREDICTED: taste receptor type 2 member 40-like [Gallus gallus]	-	-	-	-	GO:0044425//membrane part;GO:0016020//membrane;GO:0031224//intrinsic component of membrane	GO:0060089//molecular transducer activity;GO:0099600//transmembrane receptor activity;GO:0038023//signaling receptor activity;GO:0004872//receptor activity;GO:0004888//transmembrane signaling receptor activity;GO:0004871//signal transducer activity	GO:0044699//single-organism process;GO:0065007//biological regulation;GO:0050789//regulation of biological process;GO:0050896//response to stimulus;GO:0050794//regulation of cellular process;GO:0007154//cell communication;GO:0051716//cellular response to stimulus;GO:0007600//sensory perception;GO:0009987//cellular process;GO:0050877//neurological system process;GO:0044700//single organism signali…
ENSGALG00000045129	RTCA	PREDICTED: RNA 3'-terminal phosphate cyclase [Meleagris gallopavo]	-	-	-	-	GO:0044424//intracellular part;GO:0043231//intracellular membrane-bounded organelle;GO:0043227//membrane-bounded organelle;GO:0043226//organelle;GO:0005623//cell;GO:0005622//intracellular;GO:0044464//cell part;GO:0043229//intracellular organelle	GO:0005488//binding;GO:0003824//catalytic activity;GO:1901363//heterocyclic compound binding;GO:0009975//cyclase activity;GO:0001882//nucleoside binding;GO:0097159//organic cyclic compound binding;GO:0036094//small molecule binding;GO:0097367//carbohydrate derivative binding;GO:0001883//purine nucleoside binding;GO:0032549//ribonucleoside binding;GO:0032550//purine ribonucleoside binding	GO:0043170//macromolecule metabolic process;GO:0071704//organic substance metabolic process;GO:0008152//metabolic process;GO:0010467//gene expression
ENSGALG00000026928	KLF4	PREDICTED: Krueppel-like factor 4 isoform X2 [Gallus gallus]	-	-	-	-	GO:0005623//cell;GO:0043226//organelle;GO:0005694//chromosome;GO:0005622//intracellular;GO:0044464//cell part;GO:0043232//intracellular non-membrane-bounded organelle;GO:0000785//chromatin;GO:0043229//intracellular organelle;GO:0032991//macromolecular complex;GO:0044427//chromosomal part;GO:0044424//intracellular part;GO:0043228//non-membrane-bounded organelle;GO:0044446//intracellular organelle …	GO:0000989//transcription factor activity, transcription factor binding;GO:0000976//transcription regulatory region sequence-specific DNA binding;GO:0008134//transcription factor binding;GO:0003690//double-stranded DNA binding;GO:0003676//nucleic acid binding;GO:0001134//transcription factor activity, transcription factor recruiting;GO:0043565//sequence-specific DNA binding;GO:0044212//transcript…	GO:0050896//response to stimulus;GO:0008152//metabolic process;GO:0001818//negative regulation of cytokine production;GO:0006366//transcription from RNA polymerase II promoter;GO:0050789//regulation of biological process;GO:0009893//positive regulation of metabolic process;GO:0031326//regulation of cellular biosynthetic process;GO:0009891//positive regulation of biosynthetic process;GO:0051171//r…
ENSGALG00000016375	PHEX	phosphate regulating endopeptidase homolog, X-linked [Gallus gallus]	-	-	-	-	GO:0005623//cell;GO:0043231//intracellular membrane-bounded organelle;GO:0043226//organelle;GO:0043229//intracellular organelle;GO:0043227//membrane-bounded organelle;GO:0044424//intracellular part;GO:0005737//cytoplasm;GO:0005622//intracellular;GO:0044444//cytoplasmic part;GO:0044464//cell part	GO:0070011//peptidase activity, acting on L-amino acid peptides;GO:0004175//endopeptidase activity;GO:0003824//catalytic activity;GO:0016787//hydrolase activity;GO:0008233//peptidase activity	GO:0044238//primary metabolic process;GO:0016485//protein processing;GO:0009987//cellular process;GO:0008152//metabolic process;GO:0071704//organic substance metabolic process;GO:0044699//single-organism process;GO:0043170//macromolecule metabolic process;GO:0032501//multicellular organismal process;GO:0044237//cellular metabolic process;GO:0006793//phosphorus metabolic process;GO:0044707//single…
ENSGALG00000013245	IFNA1	interferon type A1/A2 precursor [Gallus gallus]	Human Diseases;Cellular Processes;Environmental Information Processing;Organismal Systems	Signal transduction;Signaling molecules and interaction;Infectious diseases;Transport and catabolism;Immune system	ko04060//Cytokine-cytokine receptor interaction;ko05168//Herpes simplex infection;ko05164//Influenza A;ko04630//Jak-STAT signaling pathway;ko04620//Toll-like receptor signaling pathway;ko04622//RIG-I-like receptor signaling pathway;ko04623//Cytosolic DNA-sensing pathway;ko04140//Regulation of autophagy	K05414	-	-	-
ENSGALG00000014681	NEC1	PREDICTED: neuroendocrine convertase 1 [Gallus gallus]	-	-	-	-	GO:0005576//extracellular region;GO:0044421//extracellular region part	GO:0070011//peptidase activity, acting on L-amino acid peptides;GO:0008233//peptidase activity;GO:0004175//endopeptidase activity;GO:0003824//catalytic activity;GO:0016787//hydrolase activity	GO:0044238//primary metabolic process;GO:0071704//organic substance metabolic process;GO:0006807//nitrogen compound metabolic process;GO:0006518//peptide metabolic process;GO:0051604//protein maturation;GO:0009987//cellular process;GO:0043170//macromolecule metabolic process;GO:0016485//protein processing;GO:0006508//proteolysis;GO:0034641//cellular nitrogen compound metabolic process;GO:0044237/…
ENSGALG00000015451	ZN462	PREDICTED: zinc finger protein 462 isoform X12 [Gallus gallus]	-	-	-	-	GO:0005622//intracellular;GO:0005623//cell;GO:0043229//intracellular organelle;GO:0043226//organelle;GO:0043227//membrane-bounded organelle;GO:0044424//intracellular part;GO:0043231//intracellular membrane-bounded organelle;GO:0044464//cell part	GO:0005488//binding;GO:0043169//cation binding;GO:0043167//ion binding	GO:0044271//cellular nitrogen compound biosynthetic process;GO:0032774//RNA biosynthetic process;GO:0044238//primary metabolic process;GO:0018130//heterocycle biosynthetic process;GO:0065007//biological regulation;GO:0046483//heterocycle metabolic process;GO:0006139//nucleobase-containing compound metabolic process;GO:0071840//cellular component organization or biogenesis;GO:0006996//organelle or…
ENSGALG00000002294	SEM6A	PREDICTED: semaphorin-6A isoformX1 [Gallus gallus]	-	-	-	-	GO:0031224//intrinsic component of membrane;GO:0044425//membrane part;GO:0016021//integral component of membrane;GO:0016020//membrane	GO:0004872//receptor activity;GO:0005488//binding;GO:0004871//signal transducer activity;GO:0060089//molecular transducer activity;GO:0038023//signaling receptor activity;GO:0005515//protein binding;GO:0005102//receptor binding	GO:0007165//signal transduction;GO:0065007//biological regulation;GO:0050789//regulation of biological process;GO:0030335//positive regulation of cell migration;GO:0051640//organelle localization;GO:0048522//positive regulation of cellular process;GO:0051272//positive regulation of cellular component movement;GO:2000145//regulation of cell motility;GO:0030334//regulation of cell migration;GO:0044…
ENSGALG00000004347	NEDD4	PREDICTED: E3 ubiquitin-protein ligase NEDD4 isoform X3 [Gallus gallus]	Cellular Processes;Genetic Information Processing	Folding, sorting and degradation;Transport and catabolism	ko04144//Endocytosis;ko04120//Ubiquitin mediated proteolysis	K10591	GO:0043227//membrane-bounded organelle;GO:0043228//non-membrane-bounded organelle;GO:0044446//intracellular organelle part;GO:0044427//chromosomal part;GO:0044464//cell part;GO:0044444//cytoplasmic part;GO:0044424//intracellular part;GO:0043232//intracellular non-membrane-bounded organelle;GO:0043226//organelle;GO:0044422//organelle part;GO:0005694//chromosome;GO:0043229//intracellular organelle;…	GO:0019787//ubiquitin-like protein transferase activity;GO:0045309//protein phosphorylated amino acid binding;GO:0001664//G-protein coupled receptor binding;GO:0031406//carboxylic acid binding;GO:0016740//transferase activity;GO:0016247//channel regulator activity;GO:0043167//ion binding;GO:0051219//phosphoprotein binding;GO:0016248//channel inhibitor activity;GO:0008200//ion channel inhibitor ac…	GO:0009725//response to hormone;GO:0051128//regulation of cellular component organization;GO:0051169//nuclear transport;GO:0009966//regulation of signal transduction;GO:0010556//regulation of macromolecule biosynthetic process;GO:1903506//regulation of nucleic acid-templated transcription;GO:0009987//cellular process;GO:0050793//regulation of developmental process;GO:0050896//response to stimulus…
ENSGALG00000010178	K0020	pumilio domain-containing protein KIAA0020 [Gallus gallus]	-	-	-	-	-	GO:0003676//nucleic acid binding;GO:1901363//heterocyclic compound binding;GO:0097159//organic cyclic compound binding;GO:0005488//binding	-
ENSGALG00000020879	ZNT7	zinc transporter 7 [Gallus gallus]	-	-	-	-	GO:0005622//intracellular;GO:0044424//intracellular part;GO:0016020//membrane;GO:0031224//intrinsic component of membrane;GO:0005737//cytoplasm;GO:0044444//cytoplasmic part;GO:0043226//organelle;GO:0043229//intracellular organelle;GO:0044464//cell part;GO:0005623//cell;GO:0044425//membrane part;GO:0043227//membrane-bounded organelle;GO:0043231//intracellular membrane-bounded organelle	GO:0022892//substrate-specific transporter activity;GO:0022891//substrate-specific transmembrane transporter activity;GO:0015075//ion transmembrane transporter activity;GO:0022857//transmembrane transporter activity;GO:0005215//transporter activity	GO:0006873//cellular ion homeostasis;GO:0050801//ion homeostasis;GO:0055069//zinc ion homeostasis;GO:0044699//single-organism process;GO:0055076//transition metal ion homeostasis;GO:0006811//ion transport;GO:0065008//regulation of biological quality;GO:1902578//single-organism localization;GO:0044763//single-organism cellular process;GO:0072503//cellular divalent inorganic cation homeostasis;GO:0…
ENSGALG00000033669	IFNA1	interferon type A1/A2 precursor [Gallus gallus]	Human Diseases;Cellular Processes;Organismal Systems;Environmental Information Processing	Signal transduction;Signaling molecules and interaction;Transport and catabolism;Immune system;Infectious diseases	ko04060//Cytokine-cytokine receptor interaction;ko05168//Herpes simplex infection;ko05164//Influenza A;ko04630//Jak-STAT signaling pathway;ko04620//Toll-like receptor signaling pathway;ko04622//RIG-I-like receptor signaling pathway;ko04623//Cytosolic DNA-sensing pathway;ko04140//Regulation of autophagy	K05414	-	-	-
ENSGALG00000005589	SNG3	synaptogyrin-3 [Gallus gallus]	-	-	-	-	GO:0016020//membrane;GO:0044424//intracellular part;GO:0043229//intracellular organelle;GO:0043231//intracellular membrane-bounded organelle;GO:0045202//synapse;GO:0031410//cytoplasmic vesicle;GO:0043227//membrane-bounded organelle;GO:0031224//intrinsic component of membrane;GO:0030135//coated vesicle;GO:0044444//cytoplasmic part;GO:0031982//vesicle;GO:0005622//intracellular;GO:0016023//cytoplasm…	GO:0005515//protein binding;GO:0019904//protein domain specific binding;GO:0005488//binding	GO:0051049//regulation of transport;GO:0065009//regulation of molecular function;GO:0032409//regulation of transporter activity;GO:0032879//regulation of localization;GO:0050789//regulation of biological process;GO:0065007//biological regulation
ENSGALG00000011533	XRCC3	DNA repair protein XRCC3 [Gallus gallus]	Genetic Information Processing	Replication and repair	ko03440//Homologous recombination	K10880	GO:0043231//intracellular membrane-bounded organelle;GO:0005737//cytoplasm;GO:0044444//cytoplasmic part;GO:0005623//cell;GO:0043227//membrane-bounded organelle;GO:0043229//intracellular organelle;GO:0005622//intracellular;GO:0044464//cell part;GO:0043226//organelle;GO:0044424//intracellular part	GO:0016817//hydrolase activity, acting on acid anhydrides;GO:0032549//ribonucleoside binding;GO:0042623//ATPase activity, coupled;GO:0003824//catalytic activity;GO:0097159//organic cyclic compound binding;GO:0001882//nucleoside binding;GO:0001883//purine nucleoside binding;GO:0005488//binding;GO:0016787//hydrolase activity;GO:1901363//heterocyclic compound binding;GO:0097367//carbohydrate derivat…	GO:0006807//nitrogen compound metabolic process;GO:0071704//organic substance metabolic process;GO:0043170//macromolecule metabolic process;GO:0009987//cellular process;GO:0044260//cellular macromolecule metabolic process;GO:0008152//metabolic process;GO:0046483//heterocycle metabolic process;GO:0044237//cellular metabolic process;GO:0034641//cellular nitrogen compound metabolic process;GO:009030…
ENSGALG00000005290	TRM13	PREDICTED: tRNA:m(4)X modification enzyme TRM13 homolog isoform X2 [Gallus gallus]	-	-	-	-	-	-	-
ENSGALG00000032699	CDK2	cyclin-dependent kinase 2 [Gallus gallus]	Human Diseases;Organismal Systems;Environmental Information Processing;Cellular Processes	Infectious diseases;Signal transduction;Endocrine system;Cell growth and death	ko05168//Herpes simplex infection;ko04068//FoxO signaling pathway;ko04110//Cell cycle;ko04114//Oocyte meiosis;ko04914//Progesterone-mediated oocyte maturation;ko04115//p53 signaling pathway	K02206	GO:0044451//nucleoplasm part;GO:0044422//organelle part;GO:0005622//intracellular;GO:0032991//macromolecular complex;GO:0043234//protein complex;GO:0031981//nuclear lumen;GO:0044427//chromosomal part;GO:0043226//organelle;GO:0043233//organelle lumen;GO:0015630//microtubule cytoskeleton;GO:0016604//nuclear body;GO:0043231//intracellular membrane-bounded organelle;GO:0005634//nucleus;GO:0005654//nu…	GO:0001883//purine nucleoside binding;GO:1901363//heterocyclic compound binding;GO:0097367//carbohydrate derivative binding;GO:0032550//purine ribonucleoside binding;GO:0016772//transferase activity, transferring phosphorus-containing groups;GO:0016773//phosphotransferase activity, alcohol group as acceptor;GO:0004672//protein kinase activity;GO:0036094//small molecule binding;GO:0043169//cation …	GO:0023052//signaling;GO:0045786//negative regulation of cell cycle;GO:0007165//signal transduction;GO:0071704//organic substance metabolic process;GO:0008283//cell proliferation;GO:0043632//modification-dependent macromolecule catabolic process;GO:1901362//organic cyclic compound biosynthetic process;GO:0030330//DNA damage response, signal transduction by p53 class mediator;GO:0044699//single-or…
ENSGALG00000015062	IFNA2	PREDICTED: interferon kappa-like isoform X1 [Gallus gallus]	Organismal Systems;Environmental Information Processing;Cellular Processes;Human Diseases	Signaling molecules and interaction;Signal transduction;Infectious diseases;Transport and catabolism;Immune system	ko04060//Cytokine-cytokine receptor interaction;ko05168//Herpes simplex infection;ko05164//Influenza A;ko04630//Jak-STAT signaling pathway;ko04620//Toll-like receptor signaling pathway;ko04622//RIG-I-like receptor signaling pathway;ko04623//Cytosolic DNA-sensing pathway;ko04140//Regulation of autophagy	K05414	-	-	-
ENSGALG00000036054	NIPLB	PREDICTED: nucleolar protein 58-like [Chaetura pelagica]	-	-	-	-	-	-	-
ENSGALG00000045339	--	-	-	-	-	-	-	-	-
ENSGALG00000044541	ADCYA	PREDICTED: adenylate cyclase type 10-like [Gallus gallus]	Metabolism	Nucleotide metabolism	ko00230//Purine metabolism	K11265	-	GO:0003824//catalytic activity;GO:0016829//lyase activity	GO:0007165//signal transduction;GO:0009987//cellular process;GO:0065007//biological regulation;GO:0007154//cell communication;GO:0050794//regulation of cellular process;GO:0044699//single-organism process;GO:0044700//single organism signaling;GO:0044763//single-organism cellular process;GO:0050789//regulation of biological process;GO:0023052//signaling;GO:0050896//response to stimulus;GO:0051716/…
ENSGALG00000005162	RBM40	PREDICTED: RNA-binding protein 40 isoform X10 [Gallus gallus]	-	-	-	-	GO:0043226//organelle;GO:0030529//intracellular ribonucleoprotein complex;GO:0043231//intracellular membrane-bounded organelle;GO:0044422//organelle part;GO:0005634//nucleus;GO:0005623//cell;GO:0043229//intracellular organelle;GO:0044424//intracellular part;GO:0044428//nuclear part;GO:1990904//ribonucleoprotein complex;GO:0044464//cell part;GO:0043227//membrane-bounded organelle;GO:0005622//intra…	GO:0005488//binding;GO:0097159//organic cyclic compound binding	-
ENSGALG00000037336	PRTG	protogenin precursor [Gallus gallus]	-	-	-	-	GO:0016020//membrane;GO:0044425//membrane part;GO:0031224//intrinsic component of membrane	-	GO:0032501//multicellular organismal process;GO:0044707//single-multicellular organism process;GO:0044699//single-organism process
ENSGALG00000004907	KCD15	KCTD15 transcript variant 2 [Gallus gallus]	-	-	-	-	-	-	GO:0022607//cellular component assembly;GO:0070271//protein complex biogenesis;GO:0065003//macromolecular complex assembly;GO:0009987//cellular process;GO:0016043//cellular component organization;GO:0051259//protein oligomerization;GO:0043933//macromolecular complex subunit organization;GO:0006461//protein complex assembly;GO:0044085//cellular component biogenesis;GO:0071822//protein complex subu…
ENSGALG00000038320	GT252	PREDICTED: procollagen galactosyltransferase 2 [Gallus gallus]	Metabolism	Glycan biosynthesis and metabolism;Amino acid metabolism	ko00310//Lysine degradation;ko00514//Other types of O-glycan biosynthesis	K11703	-	GO:0003824//catalytic activity	GO:0006629//lipid metabolic process;GO:0044699//single-organism process;GO:0009058//biosynthetic process;GO:0071704//organic substance metabolic process;GO:0044711//single-organism biosynthetic process;GO:0008152//metabolic process;GO:0044238//primary metabolic process;GO:1901576//organic substance biosynthetic process;GO:0008610//lipid biosynthetic process;GO:0044710//single-organism metabolic p…
ENSGALG00000005608	NHRF2	PREDICTED: Na(+)/H(+) exchange regulatory cofactor NHE-RF2 [Gallus gallus]	-	-	-	-	GO:0044464//cell part;GO:0005886//plasma membrane;GO:0043226//organelle;GO:0043227//membrane-bounded organelle;GO:0016020//membrane;GO:0043229//intracellular organelle;GO:0044424//intracellular part;GO:0005622//intracellular;GO:0005623//cell;GO:0071944//cell periphery;GO:0043231//intracellular membrane-bounded organelle	GO:0005515//protein binding;GO:0019899//enzyme binding;GO:0005488//binding	GO:0014065//phosphatidylinositol 3-kinase signaling;GO:0048015//phosphatidylinositol-mediated signaling;GO:0044699//single-organism process;GO:0065007//biological regulation;GO:0044700//single organism signaling;GO:0007165//signal transduction;GO:0009987//cellular process;GO:0050789//regulation of biological process;GO:0050794//regulation of cellular process;GO:0023052//signaling;GO:0035556//intr…
ENSGALG00000014869	NNTM	PREDICTED: NAD(P) transhydrogenase, mitochondrial isoform X2 [Gallus gallus]	Metabolism	Metabolism of cofactors and vitamins;Global and Overview	ko01100//Metabolic pathways;ko00760//Nicotinate and nicotinamide metabolism	K00323	GO:0031090//organelle membrane;GO:0044424//intracellular part;GO:0031975//envelope;GO:0031224//intrinsic component of membrane;GO:0016020//membrane;GO:0043229//intracellular organelle;GO:0044464//cell part;GO:0043226//organelle;GO:0044446//intracellular organelle part;GO:0044425//membrane part;GO:0044422//organelle part;GO:0043227//membrane-bounded organelle;GO:0005623//cell;GO:0005622//intracell…	GO:1901265//nucleoside phosphate binding;GO:0097159//organic cyclic compound binding;GO:0005488//binding;GO:0000166//nucleotide binding;GO:0016651//oxidoreductase activity, acting on NAD(P)H;GO:0003824//catalytic activity;GO:0016491//oxidoreductase activity;GO:1901363//heterocyclic compound binding;GO:0016652//oxidoreductase activity, acting on NAD(P)H, NAD(P) as acceptor;GO:0008746//NAD(P)+ tran…	GO:0051179//localization;GO:0009987//cellular process;GO:0044765//single-organism transport;GO:1902578//single-organism localization;GO:0044699//single-organism process;GO:0051234//establishment of localization;GO:0006810//transport;GO:0008152//metabolic process;GO:0006818//hydrogen transport;GO:0044237//cellular metabolic process;GO:0044710//single-organism metabolic process
ENSGALG00000031737	MUC5A	PREDICTED: mucin-5AC, partial [Anas platyrhynchos]	-	-	-	-	-	-	-
ENSGALG00000015184	TLE4	transducin-like enhancer protein 4 [Gallus gallus]	-	-	-	-	GO:0044428//nuclear part;GO:0070013//intracellular organelle lumen;GO:0005623//cell;GO:0044464//cell part;GO:0043231//intracellular membrane-bounded organelle;GO:0043229//intracellular organelle;GO:0044424//intracellular part;GO:0031974//membrane-enclosed lumen;GO:0005622//intracellular;GO:0044422//organelle part;GO:0044446//intracellular organelle part;GO:0005634//nucleus;GO:0043233//organelle l…	GO:0003700//transcription factor activity, sequence-specific DNA binding;GO:0005515//protein binding;GO:0003712//transcription cofactor activity;GO:0005488//binding;GO:0000989//transcription factor activity, transcription factor binding;GO:0008134//transcription factor binding;GO:0000988//transcription factor activity, protein binding;GO:0001071//nucleic acid binding transcription factor activity…	GO:0008152//metabolic process;GO:0050794//regulation of cellular process;GO:0006807//nitrogen compound metabolic process;GO:0097659//nucleic acid-templated transcription;GO:1901576//organic substance biosynthetic process;GO:0044699//single-organism process;GO:0019438//aromatic compound biosynthetic process;GO:0009059//macromolecule biosynthetic process;GO:0032774//RNA biosynthetic process;GO:1901…
ENSGALG00000015205	TYRP1	5,6-dihydroxyindole-2-carboxylic acid oxidase precursor [Gallus gallus]	Organismal Systems;Metabolism	Amino acid metabolism;Global and Overview;Endocrine system	ko01100//Metabolic pathways;ko04916//Melanogenesis;ko00350//Tyrosine metabolism	K00506	GO:0043226//organelle;GO:0098588//bounding membrane of organelle;GO:0012505//endomembrane system;GO:0044464//cell part;GO:0005768//endosome;GO:0030135//coated vesicle;GO:0031090//organelle membrane;GO:0044422//organelle part;GO:0005623//cell;GO:0044433//cytoplasmic vesicle part;GO:0098805//whole membrane;GO:0044440//endosomal part;GO:0005622//intracellular;GO:0043227//membrane-bounded organelle;G…	GO:0046983//protein dimerization activity;GO:0046872//metal ion binding;GO:0043167//ion binding;GO:0016491//oxidoreductase activity;GO:0005488//binding;GO:0004497//monooxygenase activity;GO:0043169//cation binding;GO:0005515//protein binding;GO:0003824//catalytic activity;GO:0046914//transition metal ion binding	GO:0048869//cellular developmental process;GO:0009987//cellular process;GO:0016050//vesicle organization;GO:0018958//phenol-containing compound metabolic process;GO:0030154//cell differentiation;GO:0006582//melanin metabolic process;GO:0006725//cellular aromatic compound metabolic process;GO:0008152//metabolic process;GO:0006996//organelle organization;GO:0043436//oxoacid metabolic process;GO:004…
ENSGALG00000014845	PLCX3	PREDICTED: PI-PLC X domain-containing protein 3 [Gallus gallus]	-	-	-	-	-	GO:0042578//phosphoric ester hydrolase activity;GO:0003824//catalytic activity;GO:0016788//hydrolase activity, acting on ester bonds;GO:0016787//hydrolase activity	GO:0044238//primary metabolic process;GO:0008152//metabolic process
ENSGALG00000041736	FSTL5	PREDICTED: follistatin-related protein 5 isoformX2 [Gallus gallus]	-	-	-	-	-	GO:0043167//ion binding;GO:0046872//metal ion binding;GO:0043169//cation binding;GO:0005488//binding	-
ENSGALG00000019261	RHG08	rho GTPase-activating protein 8 [Gallus gallus]	-	-	-	-	GO:0044464//cell part;GO:0005623//cell	-	GO:0044699//single-organism process;GO:0044763//single-organism cellular process;GO:0007154//cell communication;GO:0009987//cellular process
ENSGALG00000011511	KCRB	creatine kinase B-type [Gallus gallus]	Metabolism	Amino acid metabolism;Global and Overview	ko01100//Metabolic pathways;ko00330//Arginine and proline metabolism	K00933	GO:0005623//cell;GO:0043229//intracellular organelle;GO:0044464//cell part;GO:0044424//intracellular part;GO:0043226//organelle;GO:0043231//intracellular membrane-bounded organelle;GO:0043227//membrane-bounded organelle;GO:0005622//intracellular	GO:0001882//nucleoside binding;GO:0005488//binding;GO:0016772//transferase activity, transferring phosphorus-containing groups;GO:0032549//ribonucleoside binding;GO:0032550//purine ribonucleoside binding;GO:0001883//purine nucleoside binding;GO:0036094//small molecule binding;GO:0016740//transferase activity;GO:0097367//carbohydrate derivative binding;GO:0003824//catalytic activity;GO:0097159//or…	-
ENSGALG00000006717	MUC5B	PREDICTED: mucin-5B isoform X1 [Gallus gallus]	-	-	-	-	-	-	-
ENSGALG00000041564	MA1A2	PREDICTED: mannosyl-oligosaccharide 1,2-alpha-mannosidase IB [Gallus gallus]	Metabolism;Genetic Information Processing	Glycan biosynthesis and metabolism;Folding, sorting and degradation;Global and Overview	ko01100//Metabolic pathways;ko04141//Protein processing in endoplasmic reticulum;ko00510//N-Glycan biosynthesis	K01230	GO:0043229//intracellular organelle;GO:0044422//organelle part;GO:0043226//organelle;GO:0043233//organelle lumen;GO:0044424//intracellular part;GO:0043231//intracellular membrane-bounded organelle;GO:0005623//cell;GO:0043227//membrane-bounded organelle;GO:0044428//nuclear part;GO:0044446//intracellular organelle part;GO:0031974//membrane-enclosed lumen;GO:0044431//Golgi apparatus part;GO:0005737/…	GO:0016798//hydrolase activity, acting on glycosyl bonds;GO:0043169//cation binding;GO:0043167//ion binding;GO:0004553//hydrolase activity, hydrolyzing O-glycosyl compounds;GO:0046872//metal ion binding;GO:0004559//alpha-mannosidase activity;GO:0003824//catalytic activity;GO:0005488//binding;GO:0015923//mannosidase activity;GO:0015924//mannosyl-oligosaccharide mannosidase activity;GO:0016787//hyd…	GO:0008152//metabolic process;GO:0035295//tube development;GO:0044699//single-organism process;GO:0044707//single-multicellular organism process;GO:0048856//anatomical structure development;GO:0044767//single-organism developmental process;GO:0048513//animal organ development;GO:0007275//multicellular organism development;GO:0043170//macromolecule metabolic process;GO:0019538//protein metabolic p…
ENSGALG00000031707	DHH	PREDICTED: desert hedgehog protein, partial [Meleagris gallopavo]	Environmental Information Processing	Signal transduction	ko04340//Hedgehog signaling pathway	K11990	GO:0016020//membrane	GO:0005515//protein binding;GO:0005102//receptor binding;GO:0003824//catalytic activity;GO:0046914//transition metal ion binding;GO:0046872//metal ion binding;GO:0005488//binding;GO:0043167//ion binding;GO:0016787//hydrolase activity;GO:0043169//cation binding	GO:0044763//single-organism cellular process;GO:0007281//germ cell development;GO:0050896//response to stimulus;GO:0006629//lipid metabolic process;GO:0007165//signal transduction;GO:0032501//multicellular organismal process;GO:0048856//anatomical structure development;GO:0043170//macromolecule metabolic process;GO:0044238//primary metabolic process;GO:0030908//protein splicing;GO:0019953//sexual…
ENSGALG00000026689	IFNA3	PREDICTED: interferon type A3-like [Gallus gallus]	Human Diseases;Cellular Processes;Organismal Systems;Environmental Information Processing	Infectious diseases;Transport and catabolism;Immune system;Signal transduction;Signaling molecules and interaction	ko04060//Cytokine-cytokine receptor interaction;ko05168//Herpes simplex infection;ko05164//Influenza A;ko04630//Jak-STAT signaling pathway;ko04620//Toll-like receptor signaling pathway;ko04622//RIG-I-like receptor signaling pathway;ko04623//Cytosolic DNA-sensing pathway;ko04140//Regulation of autophagy	K05414	-	-	-
ENSGALG00000045282	CCD81	PREDICTED: coiled-coil domain-containing protein 81-like [Gallus gallus]	-	-	-	-	-	-	-
ENSGALG00000023886	Z804A	PREDICTED: zinc finger protein 804A isoform X4 [Gallus gallus]	-	-	-	-	-	GO:0043167//ion binding;GO:0005488//binding;GO:0043169//cation binding	-
ENSGALG00000020922	CA021	chromosome 1 open reading frame 21 [Xenopus laevis]	-	-	-	-	-	-	-
ENSGALG00000005347	ATS18	PREDICTED: A disintegrin and metalloproteinase with thrombospondin motifs 18 isoform X2 [Gallus gallus]	-	-	-	-	GO:0031012//extracellular matrix	GO:0003824//catalytic activity;GO:0008233//peptidase activity;GO:0004175//endopeptidase activity;GO:0043167//ion binding;GO:0046872//metal ion binding;GO:0005488//binding;GO:0016787//hydrolase activity;GO:0046914//transition metal ion binding;GO:0070011//peptidase activity, acting on L-amino acid peptides;GO:0043169//cation binding	-
ENSGALG00000011528	KLC1	PREDICTED: kinesin light chain 1 isoform X8 [Gallus gallus]	Human Diseases	Infectious diseases	ko05132//Salmonella infection	K10407	-	-	-
ENSGALG00000033247	FMRF	Immunoglobulin G-binding protein A [Larimichthys crocea]	-	-	-	-	-	-	-
ENSGALG00000040725	TAF4	PREDICTED: transcription initiation factor TFIID subunit 4-like [Gallus gallus]	Human Diseases;Genetic Information Processing	Transcription;Infectious diseases	ko05168//Herpes simplex infection;ko03022//Basal transcription factors	K03129	-	-	-
ENSGALG00000006165	WDFY4	PREDICTED: LOW QUALITY PROTEIN: WD repeat- and FYVE domain-containing protein 4 [Gallus gallus]	-	-	-	-	-	-	-
ENSGALG00000009650	PALLD	PREDICTED: palladin isoform X5 [Gallus gallus]	-	-	-	-	GO:0005623//cell;GO:0044464//cell part;GO:0005856//cytoskeleton;GO:0043232//intracellular non-membrane-bounded organelle;GO:0044424//intracellular part;GO:0005622//intracellular;GO:0043229//intracellular organelle;GO:0043228//non-membrane-bounded organelle;GO:0015629//actin cytoskeleton;GO:0043226//organelle	-	-
ENSGALG00000005806	KIF24	PREDICTED: kinesin family member 24 [Gallus gallus]	-	-	-	-	GO:0015630//microtubule cytoskeleton;GO:0043234//protein complex;GO:0043232//intracellular non-membrane-bounded organelle;GO:0043228//non-membrane-bounded organelle;GO:0044424//intracellular part;GO:0032991//macromolecular complex;GO:0005875//microtubule associated complex;GO:0044430//cytoskeletal part;GO:0005622//intracellular;GO:0044422//organelle part;GO:0044464//cell part;GO:0043226//organell…	GO:0001883//purine nucleoside binding;GO:0003824//catalytic activity;GO:0032550//purine ribonucleoside binding;GO:0036094//small molecule binding;GO:0016462//pyrophosphatase activity;GO:0005515//protein binding;GO:0032549//ribonucleoside binding;GO:0097159//organic cyclic compound binding;GO:1901363//heterocyclic compound binding;GO:0017111//nucleoside-triphosphatase activity;GO:0097367//carbohyd…	GO:0007017//microtubule-based process;GO:0009987//cellular process;GO:0044699//single-organism process;GO:0044763//single-organism cellular process
ENSGALG00000016232	RL8	60S ribosomal protein L8, partial [Corvus brachyrhynchos]	Genetic Information Processing	Translation	ko03010//Ribosome	K02938	GO:0032991//macromolecular complex;GO:0044464//cell part;GO:0044444//cytoplasmic part;GO:0043226//organelle;GO:0044422//organelle part;GO:0044391//ribosomal subunit;GO:0015934//large ribosomal subunit;GO:0005622//intracellular;GO:0043228//non-membrane-bounded organelle;GO:0043232//intracellular non-membrane-bounded organelle;GO:0005737//cytoplasm;GO:0043229//intracellular organelle;GO:0005623//ce…	GO:0003676//nucleic acid binding;GO:1901363//heterocyclic compound binding;GO:0097159//organic cyclic compound binding;GO:0005198//structural molecule activity;GO:0005488//binding	GO:0071704//organic substance metabolic process;GO:0043170//macromolecule metabolic process;GO:0008152//metabolic process;GO:0010467//gene expression
ENSGALG00000015540	RD23B	PREDICTED: UV excision repair protein RAD23 homolog B isoform X4 [Gallus gallus]	Genetic Information Processing	Replication and repair;Folding, sorting and degradation	ko04141//Protein processing in endoplasmic reticulum;ko03420//Nucleotide excision repair	K10839	GO:0032991//macromolecular complex;GO:0044422//organelle part;GO:0044464//cell part;GO:1990391//DNA repair complex;GO:0043227//membrane-bounded organelle;GO:0005634//nucleus;GO:0005623//cell;GO:0005622//intracellular;GO:0044424//intracellular part;GO:0043231//intracellular membrane-bounded organelle;GO:0043229//intracellular organelle;GO:0044446//intracellular organelle part;GO:0043234//protein c…	GO:0003676//nucleic acid binding;GO:0005515//protein binding;GO:0043130//ubiquitin binding;GO:0003677//DNA binding;GO:0032182//ubiquitin-like protein binding;GO:0005488//binding;GO:1901363//heterocyclic compound binding;GO:0097159//organic cyclic compound binding	GO:0048232//male gamete generation;GO:0019222//regulation of metabolic process;GO:0044265//cellular macromolecule catabolic process;GO:0006508//proteolysis;GO:0051603//proteolysis involved in cellular protein catabolic process;GO:0044702//single organism reproductive process;GO:1903362//regulation of cellular protein catabolic process;GO:0009057//macromolecule catabolic process;GO:0000003//reprod…
ENSGALG00000015108	FRDA	PREDICTED: frataxin, mitochondrial [Gallus gallus]	Metabolism	Metabolism of cofactors and vitamins	ko00860//Porphyrin and chlorophyll metabolism	K19054	-	-	-
ENSGALG00000033510	ERBB3	receptor tyrosine-protein kinase erbB-3 precursor [Gallus gallus]	Environmental Information Processing;Cellular Processes	Transport and catabolism;Signal transduction	ko04144//Endocytosis;ko04020//Calcium signaling pathway;ko04012//ErbB signaling pathway	K05084	GO:0016020//membrane;GO:0044459//plasma membrane part;GO:0044464//cell part;GO:0005623//cell;GO:0071944//cell periphery;GO:0043234//protein complex;GO:0032991//macromolecular complex;GO:0044425//membrane part;GO:0005886//plasma membrane	GO:0036094//small molecule binding;GO:0038023//signaling receptor activity;GO:0016301//kinase activity;GO:0097159//organic cyclic compound binding;GO:0004713//protein tyrosine kinase activity;GO:0004871//signal transducer activity;GO:0005488//binding;GO:0004872//receptor activity;GO:0005515//protein binding;GO:0003824//catalytic activity;GO:0016772//transferase activity, transferring phosphorus-c…	GO:0006468//protein phosphorylation;GO:0071704//organic substance metabolic process;GO:0023052//signaling;GO:0007167//enzyme linked receptor protein signaling pathway;GO:0048523//negative regulation of cellular process;GO:0048856//anatomical structure development;GO:0044238//primary metabolic process;GO:0044260//cellular macromolecule metabolic process;GO:0050794//regulation of cellular process;G…
ENSGALG00000041541	--	hypothetical protein N323_10397, partial [Cathartes aura]	-	-	-	-	-	-	-
ENSGALG00000008010	PTN1	tyrosine-protein phosphatase non-receptor type 1 [Gallus gallus]	Organismal Systems;Cellular Processes;Human Diseases	Cellular commiunity;Endocrine and metabolic diseases;Endocrine system	ko04910//Insulin signaling pathway;ko04520//Adherens junction;ko04931//Insulin resistance	K05696	GO:0043226//organelle;GO:0043229//intracellular organelle;GO:0042175//nuclear outer membrane-endoplasmic reticulum membrane network;GO:0005768//endosome;GO:0016020//membrane;GO:0044444//cytoplasmic part;GO:0043231//intracellular membrane-bounded organelle;GO:0043227//membrane-bounded organelle;GO:0012505//endomembrane system;GO:0044464//cell part;GO:0044424//intracellular part;GO:0005623//cell;GO…	GO:0046914//transition metal ion binding;GO:0005515//protein binding;GO:0019899//enzyme binding;GO:0004721//phosphoprotein phosphatase activity;GO:0005488//binding;GO:0043169//cation binding;GO:0016788//hydrolase activity, acting on ester bonds;GO:0046872//metal ion binding;GO:0043167//ion binding;GO:0016791//phosphatase activity;GO:0005102//receptor binding;GO:0042578//phosphoric ester hydrolase…	GO:0006810//transport;GO:0006996//organelle organization;GO:0044237//cellular metabolic process;GO:0050789//regulation of biological process;GO:0043170//macromolecule metabolic process;GO:0030036//actin cytoskeleton organization;GO:0048008//platelet-derived growth factor receptor signaling pathway;GO:0009987//cellular process;GO:0009966//regulation of signal transduction;GO:0050794//regulation of…
ENSGALG00000035993	SUOX	PREDICTED: sulfite oxidase, mitochondrial [Haliaeetus leucocephalus]	Metabolism	Global and Overview;Energy metabolism	ko01100//Metabolic pathways;ko01120//Microbial metabolism in diverse environments;ko00920//Sulfur metabolism	K00387	-	GO:0005488//binding;GO:0050662//coenzyme binding;GO:0046914//transition metal ion binding;GO:0048037//cofactor binding;GO:0043167//ion binding;GO:0046872//metal ion binding;GO:1901363//heterocyclic compound binding;GO:0003824//catalytic activity;GO:0097159//organic cyclic compound binding;GO:0043169//cation binding;GO:0046906//tetrapyrrole binding	GO:0008152//metabolic process;GO:0044699//single-organism process;GO:0044710//single-organism metabolic process
ENSGALG00000016854	DNLI4	DNA ligase IV [Gallus gallus]	Genetic Information Processing	Replication and repair	ko03450//Non-homologous end-joining	K10777	-	-	-
ENSGALG00000026203	F174A	PREDICTED: membrane protein FAM174A isoformX2 [Gallus gallus]	-	-	-	-	-	-	-
ENSGALG00000046129	PHF7	PREDICTED: PHD finger protein 7-like isoform X2 [Gallus gallus]	-	-	-	-	-	-	-
ENSGALG00000045670	PHF7	PREDICTED: PHD finger protein 7-like isoform X2 [Gallus gallus]	-	-	-	-	-	-	-
ENSGALG00000032916	THADA	PREDICTED: thyroid adenoma-associated protein homolog isoform X3 [Gallus gallus]	-	-	-	-	-	-	-
ENSGALG00000015164	PCSK5	PREDICTED: proprotein convertase subtilisin/kexin type 5-like [Gallus gallus]	-	-	-	-	-	-	-
ENSGALG00000005951	VPS29	vacuolar protein sorting 29 homolog [Gallus gallus]	Cellular Processes	Transport and catabolism	ko04144//Endocytosis	K18467	-	-	-
ENSGALG00000009748	ASNS	asparagine synthetase [glutamine-hydrolyzing] [Gallus gallus]	Metabolism	Amino acid metabolism;Global and Overview	ko01100//Metabolic pathways;ko01110//Biosynthesis of secondary metabolites;ko00250//Alanine, aspartate and glutamate metabolism	K01953	-	GO:0001883//purine nucleoside binding;GO:0097159//organic cyclic compound binding;GO:0032549//ribonucleoside binding;GO:0003824//catalytic activity;GO:0016879//ligase activity, forming carbon-nitrogen bonds;GO:0005488//binding;GO:0036094//small molecule binding;GO:0097367//carbohydrate derivative binding;GO:0016874//ligase activity;GO:0001882//nucleoside binding;GO:1901363//heterocyclic compound …	GO:0044271//cellular nitrogen compound biosynthetic process;GO:0009058//biosynthetic process;GO:0019752//carboxylic acid metabolic process;GO:0044711//single-organism biosynthetic process;GO:0044763//single-organism cellular process;GO:0000278//mitotic cell cycle;GO:0008652//cellular amino acid biosynthetic process;GO:0006915//apoptotic process;GO:1901564//organonitrogen compound metabolic proces…
ENSGALG00000005759	IFNB	interferon type B precursor [Gallus gallus]	Human Diseases;Organismal Systems;Environmental Information Processing	Signal transduction;Signaling molecules and interaction;Infectious diseases;Immune system	ko04060//Cytokine-cytokine receptor interaction;ko05168//Herpes simplex infection;ko05164//Influenza A;ko04630//Jak-STAT signaling pathway;ko04620//Toll-like receptor signaling pathway;ko04622//RIG-I-like receptor signaling pathway;ko04623//Cytosolic DNA-sensing pathway	K05415	-	-	-
ENSGALG00000030506	T2R40	PREDICTED: taste receptor type 2 member 40-like [Gallus gallus]	-	-	-	-	GO:0044425//membrane part;GO:0031224//intrinsic component of membrane;GO:0016020//membrane	GO:0038023//signaling receptor activity;GO:0060089//molecular transducer activity;GO:0099600//transmembrane receptor activity;GO:0004872//receptor activity;GO:0004871//signal transducer activity;GO:0004888//transmembrane signaling receptor activity	GO:0050896//response to stimulus;GO:0065007//biological regulation;GO:0050789//regulation of biological process;GO:0044763//single-organism cellular process;GO:0050877//neurological system process;GO:0009987//cellular process;GO:0044699//single-organism process;GO:0032501//multicellular organismal process;GO:0007166//cell surface receptor signaling pathway;GO:0007606//sensory perception of chemic…
ENSGALG00000030399	--	-	-	-	-	-	-	-	-
ENSGALG00000005340	S35A3	UDP-N-acetylglucosamine transporter [Gallus gallus]	-	-	-	-	GO:0016020//membrane;GO:0044425//membrane part;GO:0031224//intrinsic component of membrane	GO:0015293//symporter activity;GO:0051119//sugar transmembrane transporter activity;GO:1901476//carbohydrate transporter activity;GO:0022804//active transmembrane transporter activity;GO:0015215//nucleotide transmembrane transporter activity;GO:0008324//cation transmembrane transporter activity;GO:0015605//organophosphate ester transmembrane transporter activity;GO:0022857//transmembrane transpor…	GO:0051179//localization;GO:0006862//nucleotide transport;GO:0015931//nucleobase-containing compound transport;GO:0051234//establishment of localization;GO:0044765//single-organism transport;GO:0015748//organophosphate ester transport;GO:0006818//hydrogen transport;GO:0071702//organic substance transport;GO:0071705//nitrogen compound transport;GO:1902578//single-organism localization;GO:0006810//…
ENSGALG00000027984	EXTL2	PREDICTED: exostoses (multiple)-like 2 isoform X1 [Gallus gallus]	Metabolism	Global and Overview;Glycan biosynthesis and metabolism	ko01100//Metabolic pathways;ko00534//Glycosaminoglycan biosynthesis - heparan sulfate / heparin	K02369	GO:0016020//membrane;GO:0044422//organelle part;GO:0044425//membrane part;GO:0043229//intracellular organelle;GO:0043227//membrane-bounded organelle;GO:0043226//organelle;GO:0005783//endoplasmic reticulum;GO:0044446//intracellular organelle part;GO:0031090//organelle membrane;GO:0044432//endoplasmic reticulum part;GO:0044464//cell part;GO:0042175//nuclear outer membrane-endoplasmic reticulum memb…	GO:0008194//UDP-glycosyltransferase activity;GO:0008375//acetylglucosaminyltransferase activity;GO:0016740//transferase activity;GO:0016757//transferase activity, transferring glycosyl groups;GO:0016758//transferase activity, transferring hexosyl groups;GO:0008376//acetylgalactosaminyltransferase activity;GO:0003824//catalytic activity	GO:1901135//carbohydrate derivative metabolic process;GO:0071704//organic substance metabolic process;GO:0008152//metabolic process;GO:0006040//amino sugar metabolic process
ENSGALG00000015078	AF9	PREDICTED: protein AF-9 isoform X4 [Gallus gallus]	-	-	-	-	GO:0043231//intracellular membrane-bounded organelle;GO:0044424//intracellular part;GO:0043227//membrane-bounded organelle;GO:0044464//cell part;GO:0005622//intracellular;GO:0005623//cell;GO:0043226//organelle;GO:0043229//intracellular organelle	-	GO:0023057//negative regulation of signaling;GO:0009968//negative regulation of signal transduction;GO:0034641//cellular nitrogen compound metabolic process;GO:0007389//pattern specification process;GO:0003002//regionalization;GO:0048518//positive regulation of biological process;GO:0050794//regulation of cellular process;GO:0043170//macromolecule metabolic process;GO:0044767//single-organism dev…
ENSGALG00000028501	DCK	deoxycytidine kinase [Gallus gallus]	Metabolism	Global and Overview;Nucleotide metabolism	ko01100//Metabolic pathways;ko00230//Purine metabolism;ko00240//Pyrimidine metabolism	K00893	-	GO:0001883//purine nucleoside binding;GO:0016772//transferase activity, transferring phosphorus-containing groups;GO:0016740//transferase activity;GO:0005515//protein binding;GO:0019205//nucleobase-containing compound kinase activity;GO:0003824//catalytic activity;GO:0001882//nucleoside binding;GO:0097367//carbohydrate derivative binding;GO:0019206//nucleoside kinase activity;GO:0032549//ribonucl…	GO:0006725//cellular aromatic compound metabolic process;GO:0008152//metabolic process;GO:0044763//single-organism cellular process;GO:1901360//organic cyclic compound metabolic process;GO:0009987//cellular process;GO:0006139//nucleobase-containing compound metabolic process;GO:0006753//nucleoside phosphate metabolic process;GO:0071704//organic substance metabolic process;GO:0044281//small molecu…
ENSGALG00000037656	NECP1	PREDICTED: adaptin ear-binding coat-associated protein 1 [Gallus gallus]	-	-	-	-	GO:0030117//membrane coat;GO:0030118//clathrin coat;GO:0044464//cell part;GO:0043234//protein complex;GO:0032991//macromolecular complex;GO:0044424//intracellular part;GO:0005622//intracellular;GO:0005737//cytoplasm;GO:0048475//coated membrane;GO:0012505//endomembrane system;GO:0016020//membrane;GO:0044425//membrane part;GO:0044444//cytoplasmic part;GO:0005623//cell;GO:0098796//membrane protein c…	-	GO:0016192//vesicle-mediated transport;GO:0051234//establishment of localization;GO:0051179//localization;GO:0006810//transport
ENSGALG00000014859	ZN131	PREDICTED: zinc finger protein 131 isoform X1 [Gallus gallus]	-	-	-	-	-	-	-
ENSGALG00000034395	NUDT7	peroxisomal coenzyme A diphosphatase NUDT7 [Gallus gallus]	Cellular Processes	Transport and catabolism	ko04146//Peroxisome	K17879	GO:0042579//microbody;GO:0005622//intracellular;GO:0044444//cytoplasmic part;GO:0043231//intracellular membrane-bounded organelle;GO:0005623//cell;GO:0043226//organelle;GO:0043227//membrane-bounded organelle;GO:0005737//cytoplasm;GO:0044424//intracellular part;GO:0044464//cell part;GO:0043229//intracellular organelle	GO:0097159//organic cyclic compound binding;GO:0046872//metal ion binding;GO:0003676//nucleic acid binding;GO:0005488//binding;GO:1901363//heterocyclic compound binding;GO:0016289//CoA hydrolase activity;GO:0003824//catalytic activity;GO:0003723//RNA binding;GO:0016788//hydrolase activity, acting on ester bonds;GO:0016817//hydrolase activity, acting on acid anhydrides;GO:0043167//ion binding;GO:0…	GO:0044237//cellular metabolic process;GO:0044699//single-organism process;GO:0055086//nucleobase-containing small molecule metabolic process;GO:0051187//cofactor catabolic process;GO:0030154//cell differentiation;GO:0044281//small molecule metabolic process;GO:0006732//coenzyme metabolic process;GO:0019637//organophosphate metabolic process;GO:0044248//cellular catabolic process;GO:0044763//sing…
ENSGALG00000005248	CC14A	dual specificity protein phosphatase CDC14A [Gallus gallus]	Cellular Processes	Cell growth and death	ko04110//Cell cycle	K06639	GO:0044446//intracellular organelle part;GO:0005623//cell;GO:0044464//cell part;GO:0043229//intracellular organelle;GO:0043227//membrane-bounded organelle;GO:0005856//cytoskeleton;GO:0044422//organelle part;GO:0043231//intracellular membrane-bounded organelle;GO:0043228//non-membrane-bounded organelle;GO:0005815//microtubule organizing center;GO:0044430//cytoskeletal part;GO:0043226//organelle;GO…	GO:0016787//hydrolase activity;GO:0004721//phosphoprotein phosphatase activity;GO:0016791//phosphatase activity;GO:0003824//catalytic activity;GO:0016788//hydrolase activity, acting on ester bonds;GO:0042578//phosphoric ester hydrolase activity	-
ENSGALG00000038950	MUC2	PREDICTED: mucin-2 [Gallus gallus]	-	-	-	-	-	-	-
ENSGALG00000014331	FKBP4	peptidyl-prolyl cis-trans isomerase FKBP4 [Gallus gallus]	-	-	-	-	GO:0005623//cell;GO:0044464//cell part;GO:0005622//intracellular;GO:0044424//intracellular part;GO:0043229//intracellular organelle;GO:0043231//intracellular membrane-bounded organelle;GO:0043226//organelle;GO:0043227//membrane-bounded organelle	GO:0036094//small molecule binding;GO:0032550//purine ribonucleoside binding;GO:0005488//binding;GO:0035257//nuclear hormone receptor binding;GO:0097367//carbohydrate derivative binding;GO:0005102//receptor binding;GO:0001883//purine nucleoside binding;GO:0051427//hormone receptor binding;GO:0097159//organic cyclic compound binding;GO:0035258//steroid hormone receptor binding;GO:0005515//protein …	GO:0051179//localization;GO:0009987//cellular process;GO:0010033//response to organic substance;GO:0071495//cellular response to endogenous stimulus;GO:0032870//cellular response to hormone stimulus;GO:0044699//single-organism process;GO:0044767//single-organism developmental process;GO:0007165//signal transduction;GO:0033036//macromolecule localization;GO:0048731//system development;GO:0043401//…
ENSGALG00000015071	FOCAD	PREDICTED: focadhesin [Charadrius vociferus]	-	-	-	-	-	-	-
ENSGALG00000006771	RS15A	PREDICTED: 40S ribosomal protein S15a isoform X2 [Gallus gallus]	Genetic Information Processing	Translation	ko03010//Ribosome	K02957	GO:0043228//non-membrane-bounded organelle;GO:1990904//ribonucleoprotein complex;GO:0005840//ribosome;GO:0043231//intracellular membrane-bounded organelle;GO:0043227//membrane-bounded organelle;GO:0032991//macromolecular complex;GO:0044422//organelle part;GO:0031988//membrane-bounded vesicle;GO:0044391//ribosomal subunit;GO:0044446//intracellular organelle part;GO:0005623//cell;GO:0031982//vesicl…	GO:0097159//organic cyclic compound binding;GO:0005488//binding;GO:0003723//RNA binding;GO:0005198//structural molecule activity;GO:0003676//nucleic acid binding;GO:1901363//heterocyclic compound binding	GO:0050896//response to stimulus;GO:0071704//organic substance metabolic process;GO:0010467//gene expression;GO:0050794//regulation of cellular process;GO:0043207//response to external biotic stimulus;GO:0051707//response to other organism;GO:0008152//metabolic process;GO:0051704//multi-organism process;GO:0009605//response to external stimulus;GO:0051726//regulation of cell cycle;GO:0009607//res…
ENSGALG00000005598	ZN598	PREDICTED: zinc finger protein 598 isoformX3 [Gallus gallus]	-	-	-	-	-	-	-
ENSGALG00000045096	NPW	PREDICTED: neuropeptide W [Pseudopodoces humilis]	-	-	-	-	-	GO:0005102//receptor binding;GO:0005515//protein binding;GO:0005488//binding	GO:0007186//G-protein coupled receptor signaling pathway;GO:0007610//behavior;GO:0009987//cellular process;GO:0007165//signal transduction;GO:0065007//biological regulation;GO:0051716//cellular response to stimulus;GO:0050794//regulation of cellular process;GO:0044763//single-organism cellular process;GO:0044699//single-organism process;GO:0044700//single organism signaling;GO:0050789//regulation…
ENSGALG00000010050	LRFN2	PREDICTED: leucine-rich repeat and fibronectin type-III domain-containing protein 2 isoform X3 [Gallus gallus]	-	-	-	-	-	-	-
ENSGALG00000005937	LV1	immunoglobulin lambda chain, partial [Gallus gallus]	-	-	-	-	-	-	-
ENSGALG00000020884	PGFS	PREDICTED: LOW QUALITY PROTEIN: uncharacterized oxidoreductase ZK1290.5-like [Gallus gallus]	-	-	-	-	-	-	-
ENSGALG00000045739	--	-	-	-	-	-	-	-	-
ENSGALG00000009737	TKN1	PREDICTED: protachykinin-1 isoform X4 [Gallus gallus]	Environmental Information Processing	Signaling molecules and interaction	ko04080//Neuroactive ligand-receptor interaction	K05239	GO:0042995//cell projection;GO:0044464//cell part;GO:0097458//neuron part;GO:0005623//cell;GO:0043005//neuron projection;GO:0044297//cell body	-	GO:0006873//cellular ion homeostasis;GO:0019725//cellular homeostasis;GO:0033555//multicellular organismal response to stress;GO:0007600//sensory perception;GO:0007154//cell communication;GO:0065008//regulation of biological quality;GO:0044763//single-organism cellular process;GO:0065007//biological regulation;GO:0050877//neurological system process;GO:0006952//defense response;GO:0072507//divale…
ENSGALG00000002250	DTWD2	DTW domain-containing protein 2 [Gallus gallus]	-	-	-	-	-	-	-
ENSGALG00000035734	IKZF4	PREDICTED: zinc finger protein Eos isoform X2 [Aquila chrysaetos canadensis]	-	-	-	-	-	GO:0097159//organic cyclic compound binding;GO:0043167//ion binding;GO:0005488//binding;GO:0043169//cation binding	-
ENSGALG00000015598	RGRF2	PREDICTED: ras-specific guanine nucleotide-releasing factor 2 isoform X1 [Gallus gallus]	Environmental Information Processing	Signal transduction	ko04010//MAPK signaling pathway	K12326	GO:0044424//intracellular part;GO:0005623//cell;GO:0005622//intracellular;GO:0044464//cell part	GO:0098772//molecular function regulator;GO:0005088//Ras guanyl-nucleotide exchange factor activity;GO:0005085//guanyl-nucleotide exchange factor activity	GO:0044763//single-organism cellular process;GO:0050896//response to stimulus;GO:0044700//single organism signaling;GO:0050794//regulation of cellular process;GO:0044699//single-organism process;GO:0007154//cell communication;GO:0050789//regulation of biological process;GO:0065007//biological regulation;GO:0023052//signaling;GO:0009987//cellular process;GO:0007165//signal transduction;GO:0051716/…
ENSGALG00000046169	WIBG	PREDICTED: partner of Y14 and mago-like [Gallus gallus]	Genetic Information Processing	Translation	ko03013//RNA transport;ko03015//mRNA surveillance pathway	K14294	GO:0043231//intracellular membrane-bounded organelle;GO:0043226//organelle;GO:0043227//membrane-bounded organelle;GO:0005622//intracellular;GO:0043229//intracellular organelle;GO:0032991//macromolecular complex;GO:0005623//cell;GO:0043234//protein complex;GO:0044464//cell part;GO:0044424//intracellular part	GO:0003676//nucleic acid binding;GO:0044877//macromolecular complex binding;GO:0003723//RNA binding;GO:0005488//binding;GO:0097159//organic cyclic compound binding;GO:1901363//heterocyclic compound binding;GO:0043021//ribonucleoprotein complex binding	GO:0019538//protein metabolic process;GO:0034655//nucleobase-containing compound catabolic process;GO:0034645//cellular macromolecule biosynthetic process;GO:0044267//cellular protein metabolic process;GO:0016071//mRNA metabolic process;GO:0006725//cellular aromatic compound metabolic process;GO:0044238//primary metabolic process;GO:0009057//macromolecule catabolic process;GO:0009056//catabolic p…
ENSGALG00000029660	MYH4	PREDICTED: myosin-13 [Gallus gallus]	Cellular Processes	Cellular commiunity	ko04530//Tight junction	K10352	-	-	-
ENSGALG00000014872	FGF10	fibroblast growth factor 10 precursor [Gallus gallus]	Cellular Processes;Environmental Information Processing	Signal transduction;Cell motility	ko04010//MAPK signaling pathway;ko04810//Regulation of actin cytoskeleton	K04358	GO:0005576//extracellular region;GO:0005622//intracellular;GO:0043226//organelle;GO:0043227//membrane-bounded organelle;GO:0016020//membrane;GO:0044424//intracellular part;GO:0044464//cell part;GO:0043229//intracellular organelle;GO:0044421//extracellular region part;GO:0043231//intracellular membrane-bounded organelle;GO:0005623//cell	GO:0005488//binding;GO:0005104//fibroblast growth factor receptor binding;GO:0005515//protein binding;GO:0070851//growth factor receptor binding;GO:0005102//receptor binding;GO:0097367//carbohydrate derivative binding;GO:0005539//glycosaminoglycan binding	GO:1901099//negative regulation of signal transduction in absence of ligand;GO:0008544//epidermis development;GO:0048520//positive regulation of behavior;GO:0048771//tissue remodeling;GO:0007010//cytoskeleton organization;GO:0035295//tube development;GO:0002520//immune system development;GO:0001944//vasculature development;GO:0060495//cell-cell signaling involved in lung development;GO:0048562//e…
ENSGALG00000039973	--	hypothetical protein DAPPUDRAFT_105663 [Daphnia pulex]	-	-	-	-	-	-	-
ENSGALG00000044073	CLD8	PREDICTED: claudin-8 [Gallus gallus]	Environmental Information Processing;Cellular Processes	Signaling molecules and interaction;Cellular commiunity	ko04530//Tight junction;ko04514//Cell adhesion molecules (CAMs)	K06087	GO:0005911//cell-cell junction;GO:0031224//intrinsic component of membrane;GO:0044425//membrane part;GO:0043296//apical junction complex;GO:0030054//cell junction;GO:0016020//membrane	-	-
ENSGALG00000015682	CEGT	PREDICTED: ceramide glucosyltransferase [Gallus gallus]	Metabolism	Lipid metabolism;Global and Overview	ko01100//Metabolic pathways;ko00600//Sphingolipid metabolism	K00720	-	GO:0016740//transferase activity;GO:0003824//catalytic activity	-
ENSGALG00000012594	NTRK2	BDNF/NT-3 growth factors receptor precursor [Gallus gallus]	Environmental Information Processing	Signal transduction	ko04010//MAPK signaling pathway	K04360	GO:0016020//membrane;GO:0044424//intracellular part;GO:0098589//membrane region;GO:0016021//integral component of membrane;GO:0005886//plasma membrane;GO:0033267//axon part;GO:0042995//cell projection;GO:0031224//intrinsic component of membrane;GO:0044444//cytoplasmic part;GO:0097060//synaptic membrane;GO:0044425//membrane part;GO:0044446//intracellular organelle part;GO:0043226//organelle;GO:009…	GO:0016740//transferase activity;GO:0004714//transmembrane receptor protein tyrosine kinase activity;GO:0016773//phosphotransferase activity, alcohol group as acceptor;GO:1901363//heterocyclic compound binding;GO:0004672//protein kinase activity;GO:0005488//binding;GO:0046983//protein dimerization activity;GO:0004871//signal transducer activity;GO:0097159//organic cyclic compound binding;GO:00973…	GO:0050794//regulation of cellular process;GO:0010941//regulation of cell death;GO:0048858//cell projection morphogenesis;GO:0007610//behavior;GO:0009887//organ morphogenesis;GO:0050790//regulation of catalytic activity;GO:0006928//movement of cell or subcellular component;GO:0046942//carboxylic acid transport;GO:0007169//transmembrane receptor protein tyrosine kinase signaling pathway;GO:0030900…
ENSGALG00000008014	CEBPB	CCAAT/enhancer-binding protein beta [Gallus gallus]	-	-	-	-	GO:0000785//chromatin;GO:0044446//intracellular organelle part;GO:0044427//chromosomal part;GO:0005622//intracellular;GO:0044424//intracellular part;GO:0005694//chromosome;GO:0043226//organelle;GO:0043231//intracellular membrane-bounded organelle;GO:0044464//cell part;GO:0005623//cell;GO:0044422//organelle part;GO:0043229//intracellular organelle;GO:0043228//non-membrane-bounded organelle;GO:0032…	GO:0003677//DNA binding;GO:0003700//transcription factor activity, sequence-specific DNA binding;GO:0001071//nucleic acid binding transcription factor activity;GO:0005488//binding;GO:0046983//protein dimerization activity;GO:0005515//protein binding;GO:0003676//nucleic acid binding;GO:0000981//RNA polymerase II transcription factor activity, sequence-specific DNA binding;GO:0000982//transcription…	GO:0009607//response to biotic stimulus;GO:0042221//response to chemical;GO:0051716//cellular response to stimulus;GO:0009719//response to endogenous stimulus;GO:1901698//response to nitrogen compound;GO:0010941//regulation of cell death;GO:0019438//aromatic compound biosynthetic process;GO:0009059//macromolecule biosynthetic process;GO:0051707//response to other organism;GO:0001503//ossification…
ENSGALG00000011642	ANR17	PREDICTED: ankyrin repeat domain-containing protein 17 isoform X8 [Gallus gallus]	-	-	-	-	GO:0005622//intracellular;GO:0043231//intracellular membrane-bounded organelle;GO:0005623//cell;GO:0043227//membrane-bounded organelle;GO:0044464//cell part;GO:0043226//organelle;GO:0044424//intracellular part;GO:0043229//intracellular organelle	GO:0097159//organic cyclic compound binding;GO:0003676//nucleic acid binding;GO:1901363//heterocyclic compound binding;GO:0005488//binding	GO:0044699//single-organism process;GO:0032502//developmental process;GO:0061061//muscle structure development;GO:0044763//single-organism cellular process;GO:0051145//smooth muscle cell differentiation;GO:0044767//single-organism developmental process;GO:0030154//cell differentiation;GO:0048856//anatomical structure development;GO:0048869//cellular developmental process;GO:0009987//cellular proc…
ENSGALG00000028305	IFNA1	interferon type A1/A2 precursor [Gallus gallus]	Human Diseases;Cellular Processes;Environmental Information Processing;Organismal Systems	Transport and catabolism;Immune system;Infectious diseases;Signaling molecules and interaction;Signal transduction	ko04060//Cytokine-cytokine receptor interaction;ko05168//Herpes simplex infection;ko05164//Influenza A;ko04630//Jak-STAT signaling pathway;ko04620//Toll-like receptor signaling pathway;ko04622//RIG-I-like receptor signaling pathway;ko04623//Cytosolic DNA-sensing pathway;ko04140//Regulation of autophagy	K05414	-	-	-
ENSGALG00000026994	F155A	PREDICTED: transmembrane protein FAM155A [Gallus gallus]	-	-	-	-	-	-	-
ENSGALG00000034721	LV1	immunoglobulin lambda light chain, partial [Gallus gallus]	-	-	-	-	-	-	-
ENSGALG00000005277	RTCA	PREDICTED: RNA 3'-terminal phosphate cyclase [Gallus gallus]	-	-	-	-	-	GO:0009975//cyclase activity;GO:0097159//organic cyclic compound binding;GO:0001883//purine nucleoside binding;GO:0097367//carbohydrate derivative binding;GO:0032549//ribonucleoside binding;GO:0032550//purine ribonucleoside binding;GO:0005488//binding;GO:0003824//catalytic activity;GO:0001882//nucleoside binding;GO:1901363//heterocyclic compound binding;GO:0036094//small molecule binding	GO:0008152//metabolic process;GO:0043170//macromolecule metabolic process;GO:0071704//organic substance metabolic process;GO:0010467//gene expression
ENSGALG00000028142	HACD4	PREDICTED: very-long-chain (3R)-3-hydroxyacyl-[acyl-carrier protein] dehydratase 4 [Gallus gallus]	Metabolism	Lipid metabolism;Global and Overview	ko01110//Biosynthesis of secondary metabolites;ko01212//Fatty acid metabolism;ko01040//Biosynthesis of unsaturated fatty acids;ko00062//Fatty acid elongation	K10703	-	-	-
ENSGALG00000039970	ENDOU	PREDICTED: poly(U)-specific endoribonuclease [Gallus gallus]	-	-	-	-	-	GO:0060089//molecular transducer activity;GO:0016787//hydrolase activity;GO:0001871//pattern binding;GO:0005488//binding;GO:0003824//catalytic activity;GO:0038024//cargo receptor activity;GO:0004872//receptor activity	GO:0051179//localization;GO:0051234//establishment of localization;GO:0006897//endocytosis;GO:0002376//immune system process;GO:0016192//vesicle-mediated transport;GO:0006810//transport
ENSGALG00000014865	CE034	similar to 4833420G17Rik protein, isoform CRA_c [Rattus norvegicus]	-	-	-	-	-	-	-
ENSGALG00000044668	FBX21	PREDICTED: F-box only protein 21-like isoform X1 [Anas platyrhynchos]	-	-	-	-	-	GO:0005488//binding;GO:0003676//nucleic acid binding;GO:0097159//organic cyclic compound binding;GO:1901363//heterocyclic compound binding	-
ENSGALG00000043984	UVS2	PREDICTED: embryonic protein UVS.2-like [Gallus gallus]	-	-	-	-	-	GO:0046872//metal ion binding;GO:0004175//endopeptidase activity;GO:0005488//binding;GO:0043169//cation binding;GO:0016787//hydrolase activity;GO:0043167//ion binding;GO:0003824//catalytic activity;GO:0046914//transition metal ion binding;GO:0008233//peptidase activity;GO:0070011//peptidase activity, acting on L-amino acid peptides	GO:0019538//protein metabolic process;GO:0051604//protein maturation;GO:0071704//organic substance metabolic process;GO:0006508//proteolysis;GO:0008152//metabolic process;GO:0016485//protein processing;GO:0010467//gene expression;GO:0043170//macromolecule metabolic process;GO:0044238//primary metabolic process
ENSGALG00000014736	KELL	PREDICTED: kell blood group glycoprotein homolog isoform X2 [Gallus gallus]	-	-	-	-	-	GO:0003824//catalytic activity;GO:0016787//hydrolase activity;GO:0070011//peptidase activity, acting on L-amino acid peptides;GO:0008233//peptidase activity;GO:0004175//endopeptidase activity	GO:0006508//proteolysis;GO:0071704//organic substance metabolic process;GO:0010467//gene expression;GO:0051604//protein maturation;GO:0044238//primary metabolic process;GO:0043170//macromolecule metabolic process;GO:0019538//protein metabolic process;GO:0016485//protein processing;GO:0008152//metabolic process
ENSGALG00000014746	TRPV6	PREDICTED: transient receptor potential cation channel subfamily V member 6 isoform X3 [Gallus gallus]	-	-	-	-	GO:0031224//intrinsic component of membrane;GO:0016020//membrane;GO:0044425//membrane part	GO:0022857//transmembrane transporter activity;GO:0022891//substrate-specific transmembrane transporter activity;GO:0022838//substrate-specific channel activity;GO:0005261//cation channel activity;GO:0015267//channel activity;GO:0005215//transporter activity;GO:0008324//cation transmembrane transporter activity;GO:0005216//ion channel activity;GO:0022892//substrate-specific transporter activity;G…	-
ENSGALG00000021136	VPRE3	PREDICTED: pre-B lymphocyte protein 3 [Gallus gallus]	-	-	-	-	-	-	-
ENSGALG00000005302	SAS6	spindle assembly abnormal protein 6 homolog [Gallus gallus]	-	-	-	-	GO:0015630//microtubule cytoskeleton;GO:0044464//cell part;GO:0044424//intracellular part;GO:0043232//intracellular non-membrane-bounded organelle;GO:0005815//microtubule organizing center;GO:0043226//organelle;GO:0044430//cytoskeletal part;GO:0005856//cytoskeleton;GO:0005813//centrosome;GO:0044422//organelle part;GO:0005623//cell;GO:0005622//intracellular;GO:0043229//intracellular organelle;GO:0…	-	GO:0044763//single-organism cellular process;GO:0009987//cellular process;GO:0007049//cell cycle;GO:0022402//cell cycle process;GO:0044699//single-organism process
ENSGALG00000036598	K1644	KIAA1644 [Homo sapiens]	-	-	-	-	-	-	-
ENSGALG00000010173	KCNV2	PREDICTED: potassium voltage-gated channel subfamily V member 2 [Gallus gallus]	-	-	-	-	-	-	-
ENSGALG00000011474	OSB10	PREDICTED: oxysterol-binding protein-related protein 10 isoform X1 [Gallus gallus]	-	-	-	-	-	GO:0043178//alcohol binding;GO:0005496//steroid binding;GO:0032934//sterol binding;GO:0097159//organic cyclic compound binding;GO:0008289//lipid binding;GO:0005488//binding;GO:0036094//small molecule binding	-
ENSGALG00000032052	RS26	PREDICTED: 40S ribosomal protein S26-like [Chlorocebus sabaeus]	Genetic Information Processing	Translation	ko03010//Ribosome	K02976	GO:0044391//ribosomal subunit;GO:0043226//organelle;GO:0015935//small ribosomal subunit;GO:0043232//intracellular non-membrane-bounded organelle;GO:0044464//cell part;GO:0032991//macromolecular complex;GO:0044422//organelle part;GO:0005840//ribosome;GO:0005737//cytoplasm;GO:0044424//intracellular part;GO:0005623//cell;GO:0043228//non-membrane-bounded organelle;GO:1990904//ribonucleoprotein comple…	GO:0003723//RNA binding;GO:0044822//poly(A) RNA binding;GO:0005488//binding;GO:0003676//nucleic acid binding;GO:0005198//structural molecule activity;GO:0097159//organic cyclic compound binding;GO:1901363//heterocyclic compound binding	GO:0090304//nucleic acid metabolic process;GO:0006725//cellular aromatic compound metabolic process;GO:0006396//RNA processing;GO:0006807//nitrogen compound metabolic process;GO:0008152//metabolic process;GO:0034641//cellular nitrogen compound metabolic process;GO:0044237//cellular metabolic process;GO:1901360//organic cyclic compound metabolic process;GO:0046483//heterocycle metabolic process;GO…
ENSGALG00000014861	NIM1	serine/threonine-protein kinase NIM1 [Gallus gallus]	-	-	-	-	-	GO:0004672//protein kinase activity;GO:0016740//transferase activity;GO:0032550//purine ribonucleoside binding;GO:0036094//small molecule binding;GO:0005488//binding;GO:0001883//purine nucleoside binding;GO:0043167//ion binding;GO:0016772//transferase activity, transferring phosphorus-containing groups;GO:0003824//catalytic activity;GO:0016773//phosphotransferase activity, alcohol group as accept…	GO:0044267//cellular protein metabolic process;GO:0043412//macromolecule modification;GO:0071704//organic substance metabolic process;GO:0006793//phosphorus metabolic process;GO:0043170//macromolecule metabolic process;GO:0044237//cellular metabolic process;GO:0006796//phosphate-containing compound metabolic process;GO:0036211//protein modification process;GO:0044260//cellular macromolecule metab…
ENSGALG00000031062	BAG5	PREDICTED: BAG family molecular chaperone regulator 5 [Meleagris gallopavo]	-	-	-	-	GO:0044464//cell part;GO:0044444//cytoplasmic part;GO:0044424//intracellular part;GO:0005622//intracellular;GO:0005737//cytoplasm;GO:0005623//cell	GO:0005488//binding;GO:0005515//protein binding	-
ENSGALG00000001668	UB2R2	ubiquitin-conjugating enzyme E2 R2 [Taeniopygia guttata]	Human Diseases;Genetic Information Processing	Folding, sorting and degradation;Infectious diseases	ko05168//Herpes simplex infection;ko04120//Ubiquitin mediated proteolysis	K02207	GO:0043227//membrane-bounded organelle;GO:0044424//intracellular part;GO:0043226//organelle;GO:0043231//intracellular membrane-bounded organelle;GO:0044464//cell part;GO:0043229//intracellular organelle;GO:0005622//intracellular;GO:0005623//cell	GO:0003824//catalytic activity;GO:0097159//organic cyclic compound binding;GO:0032550//purine ribonucleoside binding;GO:0036094//small molecule binding;GO:0001882//nucleoside binding;GO:0097367//carbohydrate derivative binding;GO:0016740//transferase activity;GO:0019787//ubiquitin-like protein transferase activity;GO:0005488//binding;GO:0001883//purine nucleoside binding;GO:0032549//ribonucleosid…	GO:0007154//cell communication;GO:0009056//catabolic process;GO:0043170//macromolecule metabolic process;GO:0044265//cellular macromolecule catabolic process;GO:0007165//signal transduction;GO:0044248//cellular catabolic process;GO:0009987//cellular process;GO:0044257//cellular protein catabolic process;GO:0019935//cyclic-nucleotide-mediated signaling;GO:0030163//protein catabolic process;GO:0036…
ENSGALG00000034899	NKAI3	PREDICTED: sodium/potassium-transporting ATPase subunit beta-1-interacting protein 3 isoform X5 [Gallus gallus]	-	-	-	-	-	-	-
ENSGALG00000046527	RHG32	PREDICTED: rho GTPase-activating protein 32-like, partial [Colius striatus]	-	-	-	-	GO:0044424//intracellular part;GO:0005737//cytoplasm;GO:0044464//cell part;GO:0043232//intracellular non-membrane-bounded organelle;GO:0043228//non-membrane-bounded organelle;GO:0043226//organelle;GO:0005623//cell;GO:0043229//intracellular organelle;GO:0044444//cytoplasmic part;GO:0005856//cytoskeleton;GO:0005622//intracellular	GO:0043167//ion binding;GO:0043168//anion binding;GO:0005543//phospholipid binding;GO:0008289//lipid binding;GO:0005488//binding	GO:0044699//single-organism process;GO:0044763//single-organism cellular process;GO:0007154//cell communication;GO:0009987//cellular process
ENSGALG00000014840	CO6	complement component C6 precursor [Gallus gallus]	-	-	-	-	GO:0044464//cell part;GO:0016020//membrane;GO:0044425//membrane part;GO:0005886//plasma membrane;GO:0071944//cell periphery;GO:0031224//intrinsic component of membrane;GO:0031226//intrinsic component of plasma membrane;GO:0005623//cell;GO:0005887//integral component of plasma membrane;GO:0016021//integral component of membrane;GO:0044459//plasma membrane part	-	GO:0080134//regulation of response to stress;GO:0044767//single-organism developmental process;GO:0032101//regulation of response to external stimulus;GO:0001905//activation of membrane attack complex;GO:0065007//biological regulation;GO:0048584//positive regulation of response to stimulus;GO:0072358//cardiovascular system development;GO:0048514//blood vessel morphogenesis;GO:0071704//organic sub…
ENSGALG00000037665	LMBRL	PREDICTED: protein LMBR1L [Aquila chrysaetos canadensis]	-	-	-	-	-	-	-
ENSGALG00000014867	PAIP1	poly(A) binding protein interacting protein 1 isoform 1 [Gallus gallus]	Genetic Information Processing	Translation	ko03013//RNA transport	K14322	-	GO:0005488//binding;GO:0097159//organic cyclic compound binding;GO:1901363//heterocyclic compound binding;GO:0090079//translation regulator activity, nucleic acid binding;GO:0003676//nucleic acid binding;GO:0045182//translation regulator activity	-
ENSGALG00000005252	GPR88	PREDICTED: probable G-protein coupled receptor 88, partial [Gallus gallus]	-	-	-	-	GO:0044425//membrane part;GO:0031224//intrinsic component of membrane;GO:0016020//membrane	-	GO:0044763//single-organism cellular process;GO:0007154//cell communication;GO:0007610//behavior;GO:0042391//regulation of membrane potential;GO:0001508//action potential;GO:0009987//cellular process;GO:0050905//neuromuscular process;GO:0050794//regulation of cellular process;GO:0050896//response to stimulus;GO:0065008//regulation of biological quality;GO:0050789//regulation of biological process…
ENSGALG00000022787	MRO2B	PREDICTED: maestro heat-like repeat-containing protein family member 2B-like [Gallus gallus]	-	-	-	-	-	-	-
ENSGALG00000034306	NDF4	neurogenic differentiation factor 4 [Gallus gallus]	-	-	-	-	GO:0044464//cell part;GO:0043231//intracellular membrane-bounded organelle;GO:0043226//organelle;GO:0005622//intracellular;GO:0005623//cell;GO:0043227//membrane-bounded organelle;GO:0044424//intracellular part;GO:0043229//intracellular organelle	GO:0005488//binding;GO:1901363//heterocyclic compound binding;GO:0097159//organic cyclic compound binding;GO:0003676//nucleic acid binding;GO:0005515//protein binding	GO:0051716//cellular response to stimulus;GO:0048869//cellular developmental process;GO:0007154//cell communication;GO:0007423//sensory organ development;GO:0006807//nitrogen compound metabolic process;GO:0009059//macromolecule biosynthetic process;GO:1901360//organic cyclic compound metabolic process;GO:0044707//single-multicellular organism process;GO:0032502//developmental process;GO:0008152//…
ENSGALG00000043775	RPGF3	PREDICTED: rap guanine nucleotide exchange factor 3 [Gallus gallus]	Organismal Systems	Circulatory system	ko04261//Adrenergic signaling in cardiomyocytes	K08014	GO:0005622//intracellular;GO:0044424//intracellular part;GO:0005623//cell;GO:0044464//cell part	GO:0019887//protein kinase regulator activity;GO:0005088//Ras guanyl-nucleotide exchange factor activity;GO:0098772//molecular function regulator;GO:0005085//guanyl-nucleotide exchange factor activity;GO:0030234//enzyme regulator activity;GO:0019207//kinase regulator activity	GO:0051336//regulation of hydrolase activity;GO:0001944//vasculature development;GO:0019222//regulation of metabolic process;GO:0044699//single-organism process;GO:0048468//cell development;GO:0065009//regulation of molecular function;GO:0046683//response to organophosphorus;GO:0050789//regulation of biological process;GO:0001885//endothelial cell development;GO:0033043//regulation of organelle o…
ENSGALG00000014234	ATX10	PREDICTED: ataxin-10 isoform X2 [Gallus gallus]	-	-	-	-	GO:0005623//cell;GO:0044464//cell part;GO:0044444//cytoplasmic part;GO:0005737//cytoplasm;GO:0044424//intracellular part;GO:0005622//intracellular;GO:0044297//cell body	-	GO:0009987//cellular process;GO:0044699//single-organism process;GO:0030030//cell projection organization;GO:0016043//cellular component organization;GO:0071840//cellular component organization or biogenesis;GO:0044763//single-organism cellular process
ENSGALG00000015683	GBG10	guanine nucleotide-binding protein G(I)/G(S)/G(O) subunit gamma-10 [Gallus gallus]	-	-	-	-	GO:0044464//cell part;GO:0016020//membrane;GO:0098562//cytoplasmic side of membrane;GO:0005622//intracellular;GO:0009898//cytoplasmic side of plasma membrane;GO:0005623//cell;GO:0005886//plasma membrane;GO:0031234//extrinsic component of cytoplasmic side of plasma membrane;GO:0044459//plasma membrane part;GO:0019898//extrinsic component of membrane;GO:0019897//extrinsic component of plasma membra…	GO:0016818//hydrolase activity, acting on acid anhydrides, in phosphorus-containing anhydrides;GO:0016787//hydrolase activity;GO:0017111//nucleoside-triphosphatase activity;GO:0003824//catalytic activity;GO:0060089//molecular transducer activity;GO:0016462//pyrophosphatase activity;GO:0016817//hydrolase activity, acting on acid anhydrides	GO:0009719//response to endogenous stimulus;GO:0015980//energy derivation by oxidation of organic compounds;GO:0009056//catabolic process;GO:0044763//single-organism cellular process;GO:0055114//oxidation-reduction process;GO:1901361//organic cyclic compound catabolic process;GO:0072523//purine-containing compound catabolic process;GO:0065007//biological regulation;GO:0007267//cell-cell signaling…
ENSGALG00000005147	AMYP	amylase, alpha 1A salivary precursor [Gallus gallus]	Metabolism	Carbohydrate metabolism;Global and Overview	ko01100//Metabolic pathways;ko00500//Starch and sucrose metabolism	K01176	-	GO:0043167//ion binding;GO:0005488//binding;GO:0003824//catalytic activity;GO:0016787//hydrolase activity	GO:0044238//primary metabolic process;GO:0008152//metabolic process
ENSGALG00000010180	GLIS3	PREDICTED: zinc finger protein GLIS3 isoform X2 [Gallus gallus]	-	-	-	-	GO:0043229//intracellular organelle;GO:0044464//cell part;GO:0005622//intracellular;GO:0044424//intracellular part;GO:0005623//cell;GO:0043231//intracellular membrane-bounded organelle;GO:0043226//organelle;GO:0043227//membrane-bounded organelle	GO:1901363//heterocyclic compound binding;GO:0001071//nucleic acid binding transcription factor activity;GO:0003676//nucleic acid binding;GO:0043169//cation binding;GO:0097159//organic cyclic compound binding;GO:0005488//binding;GO:0043167//ion binding	GO:0097659//nucleic acid-templated transcription;GO:0034645//cellular macromolecule biosynthetic process;GO:0046483//heterocycle metabolic process;GO:0016070//RNA metabolic process;GO:0044237//cellular metabolic process;GO:0044260//cellular macromolecule metabolic process;GO:0009059//macromolecule biosynthetic process;GO:1901576//organic substance biosynthetic process;GO:0034654//nucleobase-conta…
ENSGALG00000012577	FRMD3	PREDICTED: FERM domain-containing protein 3 isoform X5 [Gallus gallus]	-	-	-	-	GO:0043229//intracellular organelle;GO:0005622//intracellular;GO:0044424//intracellular part;GO:0043226//organelle;GO:0005623//cell;GO:0016020//membrane;GO:0044425//membrane part;GO:0043228//non-membrane-bounded organelle;GO:0044464//cell part;GO:0043232//intracellular non-membrane-bounded organelle	GO:0005515//protein binding;GO:0005488//binding	-
ENSGALG00000005361	HPRT	PREDICTED: hypoxanthine-guanine phosphoribosyltransferase-like [Gallus gallus]	Metabolism	Xenobiotics biodegradation and metabolism;Global and Overview;Nucleotide metabolism	ko01100//Metabolic pathways;ko01110//Biosynthesis of secondary metabolites;ko00230//Purine metabolism;ko00983//Drug metabolism - other enzymes	K00760	GO:0044424//intracellular part;GO:0005623//cell;GO:0044464//cell part;GO:0005622//intracellular	GO:0003824//catalytic activity	GO:0006807//nitrogen compound metabolic process;GO:0034654//nucleobase-containing compound biosynthetic process;GO:1901362//organic cyclic compound biosynthetic process;GO:0044271//cellular nitrogen compound biosynthetic process;GO:0043101//purine-containing compound salvage;GO:1901576//organic substance biosynthetic process;GO:0043094//cellular metabolic compound salvage;GO:1901564//organonitrog…
ENSGALG00000015742	RM39	PREDICTED: 39S ribosomal protein L39, mitochondrial isoform X2 [Gallus gallus]	-	-	-	-	GO:0043227//membrane-bounded organelle;GO:0005623//cell;GO:0043229//intracellular organelle;GO:0005622//intracellular;GO:0044424//intracellular part;GO:0043231//intracellular membrane-bounded organelle;GO:0044464//cell part;GO:0043226//organelle	-	-
ENSGALG00000039268	LV1	immunoglobulin lambda chain, partial [Gallus gallus]	-	-	-	-	-	-	-
ENSGALG00000011484	CKLF8	CKLF-like MARVEL transmembrane domain-containing protein 8 [Gallus gallus]	-	-	-	-	GO:0031224//intrinsic component of membrane;GO:0044425//membrane part;GO:0016020//membrane	-	-
ENSGALG00000015842	TIAM1	PREDICTED: T-lymphoma invasion and metastasis-inducing protein 1 isoform X13 [Gallus gallus]	Cellular Processes	Cell motility	ko04810//Regulation of actin cytoskeleton	K05731	GO:0019897//extrinsic component of plasma membrane;GO:0044459//plasma membrane part;GO:0019898//extrinsic component of membrane;GO:0044425//membrane part;GO:0044464//cell part;GO:0071944//cell periphery;GO:0005911//cell-cell junction;GO:0030054//cell junction;GO:0005623//cell;GO:0016020//membrane;GO:0005886//plasma membrane	GO:0005515//protein binding;GO:0008289//lipid binding;GO:0005102//receptor binding;GO:0098772//molecular function regulator;GO:0005089//Rho guanyl-nucleotide exchange factor activity;GO:0004871//signal transducer activity;GO:0005088//Ras guanyl-nucleotide exchange factor activity;GO:0005085//guanyl-nucleotide exchange factor activity;GO:0005488//binding	GO:0048731//system development;GO:0065009//regulation of molecular function;GO:0050790//regulation of catalytic activity;GO:0044767//single-organism developmental process;GO:0000902//cell morphogenesis;GO:0051179//localization;GO:0043087//regulation of GTPase activity;GO:0007167//enzyme linked receptor protein signaling pathway;GO:0031175//neuron projection development;GO:0007165//signal transduc…
ENSGALG00000017036	LHFP	PREDICTED: lipoma HMGIC fusion partner [Gallus gallus]	-	-	-	-	-	-	-
ENSGALG00000029034	CTXN3	cortexin-3 [Gallus gallus]	-	-	-	-	-	-	-
ENSGALG00000035501	KMT2D	Histone-lysine N-methyltransferase 2D, partial [Charadrius vociferus]	Metabolism	Amino acid metabolism	ko00310//Lysine degradation	K09187	GO:0043227//membrane-bounded organelle;GO:0044424//intracellular part;GO:1990234//transferase complex;GO:0043234//protein complex;GO:0005622//intracellular;GO:0043229//intracellular organelle;GO:1902494//catalytic complex;GO:0044464//cell part;GO:0032991//macromolecular complex;GO:0005623//cell;GO:0043231//intracellular membrane-bounded organelle;GO:0043226//organelle;GO:0034708//methyltransferas…	GO:0046872//metal ion binding;GO:0008276//protein methyltransferase activity;GO:1901363//heterocyclic compound binding;GO:0097159//organic cyclic compound binding;GO:0016279//protein-lysine N-methyltransferase activity;GO:0003824//catalytic activity;GO:0005488//binding;GO:0036094//small molecule binding;GO:0016740//transferase activity;GO:0008170//N-methyltransferase activity;GO:0003677//DNA bind…	GO:0010468//regulation of gene expression;GO:0009059//macromolecule biosynthetic process;GO:0046434//organophosphate catabolic process;GO:0044270//cellular nitrogen compound catabolic process;GO:0044699//single-organism process;GO:0007292//female gamete generation;GO:0044703//multi-organism reproductive process;GO:1902589//single-organism organelle organization;GO:0044238//primary metabolic proce…
ENSGALG00000005203	NOE3	PREDICTED: noelin-3 isoformX1 [Gallus gallus]	-	-	-	-	GO:1990351//transporter complex;GO:0044424//intracellular part;GO:0043234//protein complex;GO:0043229//intracellular organelle;GO:0044421//extracellular region part;GO:0098796//membrane protein complex;GO:0005886//plasma membrane;GO:0031224//intrinsic component of membrane;GO:0043235//receptor complex;GO:0005622//intracellular;GO:1902495//transmembrane transporter complex;GO:0043227//membrane-bou…	-	GO:0044763//single-organism cellular process;GO:0048731//system development;GO:0044767//single-organism developmental process;GO:0009887//organ morphogenesis;GO:0090596//sensory organ morphogenesis;GO:0046530//photoreceptor cell differentiation;GO:0001654//eye development;GO:0032502//developmental process;GO:0030154//cell differentiation;GO:0048869//cellular developmental process;GO:0009653//anat…
ENSGALG00000008204	FEM1C	PREDICTED: protein fem-1 homolog C isoform X4 [Gallus gallus]	-	-	-	-	-	-	-
ENSGALG00000044067	--	PREDICTED: uncharacterized protein LOC101751732 [Gallus gallus]	-	-	-	-	-	-	-
ENSGALG00000000234	E41LA	PREDICTED: erythrocyte membrane protein band 4.1 like 4A isoform X2 [Gallus gallus]	-	-	-	-	GO:0005623//cell;GO:0043228//non-membrane-bounded organelle;GO:0043232//intracellular non-membrane-bounded organelle;GO:0044464//cell part;GO:0043226//organelle;GO:0044424//intracellular part;GO:0005622//intracellular;GO:0043229//intracellular organelle	-	-
ENSGALG00000031129	HMCN1	PREDICTED: LOW QUALITY PROTEIN: hemicentin-1 [Gallus gallus]	-	-	-	-	-	-	-
ENSGALG00000008460	ANCHR	zinc finger FYVE domain-containing protein 19 [Gallus gallus]	-	-	-	-	-	GO:0005488//binding;GO:0043169//cation binding;GO:0043167//ion binding	-
ENSGALG00000015107	PI51B	phosphatidylinositol 4-phosphate 5-kinase type-1 beta [Gallus gallus]	Cellular Processes;Environmental Information Processing;Metabolism	Carbohydrate metabolism;Global and Overview;Transport and catabolism;Signal transduction;Cell motility	ko01100//Metabolic pathways;ko04144//Endocytosis;ko04810//Regulation of actin cytoskeleton;ko04070//Phosphatidylinositol signaling system;ko00562//Inositol phosphate metabolism	K00889	GO:0044464//cell part;GO:0005623//cell	GO:0032549//ribonucleoside binding;GO:0032550//purine ribonucleoside binding;GO:0005488//binding;GO:0001883//purine nucleoside binding;GO:0016740//transferase activity;GO:0097367//carbohydrate derivative binding;GO:0016772//transferase activity, transferring phosphorus-containing groups;GO:0001882//nucleoside binding;GO:0016301//kinase activity;GO:0016307//phosphatidylinositol phosphate kinase ac…	-
ENSGALG00000034760	ATL1	PREDICTED: ADAMTS-like protein 1, partial [Apaloderma vittatum]	-	-	-	-	GO:0031012//extracellular matrix	GO:0016787//hydrolase activity;GO:0046914//transition metal ion binding;GO:0008233//peptidase activity;GO:0070011//peptidase activity, acting on L-amino acid peptides;GO:0003824//catalytic activity;GO:0046872//metal ion binding;GO:0043169//cation binding;GO:0005488//binding;GO:0043167//ion binding	-
ENSGALG00000015109	ZO2	tight junction protein ZO-2 [Gallus gallus]	Cellular Processes	Cellular commiunity	ko04530//Tight junction	K06098	GO:0016020//membrane;GO:0005911//cell-cell junction;GO:0030054//cell junction;GO:0043296//apical junction complex	GO:0046872//metal ion binding;GO:0005488//binding;GO:0046914//transition metal ion binding;GO:0005506//iron ion binding;GO:0043169//cation binding;GO:0043167//ion binding	GO:0008152//metabolic process;GO:0009058//biosynthetic process
ENSGALG00000046435	GAK8	PREDICTED: LOW QUALITY PROTEIN: endogenous retrovirus group K member 6 Pol protein-like [Corvus cornix cornix]	-	-	-	-	-	-	-
ENSGALG00000038995	GRIA4	PREDICTED: glutamate receptor 4 isoform X3 [Zonotrichia albicollis]	Environmental Information Processing	Signaling molecules and interaction	ko04080//Neuroactive ligand-receptor interaction	K05200	-	-	-

## Sheet: b
Table S6b-The putative locus and candidate genes of WHCY (CG vs. WHCY)
GeneID	Symbol	Description	KEGG_A_class	KEGG_B_class	Pathway	K_ID	GO Component	GO Function	GO Process
ENSGALG00000009946	HECD1	PREDICTED: E3 ubiquitin-protein ligase HECTD1 isoform X6 [Gallus gallus]	-	-	-	-	-	GO:0016740//transferase activity;GO:0005488//binding;GO:0043169//cation binding;GO:0043167//ion binding;GO:0019787//ubiquitin-like protein transferase activity;GO:0003824//catalytic activity	GO:0035295//tube development;GO:0009653//anatomical structure morphogenesis;GO:0044260//cellular macromolecule metabolic process;GO:0035239//tube morphogenesis;GO:0048646//anatomical structure formation involved in morphogenesis;GO:0009888//tissue development;GO:0021915//neural tube development;GO:0008152//metabolic process;GO:0044699//single-organism process;GO:0009790//embryo development;GO:001…
ENSGALG00000045682	ADCYA	PREDICTED: adenylate cyclase type 10-like isoform X5 [Gallus gallus]	Metabolism	Nucleotide metabolism	ko00230//Purine metabolism	K11265	-	GO:0016829//lyase activity;GO:0003824//catalytic activity	GO:0050789//regulation of biological process;GO:0044763//single-organism cellular process;GO:0044699//single-organism process;GO:0050794//regulation of cellular process;GO:0044700//single organism signaling;GO:0065007//biological regulation;GO:0009987//cellular process;GO:0023052//signaling;GO:0050896//response to stimulus;GO:0007165//signal transduction;GO:0007154//cell communication;GO:0051716/…
ENSGALG00000005162	RBM40	PREDICTED: RNA-binding protein 40 isoform X10 [Gallus gallus]	-	-	-	-	GO:0043226//organelle;GO:0030529//intracellular ribonucleoprotein complex;GO:0043231//intracellular membrane-bounded organelle;GO:0044422//organelle part;GO:0005634//nucleus;GO:0005623//cell;GO:0043229//intracellular organelle;GO:0044424//intracellular part;GO:0044428//nuclear part;GO:1990904//ribonucleoprotein complex;GO:0044464//cell part;GO:0043227//membrane-bounded organelle;GO:0005622//intra…	GO:0005488//binding;GO:0097159//organic cyclic compound binding	-
ENSGALG00000015154	TRPM6	PREDICTED: transient receptor potential cation channel subfamily M member 6 [Gallus gallus]	-	-	-	-	-	-	-
ENSGALG00000046307	SPAG4	PREDICTED: sperm-associated antigen 4 protein-like isoform X1 [Gallus gallus]	-	-	-	-	-	-	-
ENSGALG00000002308	COMDA	COMM domain-containing protein 10 [Gallus gallus]	-	-	-	-	-	-	-
ENSGALG00000044727	AN34B	PREDICTED: LOW QUALITY PROTEIN: ankyrin repeat domain-containing protein 34B [Meleagris gallopavo]	-	-	-	-	-	-	-
ENSGALG00000012595	CBPC1	cytosolic carboxypeptidase 1 [Gallus gallus]	-	-	-	-	GO:0016471//vacuolar proton-transporting V-type ATPase complex;GO:0043226//organelle;GO:0043234//protein complex;GO:0043227//membrane-bounded organelle;GO:0005737//cytoplasm;GO:0098805//whole membrane;GO:0044424//intracellular part;GO:0044437//vacuolar part;GO:0044446//intracellular organelle part;GO:0098588//bounding membrane of organelle;GO:0005623//cell;GO:0005774//vacuolar membrane;GO:0032991…	GO:0005515//protein binding;GO:0008324//cation transmembrane transporter activity;GO:0043167//ion binding;GO:0043169//cation binding;GO:0008092//cytoskeletal protein binding;GO:0016787//hydrolase activity;GO:0008237//metallopeptidase activity;GO:0005215//transporter activity;GO:0022892//substrate-specific transporter activity;GO:0008235//metalloexopeptidase activity;GO:0022891//substrate-specific…	GO:0015992//proton transport;GO:0065008//regulation of biological quality;GO:0044260//cellular macromolecule metabolic process;GO:0007275//multicellular organism development;GO:0048513//animal organ development;GO:0071840//cellular component organization or biogenesis;GO:0015988//energy coupled proton transmembrane transport, against electrochemical gradient;GO:0007417//central nervous system dev…
ENSGALG00000035501	KMT2D	Histone-lysine N-methyltransferase 2D, partial [Charadrius vociferus]	Metabolism	Amino acid metabolism	ko00310//Lysine degradation	K09187	GO:0043227//membrane-bounded organelle;GO:0044424//intracellular part;GO:1990234//transferase complex;GO:0043234//protein complex;GO:0005622//intracellular;GO:0043229//intracellular organelle;GO:1902494//catalytic complex;GO:0044464//cell part;GO:0032991//macromolecular complex;GO:0005623//cell;GO:0043231//intracellular membrane-bounded organelle;GO:0043226//organelle;GO:0034708//methyltransferas…	GO:0046872//metal ion binding;GO:0008276//protein methyltransferase activity;GO:1901363//heterocyclic compound binding;GO:0097159//organic cyclic compound binding;GO:0016279//protein-lysine N-methyltransferase activity;GO:0003824//catalytic activity;GO:0005488//binding;GO:0036094//small molecule binding;GO:0016740//transferase activity;GO:0008170//N-methyltransferase activity;GO:0003677//DNA bind…	GO:0010468//regulation of gene expression;GO:0009059//macromolecule biosynthetic process;GO:0046434//organophosphate catabolic process;GO:0044270//cellular nitrogen compound catabolic process;GO:0044699//single-organism process;GO:0007292//female gamete generation;GO:0044703//multi-organism reproductive process;GO:1902589//single-organism organelle organization;GO:0044238//primary metabolic proce…
ENSGALG00000012575	TLE1	PREDICTED: transducin-like enhancer protein 1 isoformX2 [Gallus gallus]	-	-	-	-	GO:0043229//intracellular organelle;GO:0043231//intracellular membrane-bounded organelle;GO:0043234//protein complex;GO:0043227//membrane-bounded organelle;GO:0005623//cell;GO:0043226//organelle;GO:0005737//cytoplasm;GO:0005622//intracellular;GO:0032991//macromolecular complex;GO:0044444//cytoplasmic part;GO:0044424//intracellular part;GO:0044464//cell part	GO:0003712//transcription cofactor activity;GO:0001104//RNA polymerase II transcription cofactor activity;GO:0005488//binding;GO:0001076//transcription factor activity, RNA polymerase II transcription factor binding;GO:0000989//transcription factor activity, transcription factor binding;GO:0000988//transcription factor activity, protein binding;GO:0005515//protein binding	GO:0097659//nucleic acid-templated transcription;GO:0043067//regulation of programmed cell death;GO:0035556//intracellular signal transduction;GO:0006366//transcription from RNA polymerase II promoter;GO:0044699//single-organism process;GO:0043170//macromolecule metabolic process;GO:0019438//aromatic compound biosynthetic process;GO:0006351//transcription, DNA-templated;GO:0032774//RNA biosynthet…
ENSGALG00000003726	EGFLA	PREDICTED: pikachurin isoform X4 [Gallus gallus]	-	-	-	-	GO:0005578//proteinaceous extracellular matrix;GO:0005576//extracellular region;GO:0031012//extracellular matrix;GO:0044421//extracellular region part	GO:0005488//binding;GO:0097367//carbohydrate derivative binding	GO:0044267//cellular protein metabolic process;GO:0043170//macromolecule metabolic process;GO:0008152//metabolic process;GO:0044260//cellular macromolecule metabolic process;GO:0009987//cellular process;GO:0010810//regulation of cell-substrate adhesion;GO:0006464//cellular protein modification process;GO:0050794//regulation of cellular process;GO:0016043//cellular component organization;GO:004423…
ENSGALG00000012612	F16P2	PREDICTED: fructose-1,6-bisphosphatase isozyme 2 [Gallus gallus]	Organismal Systems;Metabolism	Global and Overview;Endocrine system;Carbohydrate metabolism	ko01100//Metabolic pathways;ko01110//Biosynthesis of secondary metabolites;ko01130//Biosynthesis of antibiotics;ko01120//Microbial metabolism in diverse environments;ko04910//Insulin signaling pathway;ko01200//Carbon metabolism;ko00010//Glycolysis / Gluconeogenesis;ko00051//Fructose and mannose metabolism;ko00030//Pentose phosphate pathway	K03841	-	GO:0042578//phosphoric ester hydrolase activity;GO:0003824//catalytic activity;GO:0016787//hydrolase activity;GO:0050308//sugar-phosphatase activity;GO:0019203//carbohydrate phosphatase activity;GO:0016788//hydrolase activity, acting on ester bonds;GO:0016791//phosphatase activity	GO:0006796//phosphate-containing compound metabolic process;GO:0006793//phosphorus metabolic process;GO:0008152//metabolic process;GO:0044238//primary metabolic process;GO:0044237//cellular metabolic process;GO:0009987//cellular process
ENSGALG00000002854	PDZD2	PREDICTED: PDZ domain-containing protein 2 isoform X13 [Gallus gallus]	-	-	-	-	GO:0044464//cell part;GO:0005623//cell;GO:0005622//intracellular;GO:0044424//intracellular part	-	-
ENSGALG00000015205	TYRP1	5,6-dihydroxyindole-2-carboxylic acid oxidase precursor [Gallus gallus]	Organismal Systems;Metabolism	Amino acid metabolism;Global and Overview;Endocrine system	ko01100//Metabolic pathways;ko04916//Melanogenesis;ko00350//Tyrosine metabolism	K00506	GO:0043226//organelle;GO:0098588//bounding membrane of organelle;GO:0012505//endomembrane system;GO:0044464//cell part;GO:0005768//endosome;GO:0030135//coated vesicle;GO:0031090//organelle membrane;GO:0044422//organelle part;GO:0005623//cell;GO:0044433//cytoplasmic vesicle part;GO:0098805//whole membrane;GO:0044440//endosomal part;GO:0005622//intracellular;GO:0043227//membrane-bounded organelle;G…	GO:0046983//protein dimerization activity;GO:0046872//metal ion binding;GO:0043167//ion binding;GO:0016491//oxidoreductase activity;GO:0005488//binding;GO:0004497//monooxygenase activity;GO:0043169//cation binding;GO:0005515//protein binding;GO:0003824//catalytic activity;GO:0046914//transition metal ion binding	GO:0048869//cellular developmental process;GO:0009987//cellular process;GO:0016050//vesicle organization;GO:0018958//phenol-containing compound metabolic process;GO:0030154//cell differentiation;GO:0006582//melanin metabolic process;GO:0006725//cellular aromatic compound metabolic process;GO:0008152//metabolic process;GO:0006996//organelle organization;GO:0043436//oxoacid metabolic process;GO:004…
ENSGALG00000002341	AP3S1	AP-3 complex subunit sigma-1 [Gallus gallus]	Cellular Processes	Transport and catabolism	ko04142//Lysosome	K12399	GO:0044424//intracellular part;GO:0048475//coated membrane;GO:0012505//endomembrane system;GO:0005622//intracellular;GO:0044425//membrane part;GO:0044422//organelle part;GO:0044464//cell part;GO:0043231//intracellular membrane-bounded organelle;GO:0031988//membrane-bounded vesicle;GO:0043226//organelle;GO:0032991//macromolecular complex;GO:0044444//cytoplasmic part;GO:0016020//membrane;GO:0005737…	GO:0022892//substrate-specific transporter activity;GO:0005215//transporter activity;GO:0005488//binding	GO:0007165//signal transduction;GO:0006810//transport;GO:1902578//single-organism localization;GO:0051656//establishment of organelle localization;GO:0033036//macromolecule localization;GO:0007166//cell surface receptor signaling pathway;GO:0010970//establishment of localization by movement along microtubule;GO:0016192//vesicle-mediated transport;GO:0048489//synaptic vesicle transport;GO:0044763/…
ENSGALG00000000734	RFA2	replication protein A 32 kDa subunit [Gallus gallus]	Genetic Information Processing	Replication and repair	ko03460//Fanconi anemia pathway;ko03420//Nucleotide excision repair;ko03030//DNA replication;ko03440//Homologous recombination;ko03430//Mismatch repair	K10739	-	GO:1901363//heterocyclic compound binding;GO:0003676//nucleic acid binding;GO:0097159//organic cyclic compound binding;GO:0005488//binding	-
ENSGALG00000014664	K0825	2210408I21Rik protein [Mus musculus]	-	-	-	-	-	-	-
ENSGALG00000000723	STX12	PREDICTED: syntaxin-12 isoform X1 [Gallus gallus]	Cellular Processes	Transport and catabolism	ko04145//Phagosome	K13813	GO:0005622//intracellular;GO:0005829//cytosol;GO:0043229//intracellular organelle;GO:0016020//membrane;GO:0031982//vesicle;GO:0032991//macromolecular complex;GO:0044425//membrane part;GO:0030139//endocytic vesicle;GO:0044464//cell part;GO:0043234//protein complex;GO:0005623//cell;GO:0005737//cytoplasm;GO:0043227//membrane-bounded organelle;GO:0043226//organelle;GO:0044444//cytoplasmic part;GO:004…	GO:0005515//protein binding;GO:0005488//binding	GO:0031647//regulation of protein stability;GO:0030301//cholesterol transport;GO:0008104//protein localization;GO:0015918//sterol transport;GO:0010876//lipid localization;GO:0045184//establishment of protein localization;GO:0071702//organic substance transport;GO:0015031//protein transport;GO:1902578//single-organism localization;GO:0044699//single-organism process;GO:0051234//establishment of lo…
ENSGALG00000039997	FBP1	Fibropellin-1, partial [Columba livia]	-	-	-	-	-	-	-
ENSGALG00000030305	XKR8	XK-related protein 8 [Gallus gallus]	-	-	-	-	GO:0044425//membrane part;GO:0031224//intrinsic component of membrane;GO:0016020//membrane	-	GO:0006897//endocytosis;GO:0044765//single-organism transport;GO:0010324//membrane invagination;GO:0009987//cellular process;GO:0051179//localization;GO:1902578//single-organism localization;GO:0007009//plasma membrane organization;GO:0097035//regulation of membrane lipid distribution;GO:0006810//transport;GO:0016043//cellular component organization;GO:0010256//endomembrane system organization;GO…
ENSGALG00000045245	ADCYA	PREDICTED: adenylate cyclase type 10-like isoform X5 [Gallus gallus]	Metabolism	Nucleotide metabolism	ko00230//Purine metabolism	K11265	-	GO:0016829//lyase activity;GO:0003824//catalytic activity	GO:0023052//signaling;GO:0044700//single organism signaling;GO:0065007//biological regulation;GO:0050789//regulation of biological process;GO:0050794//regulation of cellular process;GO:0009987//cellular process;GO:0051716//cellular response to stimulus;GO:0007165//signal transduction;GO:0044699//single-organism process;GO:0050896//response to stimulus;GO:0044763//single-organism cellular process;…
ENSGALG00000015096	SH3G2	endophilin-A1 [Gallus gallus]	Cellular Processes	Transport and catabolism	ko04144//Endocytosis	K11247	GO:0005622//intracellular;GO:0044464//cell part;GO:0044424//intracellular part;GO:0005623//cell	GO:0005515//protein binding;GO:0005488//binding	GO:0006897//endocytosis;GO:0006810//transport;GO:0051234//establishment of localization;GO:0016192//vesicle-mediated transport;GO:0065007//biological regulation;GO:0050794//regulation of cellular process;GO:0051179//localization;GO:0019222//regulation of metabolic process;GO:0050789//regulation of biological process;GO:0031323//regulation of cellular metabolic process
ENSGALG00000005180	COBA1	PREDICTED: collagen alpha-1(XI) chain isoformX1 [Gallus gallus]	-	-	-	-	-	-	GO:0007275//multicellular organism development;GO:0048731//system development;GO:0044699//single-organism process;GO:0048856//anatomical structure development;GO:0032502//developmental process;GO:0044707//single-multicellular organism process;GO:0044767//single-organism developmental process;GO:0032501//multicellular organismal process;GO:0048513//animal organ development
ENSGALG00000031702	KMT2D	PREDICTED: LOW QUALITY PROTEIN: histone-lysine N-methyltransferase MLL2, partial [Gallus gallus]	Metabolism	Amino acid metabolism	ko00310//Lysine degradation	K09187	-	GO:0043169//cation binding;GO:0005488//binding;GO:0046872//metal ion binding;GO:0016740//transferase activity;GO:0003824//catalytic activity;GO:0043167//ion binding	GO:0051716//cellular response to stimulus;GO:0007165//signal transduction;GO:0043170//macromolecule metabolic process;GO:0008152//metabolic process;GO:0007154//cell communication;GO:0009987//cellular process;GO:0023052//signaling;GO:0044238//primary metabolic process;GO:0050789//regulation of biological process;GO:0050896//response to stimulus;GO:0044763//single-organism cellular process;GO:00442…
ENSGALG00000041089	PDZD2	PREDICTED: PDZ domain-containing protein 2 isoform X14 [Gallus gallus]	-	-	-	-	-	-	-
ENSGALG00000002578	APH1A	PREDICTED: gamma-secretase subunit Aph-1b isoform X1 [Gallus gallus]	Environmental Information Processing	Signal transduction	ko04330//Notch signaling pathway	K06172	GO:0016020//membrane;GO:0044425//membrane part;GO:0031224//intrinsic component of membrane	-	GO:0043170//macromolecule metabolic process;GO:0019538//protein metabolic process;GO:0010467//gene expression;GO:0065007//biological regulation;GO:0071704//organic substance metabolic process;GO:0065009//regulation of molecular function;GO:0044238//primary metabolic process;GO:0051604//protein maturation;GO:0008152//metabolic process;GO:0044093//positive regulation of molecular function
ENSGALG00000005105	TPR	PREDICTED: nucleoprotein TPR isoform X6 [Gallus gallus]	Genetic Information Processing	Translation	ko03013//RNA transport	K09291	GO:0044464//cell part;GO:0044424//intracellular part;GO:0044428//nuclear part;GO:0005875//microtubule associated complex;GO:0043234//protein complex;GO:0031975//envelope;GO:0032991//macromolecular complex;GO:0043232//intracellular non-membrane-bounded organelle;GO:0031967//organelle envelope;GO:0000775//chromosome, centromeric region;GO:0005694//chromosome;GO:0031981//nuclear lumen;GO:0005635//nu…	GO:0046983//protein dimerization activity;GO:0097159//organic cyclic compound binding;GO:0005515//protein binding;GO:0019900//kinase binding;GO:0044877//macromolecular complex binding;GO:0032403//protein complex binding;GO:0019899//enzyme binding;GO:0005488//binding;GO:0008092//cytoskeletal protein binding;GO:0044822//poly(A) RNA binding;GO:0003723//RNA binding;GO:0005215//transporter activity;GO…	GO:1903308//regulation of chromatin modification;GO:0050658//RNA transport;GO:0009059//macromolecule biosynthetic process;GO:0031445//regulation of heterochromatin assembly;GO:0051236//establishment of RNA localization;GO:0006997//nucleus organization;GO:0045841//negative regulation of mitotic metaphase/anaphase transition;GO:0044763//single-organism cellular process;GO:0033045//regulation of sis…
ENSGALG00000015540	RD23B	PREDICTED: UV excision repair protein RAD23 homolog B isoform X4 [Gallus gallus]	Genetic Information Processing	Replication and repair;Folding, sorting and degradation	ko04141//Protein processing in endoplasmic reticulum;ko03420//Nucleotide excision repair	K10839	GO:0032991//macromolecular complex;GO:0044422//organelle part;GO:0044464//cell part;GO:1990391//DNA repair complex;GO:0043227//membrane-bounded organelle;GO:0005634//nucleus;GO:0005623//cell;GO:0005622//intracellular;GO:0044424//intracellular part;GO:0043231//intracellular membrane-bounded organelle;GO:0043229//intracellular organelle;GO:0044446//intracellular organelle part;GO:0043234//protein c…	GO:0003676//nucleic acid binding;GO:0005515//protein binding;GO:0043130//ubiquitin binding;GO:0003677//DNA binding;GO:0032182//ubiquitin-like protein binding;GO:0005488//binding;GO:1901363//heterocyclic compound binding;GO:0097159//organic cyclic compound binding	GO:0048232//male gamete generation;GO:0019222//regulation of metabolic process;GO:0044265//cellular macromolecule catabolic process;GO:0006508//proteolysis;GO:0051603//proteolysis involved in cellular protein catabolic process;GO:0044702//single organism reproductive process;GO:1903362//regulation of cellular protein catabolic process;GO:0009057//macromolecule catabolic process;GO:0000003//reprod…
ENSGALG00000007963	NFAC2	PREDICTED: nuclear factor of activated T-cells, cytoplasmic 2 isoform X10 [Gallus gallus]	Environmental Information Processing	Signal transduction	ko04310//Wnt signaling pathway;ko04370//VEGF signaling pathway	K17332	GO:0043231//intracellular membrane-bounded organelle;GO:0043226//organelle;GO:0044444//cytoplasmic part;GO:0044424//intracellular part;GO:0016020//membrane;GO:0043229//intracellular organelle;GO:0044464//cell part;GO:0032991//macromolecular complex;GO:0005737//cytoplasm;GO:0005622//intracellular;GO:0043232//intracellular non-membrane-bounded organelle;GO:0043228//non-membrane-bounded organelle;GO…	GO:0003677//DNA binding;GO:0097159//organic cyclic compound binding;GO:0003676//nucleic acid binding;GO:0000975//regulatory region DNA binding;GO:0001067//regulatory region nucleic acid binding;GO:1901363//heterocyclic compound binding;GO:0001071//nucleic acid binding transcription factor activity;GO:0005488//binding	GO:0050794//regulation of cellular process;GO:0048583//regulation of response to stimulus;GO:0050670//regulation of lymphocyte proliferation;GO:0050778//positive regulation of immune response;GO:0009058//biosynthetic process;GO:0006725//cellular aromatic compound metabolic process;GO:0002429//immune response-activating cell surface receptor signaling pathway;GO:0002694//regulation of leukocyte ac…
ENSGALG00000015019	FCHO2	PREDICTED: FCH domain only protein 2 isoform X3 [Gallus gallus]	-	-	-	-	GO:0030135//coated vesicle;GO:0012505//endomembrane system;GO:0031982//vesicle;GO:0044444//cytoplasmic part;GO:0043226//organelle;GO:0043231//intracellular membrane-bounded organelle;GO:0044464//cell part;GO:0005623//cell;GO:0005622//intracellular;GO:0031988//membrane-bounded vesicle;GO:0043227//membrane-bounded organelle;GO:0005737//cytoplasm;GO:0043229//intracellular organelle;GO:0031410//cytop…	GO:0005515//protein binding;GO:0005488//binding;GO:0044877//macromolecular complex binding;GO:0032403//protein complex binding	GO:0071840//cellular component organization or biogenesis;GO:0006810//transport;GO:0016043//cellular component organization;GO:0006900//membrane budding;GO:0051234//establishment of localization;GO:0006901//vesicle coating;GO:0016050//vesicle organization;GO:0006996//organelle organization;GO:0006897//endocytosis;GO:0009987//cellular process;GO:0016192//vesicle-mediated transport;GO:0006898//rece…
ENSGALG00000002539	KCNN2	small conductance calcium-activated potassium channel protein 2 [Gallus gallus]	-	-	-	-	GO:0036477//somatodendritic compartment;GO:0042383//sarcolemma;GO:0031224//intrinsic component of membrane;GO:0005622//intracellular;GO:0044425//membrane part;GO:0043229//intracellular organelle;GO:0097458//neuron part;GO:0043232//intracellular non-membrane-bounded organelle;GO:0012505//endomembrane system;GO:0042995//cell projection;GO:0044464//cell part;GO:0005886//plasma membrane;GO:0005623//c…	GO:0042805//actinin binding;GO:0022836//gated channel activity;GO:0022857//transmembrane transporter activity;GO:0022838//substrate-specific channel activity;GO:0005267//potassium channel activity;GO:0022891//substrate-specific transmembrane transporter activity;GO:0022892//substrate-specific transporter activity;GO:0005215//transporter activity;GO:0015077//monovalent inorganic cation transmembra…	GO:0050794//regulation of cellular process;GO:0032879//regulation of localization;GO:0044699//single-organism process;GO:0051234//establishment of localization;GO:0050789//regulation of biological process;GO:0006810//transport;GO:0065007//biological regulation;GO:0043269//regulation of ion transport;GO:0006811//ion transport;GO:0051049//regulation of transport;GO:0034765//regulation of ion transm…
ENSGALG00000027772	NANOG	Nanog homeobox [Gallus gallus]	-	-	-	-	GO:0044464//cell part;GO:0005623//cell;GO:0005622//intracellular;GO:0043229//intracellular organelle;GO:0043226//organelle;GO:0044424//intracellular part;GO:0043231//intracellular membrane-bounded organelle;GO:0043227//membrane-bounded organelle	GO:0005488//binding;GO:0003677//DNA binding;GO:0003676//nucleic acid binding;GO:0001071//nucleic acid binding transcription factor activity;GO:0097159//organic cyclic compound binding;GO:1901363//heterocyclic compound binding	GO:0034654//nucleobase-containing compound biosynthetic process;GO:0008152//metabolic process;GO:0019438//aromatic compound biosynthetic process;GO:0010467//gene expression;GO:0034645//cellular macromolecule biosynthetic process;GO:0006351//transcription, DNA-templated;GO:0071704//organic substance metabolic process;GO:0044271//cellular nitrogen compound biosynthetic process;GO:0018130//heterocyc…
ENSGALG00000037611	MYO3A	PREDICTED: myosin-IIIa isoform X6 [Gallus gallus]	-	-	-	-	-	-	-
ENSGALG00000008912	MDR1	PREDICTED: multidrug resistance protein 3 [Gallus gallus]	Environmental Information Processing	Membrane transport	ko02010//ABC transporters	K05658	GO:0031224//intrinsic component of membrane;GO:0044425//membrane part;GO:0016020//membrane	GO:0016818//hydrolase activity, acting on acid anhydrides, in phosphorus-containing anhydrides;GO:0022857//transmembrane transporter activity;GO:0097159//organic cyclic compound binding;GO:0001882//nucleoside binding;GO:0005488//binding;GO:0003824//catalytic activity;GO:0022804//active transmembrane transporter activity;GO:0016462//pyrophosphatase activity;GO:0016817//hydrolase activity, acting o…	GO:0071704//organic substance metabolic process;GO:0009117//nucleotide metabolic process;GO:0009150//purine ribonucleotide metabolic process;GO:0046434//organophosphate catabolic process;GO:0006139//nucleobase-containing compound metabolic process;GO:0019637//organophosphate metabolic process;GO:0044712//single-organism catabolic process;GO:0044763//single-organism cellular process;GO:0044270//ce…
ENSGALG00000002227	DMXL1	PREDICTED: Dmx-like 1 isoform X2 [Gallus gallus]	-	-	-	-	-	-	-
ENSGALG00000012594	NTRK2	BDNF/NT-3 growth factors receptor precursor [Gallus gallus]	Environmental Information Processing	Signal transduction	ko04010//MAPK signaling pathway	K04360	GO:0016020//membrane;GO:0044424//intracellular part;GO:0098589//membrane region;GO:0016021//integral component of membrane;GO:0005886//plasma membrane;GO:0033267//axon part;GO:0042995//cell projection;GO:0031224//intrinsic component of membrane;GO:0044444//cytoplasmic part;GO:0097060//synaptic membrane;GO:0044425//membrane part;GO:0044446//intracellular organelle part;GO:0043226//organelle;GO:009…	GO:0016740//transferase activity;GO:0004714//transmembrane receptor protein tyrosine kinase activity;GO:0016773//phosphotransferase activity, alcohol group as acceptor;GO:1901363//heterocyclic compound binding;GO:0004672//protein kinase activity;GO:0005488//binding;GO:0046983//protein dimerization activity;GO:0004871//signal transducer activity;GO:0097159//organic cyclic compound binding;GO:00973…	GO:0050794//regulation of cellular process;GO:0010941//regulation of cell death;GO:0048858//cell projection morphogenesis;GO:0007610//behavior;GO:0009887//organ morphogenesis;GO:0050790//regulation of catalytic activity;GO:0006928//movement of cell or subcellular component;GO:0046942//carboxylic acid transport;GO:0007169//transmembrane receptor protein tyrosine kinase signaling pathway;GO:0030900…
ENSGALG00000005848	I11RA	interleukin-11 receptor subunit alpha precursor [Gallus gallus]	Environmental Information Processing	Signaling molecules and interaction;Signal transduction	ko04060//Cytokine-cytokine receptor interaction;ko04630//Jak-STAT signaling pathway	K05056	-	GO:0004871//signal transducer activity;GO:0038023//signaling receptor activity;GO:0004888//transmembrane signaling receptor activity;GO:0060089//molecular transducer activity;GO:0004872//receptor activity;GO:0099600//transmembrane receptor activity	-
ENSGALG00000043775	RPGF3	PREDICTED: rap guanine nucleotide exchange factor 3 [Gallus gallus]	Organismal Systems	Circulatory system	ko04261//Adrenergic signaling in cardiomyocytes	K08014	GO:0005622//intracellular;GO:0044424//intracellular part;GO:0005623//cell;GO:0044464//cell part	GO:0019887//protein kinase regulator activity;GO:0005088//Ras guanyl-nucleotide exchange factor activity;GO:0098772//molecular function regulator;GO:0005085//guanyl-nucleotide exchange factor activity;GO:0030234//enzyme regulator activity;GO:0019207//kinase regulator activity	GO:0051336//regulation of hydrolase activity;GO:0001944//vasculature development;GO:0019222//regulation of metabolic process;GO:0044699//single-organism process;GO:0048468//cell development;GO:0065009//regulation of molecular function;GO:0046683//response to organophosphorus;GO:0050789//regulation of biological process;GO:0001885//endothelial cell development;GO:0033043//regulation of organelle o…
ENSGALG00000044067	--	PREDICTED: uncharacterized protein LOC101751732 [Gallus gallus]	-	-	-	-	-	-	-
ENSGALG00000025763	SPAG4	PREDICTED: SUN domain-containing protein 3-like isoform X3 [Gallus gallus]	-	-	-	-	-	-	-
ENSGALG00000017658	GAS1	PREDICTED: growth arrest-specific protein 1 [Gallus gallus]	Environmental Information Processing	Signal transduction	ko04340//Hedgehog signaling pathway	K06232	GO:0044425//membrane part;GO:0016020//membrane;GO:0031225//anchored component of membrane;GO:0031224//intrinsic component of membrane	-	GO:0044238//primary metabolic process;GO:0048736//appendage development;GO:0009653//anatomical structure morphogenesis;GO:0010646//regulation of cell communication;GO:0048522//positive regulation of cellular process;GO:0006810//transport;GO:0030030//cell projection organization;GO:0048518//positive regulation of biological process;GO:0000904//cell morphogenesis involved in differentiation;GO:0051…
ENSGALG00000040151	PCLO	PREDICTED: protein piccolo-like, partial [Phalacrocorax carbo]	Organismal Systems	Endocrine system	ko04911//Insulin secretion	K16882	-	GO:0005515//protein binding;GO:0043168//anion binding;GO:0046872//metal ion binding;GO:0043169//cation binding;GO:0043167//ion binding;GO:0005543//phospholipid binding;GO:0005488//binding;GO:0008289//lipid binding	GO:0006810//transport;GO:0051649//establishment of localization in cell;GO:0051179//localization;GO:0050896//response to stimulus;GO:0042886//amide transport;GO:0030072//peptide hormone secretion;GO:0050794//regulation of cellular process;GO:0071702//organic substance transport;GO:0071705//nitrogen compound transport;GO:0023052//signaling;GO:0016043//cellular component organization;GO:0009914//ho…
ENSGALG00000014718	M3K1	PREDICTED: LOW QUALITY PROTEIN: mitogen-activated protein kinase kinase kinase 1 [Gallus gallus]	Organismal Systems;Environmental Information Processing;Genetic Information Processing	Signal transduction;Immune system;Folding, sorting and degradation;Endocrine system	ko04010//MAPK signaling pathway;ko04120//Ubiquitin mediated proteolysis;ko04912//GnRH signaling pathway;ko04622//RIG-I-like receptor signaling pathway	K04416	-	-	-
ENSGALG00000026928	KLF4	PREDICTED: Krueppel-like factor 4 isoform X2 [Gallus gallus]	-	-	-	-	GO:0005623//cell;GO:0043226//organelle;GO:0005694//chromosome;GO:0005622//intracellular;GO:0044464//cell part;GO:0043232//intracellular non-membrane-bounded organelle;GO:0000785//chromatin;GO:0043229//intracellular organelle;GO:0032991//macromolecular complex;GO:0044427//chromosomal part;GO:0044424//intracellular part;GO:0043228//non-membrane-bounded organelle;GO:0044446//intracellular organelle …	GO:0000989//transcription factor activity, transcription factor binding;GO:0000976//transcription regulatory region sequence-specific DNA binding;GO:0008134//transcription factor binding;GO:0003690//double-stranded DNA binding;GO:0003676//nucleic acid binding;GO:0001134//transcription factor activity, transcription factor recruiting;GO:0043565//sequence-specific DNA binding;GO:0044212//transcript…	GO:0050896//response to stimulus;GO:0008152//metabolic process;GO:0001818//negative regulation of cytokine production;GO:0006366//transcription from RNA polymerase II promoter;GO:0050789//regulation of biological process;GO:0009893//positive regulation of metabolic process;GO:0031326//regulation of cellular biosynthetic process;GO:0009891//positive regulation of biosynthetic process;GO:0051171//r…
ENSGALG00000037953	TBA1B	tubulin alpha-1B chain [Mus musculus]	Cellular Processes	Cellular commiunity;Transport and catabolism	ko04145//Phagosome;ko04540//Gap junction	K07374	GO:0043229//intracellular organelle;GO:0005874//microtubule;GO:0044430//cytoskeletal part;GO:0015630//microtubule cytoskeleton;GO:0044464//cell part;GO:0044446//intracellular organelle part;GO:0005856//cytoskeleton;GO:0044422//organelle part;GO:0044424//intracellular part;GO:0099512//supramolecular fiber;GO:0099513//polymeric cytoskeletal fiber;GO:0005623//cell;GO:0043228//non-membrane-bounded or…	GO:0001882//nucleoside binding;GO:0003723//RNA binding;GO:0003676//nucleic acid binding;GO:0017111//nucleoside-triphosphatase activity;GO:0001883//purine nucleoside binding;GO:0032549//ribonucleoside binding;GO:0016817//hydrolase activity, acting on acid anhydrides;GO:0003824//catalytic activity;GO:0097159//organic cyclic compound binding;GO:0036094//small molecule binding;GO:0005488//binding;GO:…	GO:1901565//organonitrogen compound catabolic process;GO:0034655//nucleobase-containing compound catabolic process;GO:0071840//cellular component organization or biogenesis;GO:0070670//response to interleukin-4;GO:0009150//purine ribonucleotide metabolic process;GO:0006163//purine nucleotide metabolic process;GO:0046700//heterocycle catabolic process;GO:0044270//cellular nitrogen compound catabol…
ENSGALG00000015655	PALM2	PREDICTED: paralemmin-2 isoform X2 [Anas platyrhynchos]	-	-	-	-	-	-	-
ENSGALG00000039970	ENDOU	PREDICTED: poly(U)-specific endoribonuclease [Gallus gallus]	-	-	-	-	-	GO:0060089//molecular transducer activity;GO:0016787//hydrolase activity;GO:0001871//pattern binding;GO:0005488//binding;GO:0003824//catalytic activity;GO:0038024//cargo receptor activity;GO:0004872//receptor activity	GO:0051179//localization;GO:0051234//establishment of localization;GO:0006897//endocytosis;GO:0002376//immune system process;GO:0016192//vesicle-mediated transport;GO:0006810//transport
ENSGALG00000043541	SRS11	PREDICTED: splicing regulatory glutamine/lysine-rich protein 1 isoform X9 [Gallus gallus]	-	-	-	-	GO:0044424//intracellular part;GO:0043226//organelle;GO:0043229//intracellular organelle;GO:0005623//cell;GO:0043231//intracellular membrane-bounded organelle;GO:0043227//membrane-bounded organelle;GO:0005622//intracellular;GO:0044464//cell part	GO:0097159//organic cyclic compound binding;GO:0005488//binding	-
ENSGALG00000014880	PARP8	PREDICTED: poly [ADP-ribose] polymerase 8 isoformX2 [Gallus gallus]	-	-	-	-	GO:0044464//cell part;GO:0005623//cell	GO:0016740//transferase activity;GO:0016763//transferase activity, transferring pentosyl groups;GO:0003824//catalytic activity;GO:0016757//transferase activity, transferring glycosyl groups	-
ENSGALG00000039525	CMTA1	PREDICTED: calmodulin-binding transcription activator 1 isoform X15 [Gallus gallus]	-	-	-	-	GO:0043229//intracellular organelle;GO:0043231//intracellular membrane-bounded organelle;GO:0005623//cell;GO:0043227//membrane-bounded organelle;GO:0005622//intracellular;GO:0044464//cell part;GO:0043226//organelle;GO:0044424//intracellular part	-	-
ENSGALG00000042197	WDR75	PREDICTED: WD repeat-containing protein 75 [Gallus gallus]	Genetic Information Processing	Translation	ko03008//Ribosome biogenesis in eukaryotes	K14552	GO:0005622//intracellular;GO:0005623//cell;GO:0043231//intracellular membrane-bounded organelle;GO:0043229//intracellular organelle;GO:0044464//cell part;GO:0044424//intracellular part;GO:0043227//membrane-bounded organelle;GO:0043226//organelle	-	-
ENSGALG00000005340	S35A3	UDP-N-acetylglucosamine transporter [Gallus gallus]	-	-	-	-	GO:0016020//membrane;GO:0044425//membrane part;GO:0031224//intrinsic component of membrane	GO:0015293//symporter activity;GO:0051119//sugar transmembrane transporter activity;GO:1901476//carbohydrate transporter activity;GO:0022804//active transmembrane transporter activity;GO:0015215//nucleotide transmembrane transporter activity;GO:0008324//cation transmembrane transporter activity;GO:0015605//organophosphate ester transmembrane transporter activity;GO:0022857//transmembrane transpor…	GO:0051179//localization;GO:0006862//nucleotide transport;GO:0015931//nucleobase-containing compound transport;GO:0051234//establishment of localization;GO:0044765//single-organism transport;GO:0015748//organophosphate ester transport;GO:0006818//hydrogen transport;GO:0071702//organic substance transport;GO:0071705//nitrogen compound transport;GO:1902578//single-organism localization;GO:0006810//…
ENSGALG00000015020	TM171	PREDICTED: transmembrane protein 171 isoform X7 [Gallus gallus]	-	-	-	-	-	-	-
ENSGALG00000002439	BDP1	PREDICTED: transcription factor TFIIIB component B'' homolog isoform X4 [Gallus gallus]	-	-	-	-	-	-	-
ENSGALG00000015208	ROR2	tyrosine-protein kinase transmembrane receptor ROR2 precursor [Gallus gallus]	-	-	-	-	GO:0031224//intrinsic component of membrane;GO:0044425//membrane part;GO:0016020//membrane	GO:0016773//phosphotransferase activity, alcohol group as acceptor;GO:0004713//protein tyrosine kinase activity;GO:1901363//heterocyclic compound binding;GO:0004672//protein kinase activity;GO:0016772//transferase activity, transferring phosphorus-containing groups;GO:0001883//purine nucleoside binding;GO:0001664//G-protein coupled receptor binding;GO:0005488//binding;GO:0097367//carbohydrate der…	GO:0016337//single organismal cell-cell adhesion;GO:0006139//nucleobase-containing compound metabolic process;GO:0090304//nucleic acid metabolic process;GO:0048584//positive regulation of response to stimulus;GO:0008283//cell proliferation;GO:0044710//single-organism metabolic process;GO:0035567//non-canonical Wnt signaling pathway;GO:0044260//cellular macromolecule metabolic process;GO:0048731//…
ENSGALG00000044949	ADCYA	PREDICTED: adenylate cyclase type 10-like isoform X7 [Gallus gallus]	Metabolism	Nucleotide metabolism	ko00230//Purine metabolism	K11265	-	GO:0016829//lyase activity;GO:0003824//catalytic activity	GO:0044700//single organism signaling;GO:0050794//regulation of cellular process;GO:0007154//cell communication;GO:0007165//signal transduction;GO:0051716//cellular response to stimulus;GO:0044763//single-organism cellular process;GO:0044699//single-organism process;GO:0050789//regulation of biological process;GO:0050896//response to stimulus;GO:0009987//cellular process;GO:0065007//biological re…
ENSGALG00000000731	THMS2	PREDICTED: protein THEMIS2 isoform X3 [Gallus gallus]	-	-	-	-	-	-	-
ENSGALG00000040266	GLI3	transcriptional activator GLI3 [Gallus gallus]	Environmental Information Processing	Signal transduction	ko04340//Hedgehog signaling pathway	K06230	GO:0044428//nuclear part;GO:0044446//intracellular organelle part;GO:0031981//nuclear lumen;GO:0005623//cell;GO:0031974//membrane-enclosed lumen;GO:0043227//membrane-bounded organelle;GO:0005622//intracellular;GO:0043233//organelle lumen;GO:0044444//cytoplasmic part;GO:0044451//nucleoplasm part;GO:0032991//macromolecular complex;GO:0043231//intracellular membrane-bounded organelle;GO:0044464//cel…	GO:0001071//nucleic acid binding transcription factor activity;GO:0005515//protein binding;GO:0003677//DNA binding;GO:0043167//ion binding;GO:0097159//organic cyclic compound binding;GO:1901363//heterocyclic compound binding;GO:0043169//cation binding;GO:0003676//nucleic acid binding;GO:0019899//enzyme binding;GO:0005488//binding	GO:0007420//brain development;GO:0051251//positive regulation of lymphocyte activation;GO:1903707//negative regulation of hemopoiesis;GO:0043009//chordate embryonic development;GO:0030178//negative regulation of Wnt signaling pathway;GO:0042476//odontogenesis;GO:0007423//sensory organ development;GO:0048663//neuron fate commitment;GO:0045619//regulation of lymphocyte differentiation;GO:0034613//c…
ENSGALG00000014995	PGM5	PREDICTED: phosphoglucomutase 5 [Gallus gallus]	-	-	-	-	GO:0030054//cell junction;GO:0005856//cytoskeleton;GO:0044449//contractile fiber part;GO:0043229//intracellular organelle;GO:0032432//actin filament bundle;GO:0070161//anchoring junction;GO:0031674//I band;GO:0005913//cell-cell adherens junction;GO:0043228//non-membrane-bounded organelle;GO:0044446//intracellular organelle part;GO:0005911//cell-cell junction;GO:0044424//intracellular part;GO:0030…	GO:0043169//cation binding;GO:0003824//catalytic activity;GO:0016853//isomerase activity;GO:0005488//binding;GO:0046872//metal ion binding;GO:0016866//intramolecular transferase activity;GO:0043167//ion binding	GO:0044238//primary metabolic process;GO:0008152//metabolic process
ENSGALG00000034230	SWT1	PREDICTED: transcriptional protein SWT1 isoform X7 [Gallus gallus]	-	-	-	-	-	-	-
ENSGALG00000043112	RPB1	PREDICTED: LOW QUALITY PROTEIN: DNA-directed RNA polymerase II subunit RPB1-like [Latimeria chalumnae]	Human Diseases;Metabolism;Genetic Information Processing	Infectious diseases;Transcription;Global and Overview;Nucleotide metabolism	ko01100//Metabolic pathways;ko05168//Herpes simplex infection;ko00230//Purine metabolism;ko00240//Pyrimidine metabolism;ko03020//RNA polymerase	K03006	-	-	-
ENSGALG00000005290	TRM13	PREDICTED: tRNA:m(4)X modification enzyme TRM13 homolog isoform X2 [Gallus gallus]	-	-	-	-	-	-	-
ENSGALG00000013085	PTPRO	receptor-type tyrosine-protein phosphatase O [Gallus gallus]	-	-	-	-	GO:0036477//somatodendritic compartment;GO:0042995//cell projection;GO:0030425//dendrite;GO:0005886//plasma membrane;GO:0044459//plasma membrane part;GO:0097458//neuron part;GO:0044464//cell part;GO:0005623//cell;GO:0043005//neuron projection;GO:0044425//membrane part;GO:0016020//membrane;GO:0071944//cell periphery	GO:0046983//protein dimerization activity;GO:0042578//phosphoric ester hydrolase activity;GO:0005515//protein binding;GO:0003824//catalytic activity;GO:0016791//phosphatase activity;GO:0004721//phosphoprotein phosphatase activity;GO:0005488//binding;GO:0016787//hydrolase activity;GO:0016788//hydrolase activity, acting on ester bonds	GO:0009968//negative regulation of signal transduction;GO:0048585//negative regulation of response to stimulus;GO:0072001//renal system development;GO:0044237//cellular metabolic process;GO:0007043//cell-cell junction assembly;GO:0023051//regulation of signaling;GO:0007399//nervous system development;GO:0048856//anatomical structure development;GO:0003071//renal system process involved in regulat…
ENSGALG00000006807	PLS5	PREDICTED: phospholipid scramblase family member 5 isoform X3 [Gallus gallus]	-	-	-	-	-	-	-
ENSGALG00000002399	TF2H2	PREDICTED: general transcription factor IIH subunit 2 isoform X1 [Gallus gallus]	Genetic Information Processing	Replication and repair;Transcription	ko03420//Nucleotide excision repair;ko03022//Basal transcription factors	K03142	GO:0005623//cell;GO:0043231//intracellular membrane-bounded organelle;GO:0032991//macromolecular complex;GO:0044446//intracellular organelle part;GO:0043234//protein complex;GO:0044422//organelle part;GO:0043226//organelle;GO:0043229//intracellular organelle;GO:0044428//nuclear part;GO:0005634//nucleus;GO:0044464//cell part;GO:0044424//intracellular part;GO:0000439//core TFIIH complex;GO:0043227/…	GO:0046872//metal ion binding;GO:0005488//binding;GO:0043167//ion binding;GO:0043169//cation binding;GO:0046914//transition metal ion binding	GO:0006950//response to stress;GO:0044238//primary metabolic process;GO:0044699//single-organism process;GO:0046483//heterocycle metabolic process;GO:0051716//cellular response to stimulus;GO:0006807//nitrogen compound metabolic process;GO:0006259//DNA metabolic process;GO:0043170//macromolecule metabolic process;GO:0033554//cellular response to stress;GO:0044763//single-organism cellular process…
ENSGALG00000011439	RBMS3	PREDICTED: LOW QUALITY PROTEIN: RNA-binding motif, single-stranded-interacting protein 3-like, partial [Nestor notabilis]	-	-	-	-	GO:0043227//membrane-bounded organelle;GO:0043226//organelle	GO:1901363//heterocyclic compound binding;GO:0003676//nucleic acid binding;GO:0005488//binding;GO:0097159//organic cyclic compound binding	-
ENSGALG00000006165	WDFY4	PREDICTED: LOW QUALITY PROTEIN: WD repeat- and FYVE domain-containing protein 4 [Gallus gallus]	-	-	-	-	-	-	-
ENSGALG00000015497	VGLL3	PREDICTED: transcription cofactor vestigial-like protein 3 isoform X2 [Gallus gallus]	-	-	-	-	-	-	GO:0034645//cellular macromolecule biosynthetic process;GO:0044271//cellular nitrogen compound biosynthetic process;GO:0034641//cellular nitrogen compound metabolic process;GO:0009059//macromolecule biosynthetic process;GO:0006725//cellular aromatic compound metabolic process;GO:0071704//organic substance metabolic process;GO:0018130//heterocycle biosynthetic process;GO:0006807//nitrogen compound…
ENSGALG00000000573	PER3	period circadian protein homolog 3 [Gallus gallus]	Human Diseases	Infectious diseases	ko05168//Herpes simplex infection	K02633	-	GO:0060089//molecular transducer activity	GO:0006725//cellular aromatic compound metabolic process;GO:0048511//rhythmic process;GO:0009059//macromolecule biosynthetic process;GO:0006351//transcription, DNA-templated;GO:0006139//nucleobase-containing compound metabolic process;GO:0044238//primary metabolic process;GO:0097659//nucleic acid-templated transcription;GO:1901362//organic cyclic compound biosynthetic process;GO:0046483//heterocy…
ENSGALG00000044423	--	PREDICTED: translation initiation factor IF-2-like [Gallus gallus]	-	-	-	-	-	-	-
ENSGALG00000005147	AMYP	amylase, alpha 1A salivary precursor [Gallus gallus]	Metabolism	Carbohydrate metabolism;Global and Overview	ko01100//Metabolic pathways;ko00500//Starch and sucrose metabolism	K01176	-	GO:0043167//ion binding;GO:0005488//binding;GO:0003824//catalytic activity;GO:0016787//hydrolase activity	GO:0044238//primary metabolic process;GO:0008152//metabolic process
ENSGALG00000030399	--	-	-	-	-	-	-	-	-
ENSGALG00000028186	RERG	PREDICTED: ras-related and estrogen-regulated growth inhibitor [Struthio camelus australis]	-	-	-	-	GO:0043231//intracellular membrane-bounded organelle;GO:0044464//cell part;GO:0043229//intracellular organelle;GO:0043226//organelle;GO:0044424//intracellular part;GO:0005622//intracellular;GO:0043227//membrane-bounded organelle;GO:0005737//cytoplasm;GO:0044444//cytoplasmic part;GO:0005623//cell	GO:0035257//nuclear hormone receptor binding;GO:0003824//catalytic activity;GO:0016817//hydrolase activity, acting on acid anhydrides;GO:0005488//binding;GO:0001883//purine nucleoside binding;GO:0097367//carbohydrate derivative binding;GO:0016462//pyrophosphatase activity;GO:0001882//nucleoside binding;GO:0097159//organic cyclic compound binding;GO:0032549//ribonucleoside binding;GO:0017111//nucl…	GO:0072521//purine-containing compound metabolic process;GO:1901361//organic cyclic compound catabolic process;GO:0019637//organophosphate metabolic process;GO:0046483//heterocycle metabolic process;GO:0009150//purine ribonucleotide metabolic process;GO:0044712//single-organism catabolic process;GO:0009154//purine ribonucleotide catabolic process;GO:0044270//cellular nitrogen compound catabolic p…
ENSGALG00000005252	GPR88	PREDICTED: probable G-protein coupled receptor 88, partial [Gallus gallus]	-	-	-	-	GO:0044425//membrane part;GO:0031224//intrinsic component of membrane;GO:0016020//membrane	-	GO:0044763//single-organism cellular process;GO:0007154//cell communication;GO:0007610//behavior;GO:0042391//regulation of membrane potential;GO:0001508//action potential;GO:0009987//cellular process;GO:0050905//neuromuscular process;GO:0050794//regulation of cellular process;GO:0050896//response to stimulus;GO:0065008//regulation of biological quality;GO:0050789//regulation of biological process…
ENSGALG00000034760	ATL1	PREDICTED: ADAMTS-like protein 1, partial [Apaloderma vittatum]	-	-	-	-	GO:0031012//extracellular matrix	GO:0016787//hydrolase activity;GO:0046914//transition metal ion binding;GO:0008233//peptidase activity;GO:0070011//peptidase activity, acting on L-amino acid peptides;GO:0003824//catalytic activity;GO:0046872//metal ion binding;GO:0043169//cation binding;GO:0005488//binding;GO:0043167//ion binding	-
ENSGALG00000015770	A4	amyloid beta A4 protein precursor [Gallus gallus]	-	-	-	-	GO:0043227//membrane-bounded organelle;GO:0043228//non-membrane-bounded organelle;GO:0043226//organelle;GO:0016020//membrane;GO:0005856//cytoskeleton;GO:0043232//intracellular non-membrane-bounded organelle;GO:0097458//neuron part;GO:0005623//cell;GO:0042995//cell projection;GO:0044424//intracellular part;GO:0005819//spindle;GO:0031982//vesicle;GO:0044430//cytoskeletal part;GO:0044444//cytoplasmi…	GO:0030234//enzyme regulator activity;GO:0005539//glycosaminoglycan binding;GO:0005102//receptor binding;GO:0005515//protein binding;GO:0004866//endopeptidase inhibitor activity;GO:0061134//peptidase regulator activity;GO:0098772//molecular function regulator;GO:0043167//ion binding;GO:0046872//metal ion binding;GO:0004857//enzyme inhibitor activity;GO:0061135//endopeptidase regulator activity;GO…	GO:0050801//ion homeostasis;GO:0006935//chemotaxis;GO:0048469//cell maturation;GO:0032774//RNA biosynthetic process;GO:0006807//nitrogen compound metabolic process;GO:0044770//cell cycle phase transition;GO:0031123//RNA 3'-end processing;GO:0051716//cellular response to stimulus;GO:0044703//multi-organism reproductive process;GO:0090304//nucleic acid metabolic process;GO:0009653//anatomical struc…
ENSGALG00000000579	VAMP3	vesicle-associated membrane protein 3 [Gallus gallus]	Genetic Information Processing;Cellular Processes	Folding, sorting and degradation;Transport and catabolism	ko04145//Phagosome;ko04130//SNARE interactions in vesicular transport	K13505	GO:0044425//membrane part;GO:0016020//membrane;GO:0043227//membrane-bounded organelle;GO:0031988//membrane-bounded vesicle;GO:0044464//cell part;GO:0005623//cell;GO:0031982//vesicle;GO:0031410//cytoplasmic vesicle;GO:0043231//intracellular membrane-bounded organelle;GO:0043226//organelle;GO:0005622//intracellular;GO:0043229//intracellular organelle;GO:0044444//cytoplasmic part;GO:0031224//intrins…	-	GO:0071840//cellular component organization or biogenesis;GO:0043112//receptor metabolic process;GO:0044765//single-organism transport;GO:0044260//cellular macromolecule metabolic process;GO:0006886//intracellular protein transport;GO:0071702//organic substance transport;GO:0000902//cell morphogenesis;GO:0051641//cellular localization;GO:0016192//vesicle-mediated transport;GO:0048468//cell develo…
ENSGALG00000033247	FMRF	Immunoglobulin G-binding protein A [Larimichthys crocea]	-	-	-	-	-	-	-
ENSGALG00000014681	NEC1	PREDICTED: neuroendocrine convertase 1 [Gallus gallus]	-	-	-	-	GO:0005576//extracellular region;GO:0044421//extracellular region part	GO:0070011//peptidase activity, acting on L-amino acid peptides;GO:0008233//peptidase activity;GO:0004175//endopeptidase activity;GO:0003824//catalytic activity;GO:0016787//hydrolase activity	GO:0044238//primary metabolic process;GO:0071704//organic substance metabolic process;GO:0006807//nitrogen compound metabolic process;GO:0006518//peptide metabolic process;GO:0051604//protein maturation;GO:0009987//cellular process;GO:0043170//macromolecule metabolic process;GO:0016485//protein processing;GO:0006508//proteolysis;GO:0034641//cellular nitrogen compound metabolic process;GO:0044237/…
ENSGALG00000014721	MIER3	PREDICTED: mesoderm induction early response protein 3 isoform X5 [Gallus gallus]	-	-	-	-	GO:0005623//cell;GO:0044464//cell part;GO:0043231//intracellular membrane-bounded organelle;GO:0043226//organelle;GO:0043227//membrane-bounded organelle;GO:0044424//intracellular part;GO:0005622//intracellular;GO:0043229//intracellular organelle	GO:0005488//binding	-
ENSGALG00000013225	VAT1L	PREDICTED: vesicle amine transport protein 1 homolog (T. californica)-like isoform X2 [Gallus gallus]	-	-	-	-	-	GO:0005488//binding;GO:0046872//metal ion binding;GO:0046914//transition metal ion binding;GO:0043167//ion binding;GO:0003824//catalytic activity;GO:0043169//cation binding	GO:0044710//single-organism metabolic process;GO:0044699//single-organism process;GO:0008152//metabolic process
ENSGALG00000014719	SETD9	PREDICTED: SET domain-containing protein 9 isoformX1 [Gallus gallus]	-	-	-	-	-	-	-
ENSGALG00000029660	MYH4	PREDICTED: myosin-13 [Gallus gallus]	Cellular Processes	Cellular commiunity	ko04530//Tight junction	K10352	-	-	-
ENSGALG00000028256	CCL19	chemokine (C-C motif) ligand 19 precursor [Gallus gallus]	Environmental Information Processing	Signaling molecules and interaction	ko04060//Cytokine-cytokine receptor interaction	K05512	-	GO:0005126//cytokine receptor binding;GO:0042379//chemokine receptor binding;GO:0005488//binding;GO:0048020//CCR chemokine receptor binding;GO:0005515//protein binding;GO:0005102//receptor binding;GO:0001664//G-protein coupled receptor binding;GO:0005125//cytokine activity	GO:0019222//regulation of metabolic process;GO:0044237//cellular metabolic process;GO:0080090//regulation of primary metabolic process;GO:0007154//cell communication;GO:0042306//regulation of protein import into nucleus;GO:0051049//regulation of transport;GO:0032844//regulation of homeostatic process;GO:0050795//regulation of behavior;GO:0051272//positive regulation of cellular component movement…
ENSGALG00000013200	GABR2	PREDICTED: gamma-aminobutyric acid type B receptor subunit 2-like [Pseudopodoces humilis]	Environmental Information Processing	Signaling molecules and interaction	ko04080//Neuroactive ligand-receptor interaction	K04615	GO:0032991//macromolecular complex;GO:0005623//cell;GO:0043235//receptor complex;GO:0031224//intrinsic component of membrane;GO:0044424//intracellular part;GO:0071944//cell periphery;GO:0031226//intrinsic component of plasma membrane;GO:0098797//plasma membrane protein complex;GO:0044464//cell part;GO:0016021//integral component of membrane;GO:0016020//membrane;GO:0042995//cell projection;GO:0097…	GO:0099600//transmembrane receptor activity;GO:0004888//transmembrane signaling receptor activity;GO:0004872//receptor activity;GO:0004871//signal transducer activity;GO:0060089//molecular transducer activity;GO:0038023//signaling receptor activity;GO:0004930//G-protein coupled receptor activity	GO:0007165//signal transduction;GO:0007186//G-protein coupled receptor signaling pathway;GO:0050896//response to stimulus;GO:0023052//signaling;GO:0050794//regulation of cellular process;GO:0044699//single-organism process;GO:0065007//biological regulation;GO:0044763//single-organism cellular process;GO:0007154//cell communication;GO:0044700//single organism signaling;GO:0050789//regulation of bi…
ENSGALG00000005284	LRC39	PREDICTED: leucine-rich repeat-containing protein 39 isoform X3 [Gallus gallus]	-	-	-	-	-	-	-
ENSGALG00000005208	S1PR1	PREDICTED: sphingosine 1-phosphate receptor 1 isoform X3 [Gallus gallus]	Environmental Information Processing	Signal transduction;Signaling molecules and interaction	ko04080//Neuroactive ligand-receptor interaction;ko04068//FoxO signaling pathway	K04288	GO:0016020//membrane;GO:0031224//intrinsic component of membrane;GO:0005623//cell;GO:0005886//plasma membrane;GO:0044464//cell part;GO:0071944//cell periphery;GO:0044425//membrane part	GO:0004871//signal transducer activity;GO:0004872//receptor activity;GO:0099600//transmembrane receptor activity;GO:0045125//bioactive lipid receptor activity;GO:0060089//molecular transducer activity;GO:0004888//transmembrane signaling receptor activity;GO:0038023//signaling receptor activity;GO:0004930//G-protein coupled receptor activity	GO:0007187//G-protein coupled receptor signaling pathway, coupled to cyclic nucleotide second messenger;GO:0032502//developmental process;GO:0023052//signaling;GO:0050794//regulation of cellular process;GO:0048856//anatomical structure development;GO:0007399//nervous system development;GO:0007188//adenylate cyclase-modulating G-protein coupled receptor signaling pathway;GO:0044707//single-multice…
ENSGALG00000037826	TESP1	PREDICTED: protein TESPA1 [Aquila chrysaetos canadensis]	-	-	-	-	-	-	-
ENSGALG00000045129	RTCA	PREDICTED: RNA 3'-terminal phosphate cyclase [Meleagris gallopavo]	-	-	-	-	GO:0044424//intracellular part;GO:0043231//intracellular membrane-bounded organelle;GO:0043227//membrane-bounded organelle;GO:0043226//organelle;GO:0005623//cell;GO:0005622//intracellular;GO:0044464//cell part;GO:0043229//intracellular organelle	GO:0005488//binding;GO:0003824//catalytic activity;GO:1901363//heterocyclic compound binding;GO:0009975//cyclase activity;GO:0001882//nucleoside binding;GO:0097159//organic cyclic compound binding;GO:0036094//small molecule binding;GO:0097367//carbohydrate derivative binding;GO:0001883//purine nucleoside binding;GO:0032549//ribonucleoside binding;GO:0032550//purine ribonucleoside binding	GO:0043170//macromolecule metabolic process;GO:0071704//organic substance metabolic process;GO:0008152//metabolic process;GO:0010467//gene expression
ENSGALG00000036447	A2ML1	PREDICTED: alpha-2-macroglobulin-like protein 1 [Taeniopygia guttata]	-	-	-	-	-	-	-
ENSGALG00000015496	CHM2B	charged multivesicular body protein 2b [Gallus gallus]	Cellular Processes	Transport and catabolism	ko04144//Endocytosis	K12192	GO:0044444//cytoplasmic part;GO:0043229//intracellular organelle;GO:0005770//late endosome;GO:0044464//cell part;GO:0043227//membrane-bounded organelle;GO:0005623//cell;GO:0044424//intracellular part;GO:0043231//intracellular membrane-bounded organelle;GO:0005622//intracellular;GO:0043226//organelle;GO:0005768//endosome;GO:0005737//cytoplasm;GO:0012505//endomembrane system	GO:0005515//protein binding;GO:0005488//binding	GO:0008104//protein localization;GO:0051179//localization;GO:0045184//establishment of protein localization;GO:0051234//establishment of localization;GO:0033036//macromolecule localization
ENSGALG00000002605	RM17	PREDICTED: 39S ribosomal protein L17, mitochondrial isoformX2 [Gallus gallus]	Genetic Information Processing	Translation	ko03010//Ribosome	K02879	GO:1990904//ribonucleoprotein complex;GO:0043227//membrane-bounded organelle;GO:0044422//organelle part;GO:0005622//intracellular;GO:0031090//organelle membrane;GO:0044424//intracellular part;GO:0031967//organelle envelope;GO:0019866//organelle inner membrane;GO:0043231//intracellular membrane-bounded organelle;GO:0044446//intracellular organelle part;GO:0031975//envelope;GO:0032991//macromolecul…	GO:0005515//protein binding;GO:0005198//structural molecule activity;GO:0005488//binding	GO:0010467//gene expression;GO:0008152//metabolic process;GO:0043170//macromolecule metabolic process;GO:0071704//organic substance metabolic process
ENSGALG00000036693	RHG22	PREDICTED: rho GTPase-activating protein 22 isoform X12 [Gallus gallus]	-	-	-	-	GO:0044464//cell part;GO:0005623//cell	GO:0008047//enzyme activator activity;GO:0030234//enzyme regulator activity;GO:0098772//molecular function regulator	GO:0019222//regulation of metabolic process;GO:0050789//regulation of biological process;GO:0065007//biological regulation;GO:0007154//cell communication;GO:0043087//regulation of GTPase activity;GO:0050790//regulation of catalytic activity;GO:0051336//regulation of hydrolase activity;GO:0009987//cellular process;GO:0065009//regulation of molecular function;GO:0044763//single-organism cellular pr…
ENSGALG00000014708	GSTK1	glutathione S-transferase kappa 1 [Gallus gallus]	Metabolism;Cellular Processes	Transport and catabolism;Metabolism of other amino acids;Xenobiotics biodegradation and metabolism	ko04146//Peroxisome;ko00480//Glutathione metabolism;ko00980//Metabolism of xenobiotics by cytochrome P450;ko00982//Drug metabolism - cytochrome P450	K13299	GO:0005622//intracellular;GO:0044422//organelle part;GO:0044444//cytoplasmic part;GO:0042579//microbody;GO:0016020//membrane;GO:0031975//envelope;GO:0043227//membrane-bounded organelle;GO:0019866//organelle inner membrane;GO:0044464//cell part;GO:0005737//cytoplasm;GO:0043229//intracellular organelle;GO:0031090//organelle membrane;GO:0044446//intracellular organelle part;GO:0043231//intracellular…	GO:0004601//peroxidase activity;GO:0005488//binding;GO:0015036//disulfide oxidoreductase activity;GO:0003824//catalytic activity;GO:0016765//transferase activity, transferring alkyl or aryl (other than methyl) groups;GO:0016209//antioxidant activity;GO:0016667//oxidoreductase activity, acting on a sulfur group of donors;GO:0016684//oxidoreductase activity, acting on peroxide as acceptor;GO:001674…	GO:0044237//cellular metabolic process;GO:0009987//cellular process;GO:0008152//metabolic process;GO:0044699//single-organism process;GO:0044710//single-organism metabolic process;GO:0006790//sulfur compound metabolic process
ENSGALG00000029932	LUR1L	PREDICTED: chromosome Z open reading frame, human C9orf150 [Gallus gallus]	-	-	-	-	-	-	-
ENSGALG00000014324	GTR3	solute carrier family 2, facilitated glucose transporter member 3 [Gallus gallus]	-	-	-	-	GO:0031224//intrinsic component of membrane;GO:0044425//membrane part;GO:0016020//membrane	GO:0022857//transmembrane transporter activity;GO:0022891//substrate-specific transmembrane transporter activity;GO:0005215//transporter activity;GO:0015144//carbohydrate transmembrane transporter activity;GO:0051183//vitamin transporter activity;GO:0005355//glucose transmembrane transporter activity;GO:0015149//hexose transmembrane transporter activity;GO:1901476//carbohydrate transporter activi…	GO:0008643//carbohydrate transport;GO:0044238//primary metabolic process;GO:1902578//single-organism localization;GO:0044710//single-organism metabolic process;GO:0044699//single-organism process;GO:0015749//monosaccharide transport;GO:0008152//metabolic process;GO:0051234//establishment of localization;GO:0008645//hexose transport;GO:0006810//transport;GO:0071702//organic substance transport;GO:…
ENSGALG00000008813	OCTC	PREDICTED: peroxisomal carnitine O-octanoyltransferase isoformX2 [Gallus gallus]	Cellular Processes	Transport and catabolism	ko04146//Peroxisome	K05940	GO:0043229//intracellular organelle;GO:0044464//cell part;GO:0044424//intracellular part;GO:0044444//cytoplasmic part;GO:0042579//microbody;GO:0005623//cell;GO:0043227//membrane-bounded organelle;GO:0043226//organelle;GO:0005737//cytoplasm;GO:0005622//intracellular;GO:0043231//intracellular membrane-bounded organelle	GO:0016746//transferase activity, transferring acyl groups;GO:0005488//binding;GO:0016406//carnitine O-acyltransferase activity;GO:0016747//transferase activity, transferring acyl groups other than amino-acyl groups;GO:0016740//transferase activity;GO:0008374//O-acyltransferase activity;GO:0005515//protein binding;GO:0003824//catalytic activity	GO:0044699//single-organism process;GO:0006869//lipid transport;GO:0071704//organic substance metabolic process;GO:0044765//single-organism transport;GO:0071702//organic substance transport;GO:0009062//fatty acid catabolic process;GO:0046395//carboxylic acid catabolic process;GO:0044237//cellular metabolic process;GO:1901575//organic substance catabolic process;GO:0044242//cellular lipid cataboli…
ENSGALG00000000729	PP1R8	nuclear inhibitor of protein phosphatase 1 [Gallus gallus]	-	-	-	-	GO:0044451//nucleoplasm part;GO:0043231//intracellular membrane-bounded organelle;GO:0044446//intracellular organelle part;GO:0044422//organelle part;GO:0005622//intracellular;GO:0043229//intracellular organelle;GO:0044428//nuclear part;GO:0043226//organelle;GO:0044424//intracellular part;GO:0005654//nucleoplasm;GO:0031981//nuclear lumen;GO:0070013//intracellular organelle lumen;GO:0043233//organ…	GO:0019888//protein phosphatase regulator activity;GO:0019208//phosphatase regulator activity;GO:0098772//molecular function regulator;GO:0030234//enzyme regulator activity	GO:0065007//biological regulation;GO:0044699//single-organism process;GO:0019222//regulation of metabolic process;GO:0050789//regulation of biological process
ENSGALG00000006783	PLOD2	PREDICTED: procollagen-lysine,2-oxoglutarate 5-dioxygenase 2 isoform X3 [Gallus gallus]	Metabolism	Amino acid metabolism	ko00310//Lysine degradation	K13645	GO:0043231//intracellular membrane-bounded organelle;GO:0043229//intracellular organelle;GO:0043226//organelle;GO:0044464//cell part;GO:0005622//intracellular;GO:0044424//intracellular part;GO:0043227//membrane-bounded organelle;GO:0005623//cell	GO:0016706//oxidoreductase activity, acting on paired donors, with incorporation or reduction of molecular oxygen, 2-oxoglutarate as one donor, and incorporation of one atom each of oxygen into both donors;GO:0046914//transition metal ion binding;GO:0043169//cation binding;GO:0036094//small molecule binding;GO:0043167//ion binding;GO:0019842//vitamin binding;GO:0016491//oxidoreductase activity;GO…	GO:0050896//response to stimulus;GO:0006950//response to stress;GO:0044699//single-organism process;GO:0044710//single-organism metabolic process;GO:0008152//metabolic process
ENSGALG00000008014	CEBPB	CCAAT/enhancer-binding protein beta [Gallus gallus]	-	-	-	-	GO:0000785//chromatin;GO:0044446//intracellular organelle part;GO:0044427//chromosomal part;GO:0005622//intracellular;GO:0044424//intracellular part;GO:0005694//chromosome;GO:0043226//organelle;GO:0043231//intracellular membrane-bounded organelle;GO:0044464//cell part;GO:0005623//cell;GO:0044422//organelle part;GO:0043229//intracellular organelle;GO:0043228//non-membrane-bounded organelle;GO:0032…	GO:0003677//DNA binding;GO:0003700//transcription factor activity, sequence-specific DNA binding;GO:0001071//nucleic acid binding transcription factor activity;GO:0005488//binding;GO:0046983//protein dimerization activity;GO:0005515//protein binding;GO:0003676//nucleic acid binding;GO:0000981//RNA polymerase II transcription factor activity, sequence-specific DNA binding;GO:0000982//transcription…	GO:0009607//response to biotic stimulus;GO:0042221//response to chemical;GO:0051716//cellular response to stimulus;GO:0009719//response to endogenous stimulus;GO:1901698//response to nitrogen compound;GO:0010941//regulation of cell death;GO:0019438//aromatic compound biosynthetic process;GO:0009059//macromolecule biosynthetic process;GO:0051707//response to other organism;GO:0001503//ossification…
ENSGALG00000021340	CAH9	PREDICTED: carbonic anhydrase 9 isoform X6 [Gallus gallus]	Metabolism	Energy metabolism	ko00910//Nitrogen metabolism	K01672	GO:0016020//membrane	GO:0005488//binding;GO:0043167//ion binding;GO:0003824//catalytic activity;GO:0016835//carbon-oxygen lyase activity;GO:0046914//transition metal ion binding;GO:0016829//lyase activity;GO:0046872//metal ion binding;GO:0016836//hydro-lyase activity;GO:0043169//cation binding	GO:0051234//establishment of localization;GO:0006810//transport;GO:0044237//cellular metabolic process;GO:0009987//cellular process;GO:0044765//single-organism transport;GO:1902578//single-organism localization;GO:0051179//localization;GO:0008152//metabolic process;GO:0044699//single-organism process
ENSGALG00000034306	NDF4	neurogenic differentiation factor 4 [Gallus gallus]	-	-	-	-	GO:0044464//cell part;GO:0043231//intracellular membrane-bounded organelle;GO:0043226//organelle;GO:0005622//intracellular;GO:0005623//cell;GO:0043227//membrane-bounded organelle;GO:0044424//intracellular part;GO:0043229//intracellular organelle	GO:0005488//binding;GO:1901363//heterocyclic compound binding;GO:0097159//organic cyclic compound binding;GO:0003676//nucleic acid binding;GO:0005515//protein binding	GO:0051716//cellular response to stimulus;GO:0048869//cellular developmental process;GO:0007154//cell communication;GO:0007423//sensory organ development;GO:0006807//nitrogen compound metabolic process;GO:0009059//macromolecule biosynthetic process;GO:1901360//organic cyclic compound metabolic process;GO:0044707//single-multicellular organism process;GO:0032502//developmental process;GO:0008152//…
ENSGALG00000002187	DHB4	peroxisomal multifunctional enzyme type 2 [Gallus gallus]	Cellular Processes;Metabolism	Transport and catabolism;Global and Overview;Lipid metabolism	ko01100//Metabolic pathways;ko04146//Peroxisome;ko00120//Primary bile acid biosynthesis	K12405	GO:0005622//intracellular;GO:0043231//intracellular membrane-bounded organelle;GO:0044438//microbody part;GO:0044444//cytoplasmic part;GO:0042579//microbody;GO:0005737//cytoplasm;GO:0044422//organelle part;GO:0043227//membrane-bounded organelle;GO:0043226//organelle;GO:0043229//intracellular organelle;GO:0044464//cell part;GO:0005623//cell;GO:0005777//peroxisome;GO:0044424//intracellular part;GO:…	GO:0016836//hydro-lyase activity;GO:0005496//steroid binding;GO:0016229//steroid dehydrogenase activity;GO:0016829//lyase activity;GO:0016491//oxidoreductase activity;GO:0016616//oxidoreductase activity, acting on the CH-OH group of donors, NAD or NADP as acceptor;GO:0003824//catalytic activity;GO:0008289//lipid binding;GO:0097159//organic cyclic compound binding;GO:0005515//protein binding;GO:00…	GO:0030154//cell differentiation;GO:0044238//primary metabolic process;GO:0009987//cellular process;GO:0030855//epithelial cell differentiation;GO:0044710//single-organism metabolic process;GO:0044699//single-organism process;GO:0035383//thioester metabolic process;GO:0060429//epithelium development;GO:0044242//cellular lipid catabolic process;GO:0006631//fatty acid metabolic process;GO:0019752//…
ENSGALG00000002345	ATG12	PREDICTED: autophagy related 12 isoformX2 [Gallus gallus]	Environmental Information Processing;Organismal Systems;Cellular Processes	Signal transduction;Transport and catabolism;Immune system	ko04068//FoxO signaling pathway;ko04622//RIG-I-like receptor signaling pathway;ko04140//Regulation of autophagy	K08336	GO:0005622//intracellular;GO:0000407//pre-autophagosomal structure;GO:0044444//cytoplasmic part;GO:0005623//cell;GO:0044424//intracellular part;GO:0044464//cell part;GO:0005737//cytoplasm	-	GO:0007033//vacuole organization;GO:0016043//cellular component organization;GO:0006996//organelle organization;GO:0071840//cellular component organization or biogenesis;GO:0009987//cellular process
ENSGALG00000012601	GOLM1	PREDICTED: Golgi membrane protein 1 isoform X3 [Gallus gallus]	-	-	-	-	GO:0043226//organelle;GO:0005623//cell;GO:0043229//intracellular organelle;GO:0043231//intracellular membrane-bounded organelle;GO:0044464//cell part;GO:0044424//intracellular part;GO:0043227//membrane-bounded organelle;GO:0005622//intracellular	-	GO:0008152//metabolic process;GO:0071704//organic substance metabolic process;GO:0044710//single-organism metabolic process;GO:0044238//primary metabolic process;GO:0006629//lipid metabolic process;GO:0016043//cellular component organization;GO:0071840//cellular component organization or biogenesis;GO:0009987//cellular process;GO:0006996//organelle organization;GO:0044699//single-organism process
ENSGALG00000028484	TMED7	PREDICTED: transmembrane emp24 domain-containing protein 7 [Gallus gallus]	-	-	-	-	GO:0016020//membrane;GO:0044425//membrane part;GO:0031224//intrinsic component of membrane	-	GO:0051179//localization;GO:0051234//establishment of localization
ENSGALG00000043618	S40A1	solute carrier family 40 member 1 [Gallus gallus]	-	-	-	-	GO:0030136//clathrin-coated vesicle;GO:0005770//late endosome;GO:0031982//vesicle;GO:0030135//coated vesicle;GO:0044464//cell part;GO:0043226//organelle;GO:0043231//intracellular membrane-bounded organelle;GO:0043229//intracellular organelle;GO:0043227//membrane-bounded organelle;GO:0012505//endomembrane system;GO:0031410//cytoplasmic vesicle;GO:0044425//membrane part;GO:0016023//cytoplasmic, mem…	GO:0046915//transition metal ion transmembrane transporter activity;GO:0022892//substrate-specific transporter activity;GO:0015075//ion transmembrane transporter activity;GO:0046873//metal ion transmembrane transporter activity;GO:0022891//substrate-specific transmembrane transporter activity;GO:0008324//cation transmembrane transporter activity;GO:0022857//transmembrane transporter activity;GO:0…	GO:0002376//immune system process;GO:0042592//homeostatic process;GO:0016265//death;GO:0048871//multicellular organismal homeostasis;GO:0048856//anatomical structure development;GO:0046916//cellular transition metal ion homeostasis;GO:0006915//apoptotic process;GO:0055065//metal ion homeostasis;GO:0000041//transition metal ion transport;GO:0030001//metal ion transport;GO:0032502//developmental pr…
ENSGALG00000015177	GNAQ	guanine nucleotide-binding protein G(q) subunit alpha [Gallus gallus]	Organismal Systems;Environmental Information Processing;Cellular Processes	Endocrine system;Cellular commiunity;Circulatory system;Signal transduction	ko04020//Calcium signaling pathway;ko04261//Adrenergic signaling in cardiomyocytes;ko04270//Vascular smooth muscle contraction;ko04916//Melanogenesis;ko04540//Gap junction;ko04912//GnRH signaling pathway	K04634	-	-	-
ENSGALG00000030506	T2R40	PREDICTED: taste receptor type 2 member 40-like [Gallus gallus]	-	-	-	-	GO:0044425//membrane part;GO:0031224//intrinsic component of membrane;GO:0016020//membrane	GO:0038023//signaling receptor activity;GO:0060089//molecular transducer activity;GO:0099600//transmembrane receptor activity;GO:0004872//receptor activity;GO:0004871//signal transducer activity;GO:0004888//transmembrane signaling receptor activity	GO:0050896//response to stimulus;GO:0065007//biological regulation;GO:0050789//regulation of biological process;GO:0044763//single-organism cellular process;GO:0050877//neurological system process;GO:0009987//cellular process;GO:0044699//single-organism process;GO:0032501//multicellular organismal process;GO:0007166//cell surface receptor signaling pathway;GO:0007606//sensory perception of chemic…
ENSGALG00000027140	MALD2	PREDICTED: MARVEL domain-containing protein 2 [Gallus gallus]	-	-	-	-	GO:0005911//cell-cell junction;GO:0043218//compact myelin;GO:0005623//cell;GO:0043296//apical junction complex;GO:0031224//intrinsic component of membrane;GO:0016020//membrane;GO:0044464//cell part;GO:0043209//myelin sheath;GO:0030054//cell junction;GO:0044425//membrane part	-	GO:0016043//cellular component organization;GO:0044699//single-organism process;GO:0050877//neurological system process;GO:0003008//system process;GO:0044763//single-organism cellular process;GO:0007600//sensory perception;GO:0009987//cellular process;GO:0050954//sensory perception of mechanical stimulus;GO:0071840//cellular component organization or biogenesis;GO:0032501//multicellular organisma…
ENSGALG00000005065	PA24A	cytosolic phospholipase A2 [Gallus gallus]	Metabolism;Environmental Information Processing;Organismal Systems	Signal transduction;Circulatory system;Lipid metabolism;Global and Overview;Endocrine system	ko01100//Metabolic pathways;ko01110//Biosynthesis of secondary metabolites;ko04010//MAPK signaling pathway;ko04270//Vascular smooth muscle contraction;ko00564//Glycerophospholipid metabolism;ko04912//GnRH signaling pathway;ko04370//VEGF signaling pathway;ko00590//Arachidonic acid metabolism;ko00565//Ether lipid metabolism;ko00591//Linoleic acid metabolism;ko00592//alpha-Linolenic acid metabolism	K16342	GO:0005622//intracellular;GO:0044444//cytoplasmic part;GO:0043226//organelle;GO:0043231//intracellular membrane-bounded organelle;GO:0043229//intracellular organelle;GO:0043227//membrane-bounded organelle;GO:0044464//cell part;GO:0005737//cytoplasm;GO:0044424//intracellular part;GO:0005623//cell	GO:0046872//metal ion binding;GO:0005543//phospholipid binding;GO:0004620//phospholipase activity;GO:0052689//carboxylic ester hydrolase activity;GO:0043169//cation binding;GO:0043167//ion binding;GO:0016787//hydrolase activity;GO:0016298//lipase activity;GO:0005488//binding;GO:0008289//lipid binding;GO:0003824//catalytic activity;GO:0043168//anion binding;GO:0004623//phospholipase A2 activity;GO…	GO:0033036//macromolecule localization;GO:0006811//ion transport;GO:0015908//fatty acid transport;GO:0006644//phospholipid metabolic process;GO:0043436//oxoacid metabolic process;GO:0015849//organic acid transport;GO:0046942//carboxylic acid transport;GO:1901568//fatty acid derivative metabolic process;GO:0015909//long-chain fatty acid transport;GO:0046677//response to antibiotic;GO:0071704//orga…
ENSGALG00000014252	A2ML1	PREDICTED: alpha-2-macroglobulin-like protein 1-like isoform X5 [Gallus gallus]	-	-	-	-	-	-	-
ENSGALG00000003733	LIFR	leukemia inhibitory factor receptor precursor [Gallus gallus]	Environmental Information Processing	Signaling molecules and interaction;Signal transduction	ko04060//Cytokine-cytokine receptor interaction;ko04630//Jak-STAT signaling pathway	K05058	-	GO:0005102//receptor binding;GO:0005515//protein binding;GO:0099600//transmembrane receptor activity;GO:0004896//cytokine receptor activity;GO:0005488//binding;GO:0005126//cytokine receptor binding;GO:0004872//receptor activity;GO:0004871//signal transducer activity;GO:0004888//transmembrane signaling receptor activity;GO:0060089//molecular transducer activity;GO:0038023//signaling receptor activ…	GO:0044700//single organism signaling;GO:0007165//signal transduction;GO:0051716//cellular response to stimulus;GO:0050789//regulation of biological process;GO:0050896//response to stimulus;GO:0008283//cell proliferation;GO:0050794//regulation of cellular process;GO:0044699//single-organism process;GO:0023052//signaling;GO:0007166//cell surface receptor signaling pathway;GO:0044763//single-organi…
ENSGALG00000015097	CNTLN	PREDICTED: centlein isoform X2 [Gallus gallus]	-	-	-	-	-	-	-
ENSGALG00000042257	MYH3	PREDICTED: myosin-3 [Gallus gallus]	Cellular Processes	Cellular commiunity	ko04530//Tight junction	K10352	GO:0044464//cell part;GO:0005623//cell;GO:0043229//intracellular organelle;GO:0043228//non-membrane-bounded organelle;GO:0005622//intracellular;GO:0005856//cytoskeleton;GO:0044424//intracellular part;GO:0043232//intracellular non-membrane-bounded organelle;GO:0015629//actin cytoskeleton;GO:0043226//organelle	GO:0036094//small molecule binding;GO:0097367//carbohydrate derivative binding;GO:0001882//nucleoside binding;GO:0016817//hydrolase activity, acting on acid anhydrides;GO:0032550//purine ribonucleoside binding;GO:0017111//nucleoside-triphosphatase activity;GO:0097159//organic cyclic compound binding;GO:0001883//purine nucleoside binding;GO:0016818//hydrolase activity, acting on acid anhydrides, i…	-
ENSGALG00000036054	NIPLB	PREDICTED: nucleolar protein 58-like [Chaetura pelagica]	-	-	-	-	-	-	-
ENSGALG00000031707	DHH	PREDICTED: desert hedgehog protein, partial [Meleagris gallopavo]	Environmental Information Processing	Signal transduction	ko04340//Hedgehog signaling pathway	K11990	GO:0016020//membrane	GO:0005515//protein binding;GO:0005102//receptor binding;GO:0003824//catalytic activity;GO:0046914//transition metal ion binding;GO:0046872//metal ion binding;GO:0005488//binding;GO:0043167//ion binding;GO:0016787//hydrolase activity;GO:0043169//cation binding	GO:0044763//single-organism cellular process;GO:0007281//germ cell development;GO:0050896//response to stimulus;GO:0006629//lipid metabolic process;GO:0007165//signal transduction;GO:0032501//multicellular organismal process;GO:0048856//anatomical structure development;GO:0043170//macromolecule metabolic process;GO:0044238//primary metabolic process;GO:0030908//protein splicing;GO:0019953//sexual…
ENSGALG00000002529	MCCB	PREDICTED: methylcrotonoyl-CoA carboxylase beta chain, mitochondrial [Gallus gallus]	Metabolism	Global and Overview;Amino acid metabolism	ko01100//Metabolic pathways;ko00280//Valine, leucine and isoleucine degradation	K01969	-	GO:0003824//catalytic activity	-
ENSGALG00000028142	HACD4	PREDICTED: very-long-chain (3R)-3-hydroxyacyl-[acyl-carrier protein] dehydratase 4 [Gallus gallus]	Metabolism	Lipid metabolism;Global and Overview	ko01110//Biosynthesis of secondary metabolites;ko01212//Fatty acid metabolism;ko01040//Biosynthesis of unsaturated fatty acids;ko00062//Fatty acid elongation	K10703	-	-	-
ENSGALG00000005229	DPH5	PREDICTED: diphthine synthase isoform X2 [Gallus gallus]	-	-	-	-	-	GO:0003824//catalytic activity;GO:0008168//methyltransferase activity;GO:0008757//S-adenosylmethionine-dependent methyltransferase activity;GO:0016740//transferase activity;GO:0016741//transferase activity, transferring one-carbon groups	GO:0071704//organic substance metabolic process;GO:0036211//protein modification process;GO:0044267//cellular protein metabolic process;GO:0044237//cellular metabolic process;GO:0018193//peptidyl-amino acid modification;GO:0009987//cellular process;GO:0017182//peptidyl-diphthamide metabolic process;GO:0044260//cellular macromolecule metabolic process;GO:0043170//macromolecule metabolic process;GO…
ENSGALG00000045383	--	PREDICTED: hornerin-like [Anas platyrhynchos]	-	-	-	-	-	-	-
ENSGALG00000013493	SPTC1	PREDICTED: serine palmitoyltransferase 1 isoform X1 [Gallus gallus]	Metabolism	Global and Overview;Lipid metabolism	ko01100//Metabolic pathways;ko00600//Sphingolipid metabolism	K00654	GO:0044432//endoplasmic reticulum part;GO:0044446//intracellular organelle part;GO:0031090//organelle membrane;GO:0098796//membrane protein complex;GO:0044464//cell part;GO:0044424//intracellular part;GO:0032991//macromolecular complex;GO:0005789//endoplasmic reticulum membrane;GO:0005623//cell;GO:0016020//membrane;GO:0043234//protein complex;GO:0098588//bounding membrane of organelle;GO:0005622/…	GO:0016740//transferase activity;GO:0003824//catalytic activity;GO:0016746//transferase activity, transferring acyl groups;GO:0043167//ion binding;GO:0016747//transferase activity, transferring acyl groups other than amino-acyl groups;GO:0016409//palmitoyltransferase activity;GO:0043168//anion binding;GO:0005488//binding;GO:0016454//C-palmitoyltransferase activity;GO:0016408//C-acyltransferase ac…	GO:0044763//single-organism cellular process;GO:0006807//nitrogen compound metabolic process;GO:0006066//alcohol metabolic process;GO:0044106//cellular amine metabolic process;GO:0044699//single-organism process;GO:0006796//phosphate-containing compound metabolic process;GO:0071704//organic substance metabolic process;GO:0006665//sphingolipid metabolic process;GO:0006629//lipid metabolic process;…
ENSGALG00000007082	CREM	cAMP-responsive element modulator isoform 2 [Gallus gallus]	Organismal Systems	Circulatory system	ko04261//Adrenergic signaling in cardiomyocytes	K09052	GO:0043226//organelle;GO:0044464//cell part;GO:0032991//macromolecular complex;GO:0043234//protein complex;GO:0043231//intracellular membrane-bounded organelle;GO:0044424//intracellular part;GO:0005623//cell;GO:0043229//intracellular organelle;GO:0005622//intracellular;GO:0043227//membrane-bounded organelle	GO:1901363//heterocyclic compound binding;GO:0005488//binding;GO:0001071//nucleic acid binding transcription factor activity;GO:0003676//nucleic acid binding;GO:0097159//organic cyclic compound binding;GO:0003677//DNA binding	GO:0016070//RNA metabolic process;GO:0044699//single-organism process;GO:0071704//organic substance metabolic process;GO:0032774//RNA biosynthetic process;GO:0046483//heterocycle metabolic process;GO:0034641//cellular nitrogen compound metabolic process;GO:0044271//cellular nitrogen compound biosynthetic process;GO:0008152//metabolic process;GO:0006643//membrane lipid metabolic process;GO:0044763…
ENSGALG00000005347	ATS18	PREDICTED: A disintegrin and metalloproteinase with thrombospondin motifs 18 isoform X2 [Gallus gallus]	-	-	-	-	GO:0031012//extracellular matrix	GO:0003824//catalytic activity;GO:0008233//peptidase activity;GO:0004175//endopeptidase activity;GO:0043167//ion binding;GO:0046872//metal ion binding;GO:0005488//binding;GO:0016787//hydrolase activity;GO:0046914//transition metal ion binding;GO:0070011//peptidase activity, acting on L-amino acid peptides;GO:0043169//cation binding	-
ENSGALG00000013197	GLT12	PREDICTED: polypeptide N-acetylgalactosaminyltransferase 12 [Gallus gallus]	Metabolism	Glycan biosynthesis and metabolism;Global and Overview	ko01100//Metabolic pathways;ko00512//Mucin type O-glycan biosynthesis	K00710	GO:0044425//membrane part;GO:0005622//intracellular;GO:0044424//intracellular part;GO:0044464//cell part;GO:0043229//intracellular organelle;GO:0005623//cell;GO:0031224//intrinsic component of membrane;GO:0043226//organelle;GO:0043231//intracellular membrane-bounded organelle;GO:0043227//membrane-bounded organelle;GO:0016020//membrane	GO:0005488//binding;GO:0003824//catalytic activity;GO:0043167//ion binding;GO:0043169//cation binding;GO:0016740//transferase activity	GO:0071704//organic substance metabolic process;GO:0019538//protein metabolic process;GO:0006464//cellular protein modification process;GO:0043412//macromolecule modification;GO:0044260//cellular macromolecule metabolic process;GO:0044237//cellular metabolic process;GO:0008152//metabolic process;GO:0009987//cellular process;GO:0044267//cellular protein metabolic process;GO:0036211//protein modifi…
ENSGALG00000020884	PGFS	PREDICTED: LOW QUALITY PROTEIN: uncharacterized oxidoreductase ZK1290.5-like [Gallus gallus]	-	-	-	-	-	-	-
ENSGALG00000035230	CSMD1	PREDICTED: CUB and sushi domain-containing protein 1 [Charadrius vociferus]	-	-	-	-	-	-	-
ENSGALG00000002358	CDO1	PREDICTED: cysteine dioxygenase type 1 [Gallus gallus]	Metabolism	Amino acid metabolism;Metabolism of other amino acids;Global and Overview	ko01100//Metabolic pathways;ko00270//Cysteine and methionine metabolism;ko00430//Taurine and hypotaurine metabolism	K00456	GO:0005737//cytoplasm;GO:0005622//intracellular;GO:0044464//cell part;GO:0005623//cell;GO:0044444//cytoplasmic part;GO:0044424//intracellular part	GO:0046914//transition metal ion binding;GO:0043169//cation binding;GO:0016702//oxidoreductase activity, acting on single donors with incorporation of molecular oxygen, incorporation of two atoms of oxygen;GO:0043167//ion binding;GO:0046872//metal ion binding;GO:0016701//oxidoreductase activity, acting on single donors with incorporation of molecular oxygen;GO:0016491//oxidoreductase activity;GO:…	GO:0000096//sulfur amino acid metabolic process;GO:0071704//organic substance metabolic process;GO:0006520//cellular amino acid metabolic process;GO:0006790//sulfur compound metabolic process;GO:0006082//organic acid metabolic process;GO:0044237//cellular metabolic process;GO:1901564//organonitrogen compound metabolic process;GO:0044763//single-organism cellular process;GO:0009987//cellular proce…
ENSGALG00000041666	ASND1	asparagine synthetase domain-containing protein 1 [Gallus gallus]	-	-	-	-	-	GO:0016884//carbon-nitrogen ligase activity, with glutamine as amido-N-donor;GO:0016879//ligase activity, forming carbon-nitrogen bonds;GO:0003824//catalytic activity;GO:0016874//ligase activity	GO:0006807//nitrogen compound metabolic process;GO:0043603//cellular amide metabolic process;GO:0044237//cellular metabolic process;GO:0043436//oxoacid metabolic process;GO:0009064//glutamine family amino acid metabolic process;GO:0044710//single-organism metabolic process;GO:0009066//aspartate family amino acid metabolic process;GO:0006528//asparagine metabolic process;GO:0044281//small molecule…
ENSGALG00000012607	TUT7	terminal uridylyltransferase 7 [Gallus gallus]	-	-	-	-	-	GO:0016740//transferase activity;GO:0043169//cation binding;GO:0016772//transferase activity, transferring phosphorus-containing groups;GO:0016779//nucleotidyltransferase activity;GO:0046914//transition metal ion binding;GO:0043167//ion binding;GO:0070569//uridylyltransferase activity;GO:0005488//binding;GO:0097159//organic cyclic compound binding;GO:0003824//catalytic activity;GO:0046872//metal …	GO:0008152//metabolic process;GO:0071704//organic substance metabolic process;GO:0043170//macromolecule metabolic process;GO:0016070//RNA metabolic process;GO:1901360//organic cyclic compound metabolic process;GO:0034641//cellular nitrogen compound metabolic process;GO:0010467//gene expression;GO:0009987//cellular process;GO:0044238//primary metabolic process;GO:0006807//nitrogen compound metabol…
ENSGALG00000026594	HS3S5	PREDICTED: heparan sulfate glucosamine 3-O-sulfotransferase 5 isoform X6 [Gallus gallus]	Metabolism	Glycan biosynthesis and metabolism	ko00534//Glycosaminoglycan biosynthesis - heparan sulfate / heparin	K08104	-	GO:0003824//catalytic activity;GO:0016782//transferase activity, transferring sulfur-containing groups;GO:0008146//sulfotransferase activity;GO:0034483//heparan sulfate sulfotransferase activity;GO:0016740//transferase activity	GO:0008152//metabolic process;GO:0009101//glycoprotein biosynthetic process;GO:0044699//single-organism process;GO:0044710//single-organism metabolic process;GO:0044272//sulfur compound biosynthetic process;GO:0044711//single-organism biosynthetic process;GO:0006790//sulfur compound metabolic process;GO:0052126//movement in host environment;GO:0032501//multicellular organismal process;GO:0051828/…
ENSGALG00000015155	CARME	PREDICTED: UPF0586 protein C9orf41 [Gallus gallus]	-	-	-	-	-	-	-
ENSGALG00000046634	SPAG4	PREDICTED: sperm-associated antigen 4 protein-like isoform X1 [Gallus gallus]	-	-	-	-	-	-	-
ENSGALG00000044541	ADCYA	PREDICTED: adenylate cyclase type 10-like [Gallus gallus]	Metabolism	Nucleotide metabolism	ko00230//Purine metabolism	K11265	-	GO:0003824//catalytic activity;GO:0016829//lyase activity	GO:0007165//signal transduction;GO:0009987//cellular process;GO:0065007//biological regulation;GO:0007154//cell communication;GO:0050794//regulation of cellular process;GO:0044699//single-organism process;GO:0044700//single organism signaling;GO:0044763//single-organism cellular process;GO:0050789//regulation of biological process;GO:0023052//signaling;GO:0050896//response to stimulus;GO:0051716/…
ENSGALG00000033635	PGH2	prostaglandin G/H synthase 2 isoform 1 precursor [Gallus gallus]	Environmental Information Processing;Metabolism	Lipid metabolism;Global and Overview;Signal transduction	ko01100//Metabolic pathways;ko04370//VEGF signaling pathway;ko00590//Arachidonic acid metabolism	K11987	GO:0005622//intracellular;GO:0043227//membrane-bounded organelle;GO:0016020//membrane;GO:0044424//intracellular part;GO:0043231//intracellular membrane-bounded organelle;GO:0043229//intracellular organelle;GO:0042175//nuclear outer membrane-endoplasmic reticulum membrane network;GO:0043226//organelle;GO:0044464//cell part;GO:0042995//cell projection;GO:0012505//endomembrane system;GO:0005623//cell	GO:0043167//ion binding;GO:0016209//antioxidant activity;GO:0003824//catalytic activity;GO:0005488//binding;GO:0016705//oxidoreductase activity, acting on paired donors, with incorporation or reduction of molecular oxygen;GO:0043169//cation binding;GO:0016491//oxidoreductase activity;GO:0005515//protein binding;GO:0097159//organic cyclic compound binding;GO:0046983//protein dimerization activity;…	GO:0006692//prostanoid metabolic process;GO:0006950//response to stress;GO:0006693//prostaglandin metabolic process;GO:0046457//prostanoid biosynthetic process;GO:0009628//response to abiotic stimulus;GO:0045597//positive regulation of cell differentiation;GO:0042303//molting cycle;GO:0002526//acute inflammatory response;GO:0048522//positive regulation of cellular process;GO:0071704//organic subs…
ENSGALG00000041619	MTPN	myotrophin [Gallus gallus]	-	-	-	-	GO:0005856//cytoskeleton;GO:0043227//membrane-bounded organelle;GO:0043005//neuron projection;GO:0044464//cell part;GO:0005622//intracellular;GO:0005623//cell;GO:0015629//actin cytoskeleton;GO:0043229//intracellular organelle;GO:0005737//cytoplasm;GO:0043226//organelle;GO:0043231//intracellular membrane-bounded organelle;GO:0044444//cytoplasmic part;GO:0043228//non-membrane-bounded organelle;GO:0…	-	GO:1901615//organic hydroxy compound metabolic process;GO:0030154//cell differentiation;GO:0008152//metabolic process;GO:0051171//regulation of nitrogen compound metabolic process;GO:0009893//positive regulation of metabolic process;GO:2001141//regulation of RNA biosynthetic process;GO:0010604//positive regulation of macromolecule metabolic process;GO:0014896//muscle hypertrophy;GO:0019219//regul…
ENSGALG00000000720	GBP1	PREDICTED: interferon-induced guanylate-binding protein 1 [Gallus gallus]	-	-	-	-	-	-	-
ENSGALG00000046115	ADCYA	PREDICTED: adenylate cyclase type 10-like isoform X5 [Gallus gallus]	Metabolism	Nucleotide metabolism	ko00230//Purine metabolism	K11265	-	GO:0003824//catalytic activity;GO:0016829//lyase activity	GO:0051716//cellular response to stimulus;GO:0050794//regulation of cellular process;GO:0050896//response to stimulus;GO:0023052//signaling;GO:0044763//single-organism cellular process;GO:0044699//single-organism process;GO:0009987//cellular process;GO:0044700//single organism signaling;GO:0007165//signal transduction;GO:0007154//cell communication;GO:0065007//biological regulation;GO:0050789//re…
ENSGALG00000012613	F16P1	fructose-1,6-bisphosphatase 1 [Gallus gallus]	Metabolism;Organismal Systems	Global and Overview;Carbohydrate metabolism;Endocrine system	ko01100//Metabolic pathways;ko01110//Biosynthesis of secondary metabolites;ko01130//Biosynthesis of antibiotics;ko01120//Microbial metabolism in diverse environments;ko04910//Insulin signaling pathway;ko01200//Carbon metabolism;ko00010//Glycolysis / Gluconeogenesis;ko00051//Fructose and mannose metabolism;ko00030//Pentose phosphate pathway	K03841	-	GO:0003824//catalytic activity;GO:0032550//purine ribonucleoside binding;GO:0097159//organic cyclic compound binding;GO:0043169//cation binding;GO:0001883//purine nucleoside binding;GO:0050308//sugar-phosphatase activity;GO:0016791//phosphatase activity;GO:0043167//ion binding;GO:0019203//carbohydrate phosphatase activity;GO:1901363//heterocyclic compound binding;GO:0036094//small molecule bindin…	GO:0051259//protein oligomerization;GO:0010038//response to metal ion;GO:0023052//signaling;GO:0019693//ribose phosphate metabolic process;GO:0046496//nicotinamide nucleotide metabolic process;GO:1901657//glycosyl compound metabolic process;GO:0032026//response to magnesium ion;GO:0050789//regulation of biological process;GO:0007265//Ras protein signal transduction;GO:0009179//purine ribonucleosi…
ENSGALG00000002294	SEM6A	PREDICTED: semaphorin-6A isoformX1 [Gallus gallus]	-	-	-	-	GO:0031224//intrinsic component of membrane;GO:0044425//membrane part;GO:0016021//integral component of membrane;GO:0016020//membrane	GO:0004872//receptor activity;GO:0005488//binding;GO:0004871//signal transducer activity;GO:0060089//molecular transducer activity;GO:0038023//signaling receptor activity;GO:0005515//protein binding;GO:0005102//receptor binding	GO:0007165//signal transduction;GO:0065007//biological regulation;GO:0050789//regulation of biological process;GO:0030335//positive regulation of cell migration;GO:0051640//organelle localization;GO:0048522//positive regulation of cellular process;GO:0051272//positive regulation of cellular component movement;GO:2000145//regulation of cell motility;GO:0030334//regulation of cell migration;GO:0044…
ENSGALG00000031112	CO5A2	PREDICTED: collagen alpha-2(V) chain isoform X2 [Gallus gallus]	-	-	-	-	GO:0005583//fibrillar collagen trimer;GO:0098643//banded collagen fibril;GO:0031012//extracellular matrix;GO:0005576//extracellular region;GO:0043234//protein complex;GO:0098644//complex of collagen trimers;GO:0005581//collagen trimer;GO:0044420//extracellular matrix component;GO:0032991//macromolecular complex;GO:0005578//proteinaceous extracellular matrix;GO:0044421//extracellular region part	GO:0005515//protein binding;GO:0005488//binding	GO:0009719//response to endogenous stimulus;GO:0044767//single-organism developmental process;GO:0001654//eye development;GO:0050896//response to stimulus;GO:0044707//single-multicellular organism process;GO:0043200//response to amino acid;GO:0044763//single-organism cellular process;GO:0048856//anatomical structure development;GO:0010033//response to organic substance;GO:1901700//response to oxy…
ENSGALG00000041764	VTM2A	PREDICTED: V-set and transmembrane domain-containing protein 2A isoform X22 [Gallus gallus]	-	-	-	-	-	-	-
ENSGALG00000007095	CUL2	PREDICTED: cullin-2 isoform X1 [Anas platyrhynchos]	Genetic Information Processing	Folding, sorting and degradation	ko04120//Ubiquitin mediated proteolysis	K03870	GO:0005622//intracellular;GO:0000151//ubiquitin ligase complex;GO:1902494//catalytic complex;GO:0043234//protein complex;GO:0032991//macromolecular complex;GO:0005623//cell;GO:1990234//transferase complex;GO:0044424//intracellular part;GO:0044464//cell part	GO:0005515//protein binding;GO:0044389//ubiquitin-like protein ligase binding;GO:0005488//binding;GO:0019899//enzyme binding	-
ENSGALG00000027785	CCBE1	PREDICTED: collagen and calcium-binding EGF domain-containing protein 1 isoform X1 [Gallus gallus]	-	-	-	-	-	GO:0005488//binding;GO:0005515//protein binding	GO:0032879//regulation of localization;GO:0040012//regulation of locomotion;GO:0065007//biological regulation;GO:0050794//regulation of cellular process;GO:0051239//regulation of multicellular organismal process;GO:0030334//regulation of cell migration;GO:0051270//regulation of cellular component movement;GO:0010594//regulation of endothelial cell migration;GO:0050789//regulation of biological pr…
ENSGALG00000015577	F151B	PREDICTED: protein FAM151B-like [Gallus gallus]	-	-	-	-	-	-	-
ENSGALG00000025842	TPM2	PREDICTED: tropomyosin beta chain isoform X5 [Haliaeetus leucocephalus]	Organismal Systems	Circulatory system	ko04261//Adrenergic signaling in cardiomyocytes;ko04260//Cardiac muscle contraction	K10374	-	-	-
ENSGALG00000005329	HIAT1	PREDICTED: hippocampus abundant transcript 1 protein [Melopsittacus undulatus]	-	-	-	-	GO:0016020//membrane;GO:0031224//intrinsic component of membrane;GO:0044425//membrane part	-	GO:0051179//localization;GO:0009987//cellular process;GO:0044699//single-organism process;GO:0044763//single-organism cellular process;GO:0051234//establishment of localization
ENSGALG00000015598	RGRF2	PREDICTED: ras-specific guanine nucleotide-releasing factor 2 isoform X1 [Gallus gallus]	Environmental Information Processing	Signal transduction	ko04010//MAPK signaling pathway	K12326	GO:0044424//intracellular part;GO:0005623//cell;GO:0005622//intracellular;GO:0044464//cell part	GO:0098772//molecular function regulator;GO:0005088//Ras guanyl-nucleotide exchange factor activity;GO:0005085//guanyl-nucleotide exchange factor activity	GO:0044763//single-organism cellular process;GO:0050896//response to stimulus;GO:0044700//single organism signaling;GO:0050794//regulation of cellular process;GO:0044699//single-organism process;GO:0007154//cell communication;GO:0050789//regulation of biological process;GO:0065007//biological regulation;GO:0023052//signaling;GO:0009987//cellular process;GO:0007165//signal transduction;GO:0051716/…
ENSGALG00000014724	GPBP1	PREDICTED: vasculin isoform 1 [Gallus gallus]	-	-	-	-	GO:0005623//cell;GO:0043231//intracellular membrane-bounded organelle;GO:0043229//intracellular organelle;GO:0005622//intracellular;GO:0043226//organelle;GO:0044464//cell part;GO:0043227//membrane-bounded organelle;GO:0044424//intracellular part	GO:0005488//binding;GO:1901363//heterocyclic compound binding;GO:0003676//nucleic acid binding;GO:0001071//nucleic acid binding transcription factor activity;GO:0097159//organic cyclic compound binding	GO:1901360//organic cyclic compound metabolic process;GO:0009058//biosynthetic process;GO:0009059//macromolecule biosynthetic process;GO:0097659//nucleic acid-templated transcription;GO:0032774//RNA biosynthetic process;GO:0034645//cellular macromolecule biosynthetic process;GO:0046483//heterocycle metabolic process;GO:0044271//cellular nitrogen compound biosynthetic process;GO:1901362//organic c…
ENSGALG00000032030	EGFLA	PREDICTED: pikachurin isoform X3 [Gallus gallus]	-	-	-	-	GO:0005576//extracellular region;GO:0031012//extracellular matrix;GO:0005578//proteinaceous extracellular matrix;GO:0044421//extracellular region part	GO:0005488//binding;GO:0097367//carbohydrate derivative binding	GO:0071840//cellular component organization or biogenesis;GO:0018149//peptide cross-linking;GO:0030155//regulation of cell adhesion;GO:0050789//regulation of biological process;GO:0043062//extracellular structure organization;GO:0019538//protein metabolic process;GO:0036211//protein modification process;GO:0044260//cellular macromolecule metabolic process;GO:0044237//cellular metabolic process;GO…
ENSGALG00000013427	SRBS2	PREDICTED: sorbin and SH3 domain-containing protein 2 isoform X18 [Gallus gallus]	-	-	-	-	-	GO:0005515//protein binding;GO:0005488//binding	-
ENSGALG00000037162	NS1BP	PREDICTED: influenza virus NS1A-binding protein homolog isoform X4 [Gallus gallus]	Human Diseases	Infectious diseases	ko05164//Influenza A	K15046	-	-	-
ENSGALG00000041343	AMPO	PREDICTED: aminopeptidase O isoform X4 [Gallus gallus]	-	-	-	-	GO:0044422//organelle part;GO:0044464//cell part;GO:0043229//intracellular organelle;GO:0005634//nucleus;GO:0005623//cell;GO:0031974//membrane-enclosed lumen;GO:0043233//organelle lumen;GO:0005622//intracellular;GO:0043226//organelle;GO:0043231//intracellular membrane-bounded organelle;GO:0044446//intracellular organelle part;GO:0070013//intracellular organelle lumen;GO:0031981//nuclear lumen;GO:…	GO:0008233//peptidase activity;GO:0046914//transition metal ion binding;GO:0043169//cation binding;GO:0046872//metal ion binding;GO:0003824//catalytic activity;GO:0043167//ion binding;GO:0070011//peptidase activity, acting on L-amino acid peptides;GO:0008238//exopeptidase activity;GO:0005488//binding;GO:0016787//hydrolase activity	GO:0044237//cellular metabolic process;GO:0008610//lipid biosynthetic process;GO:0044238//primary metabolic process;GO:0006636//unsaturated fatty acid biosynthetic process;GO:0016053//organic acid biosynthetic process;GO:0044283//small molecule biosynthetic process;GO:0072330//monocarboxylic acid biosynthetic process;GO:0033559//unsaturated fatty acid metabolic process;GO:0008152//metabolic proce…
ENSGALG00000017447	OSTF1	osteoclast-stimulating factor 1 [Gallus gallus]	-	-	-	-	GO:0005623//cell;GO:0005622//intracellular;GO:0044424//intracellular part;GO:0044464//cell part	GO:0005515//protein binding;GO:0019904//protein domain specific binding;GO:0005488//binding	-
ENSGALG00000031129	HMCN1	PREDICTED: LOW QUALITY PROTEIN: hemicentin-1 [Gallus gallus]	-	-	-	-	-	-	-
ENSGALG00000012598	NAA35	N-alpha-acetyltransferase 35, NatC auxiliary subunit [Gallus gallus]	-	-	-	-	GO:1990904//ribonucleoprotein complex;GO:0016020//membrane;GO:0044444//cytoplasmic part;GO:1990234//transferase complex;GO:0005622//intracellular;GO:1902493//acetyltransferase complex;GO:0044424//intracellular part;GO:0031414//N-terminal protein acetyltransferase complex;GO:0031248//protein acetyltransferase complex;GO:0043234//protein complex;GO:0030529//intracellular ribonucleoprotein complex;G…	-	GO:0006915//apoptotic process;GO:0044699//single-organism process;GO:0044763//single-organism cellular process;GO:0008219//cell death;GO:0008283//cell proliferation;GO:0033002//muscle cell proliferation;GO:0016265//death;GO:0009987//cellular process;GO:0012501//programmed cell death
ENSGALG00000014746	TRPV6	PREDICTED: transient receptor potential cation channel subfamily V member 6 isoform X3 [Gallus gallus]	-	-	-	-	GO:0031224//intrinsic component of membrane;GO:0016020//membrane;GO:0044425//membrane part	GO:0022857//transmembrane transporter activity;GO:0022891//substrate-specific transmembrane transporter activity;GO:0022838//substrate-specific channel activity;GO:0005261//cation channel activity;GO:0015267//channel activity;GO:0005215//transporter activity;GO:0008324//cation transmembrane transporter activity;GO:0005216//ion channel activity;GO:0022892//substrate-specific transporter activity;G…	-
ENSGALG00000034492	PCLO	PREDICTED: protein piccolo-like [Pelecanus crispus]	-	-	-	-	-	GO:0005515//protein binding;GO:0005543//phospholipid binding;GO:0046872//metal ion binding;GO:0005488//binding;GO:0008289//lipid binding;GO:0043168//anion binding;GO:0043167//ion binding;GO:0043169//cation binding	GO:0044699//single-organism process;GO:0002790//peptide secretion;GO:0046879//hormone secretion;GO:0030072//peptide hormone secretion;GO:0071702//organic substance transport;GO:0042886//amide transport;GO:0071840//cellular component organization or biogenesis;GO:0016192//vesicle-mediated transport;GO:0044763//single-organism cellular process;GO:0046903//secretion;GO:0019935//cyclic-nucleotide-med…
ENSGALG00000026058	--	APC membrane recruitment protein 1, partial [Chaetura pelagica]	-	-	-	-	-	-	-
ENSGALG00000010187	EAA3	PREDICTED: excitatory amino acid transporter 3 [Gallus gallus]	-	-	-	-	GO:0016020//membrane	GO:0005416//cation:amino acid symporter activity;GO:0005283//sodium:amino acid symporter activity;GO:0022891//substrate-specific transmembrane transporter activity;GO:0022857//transmembrane transporter activity;GO:0022892//substrate-specific transporter activity;GO:0022804//active transmembrane transporter activity;GO:0015293//symporter activity;GO:0008514//organic anion transmembrane transporter…	GO:0015807//L-amino acid transport;GO:0071840//cellular component organization or biogenesis;GO:0015849//organic acid transport;GO:0051259//protein oligomerization;GO:0065003//macromolecular complex assembly;GO:0006820//anion transport;GO:0006461//protein complex assembly;GO:0051179//localization;GO:0015800//acidic amino acid transport;GO:0006835//dicarboxylic acid transport;GO:0015813//L-glutama…
ENSGALG00000005277	RTCA	PREDICTED: RNA 3'-terminal phosphate cyclase [Gallus gallus]	-	-	-	-	-	GO:0009975//cyclase activity;GO:0097159//organic cyclic compound binding;GO:0001883//purine nucleoside binding;GO:0097367//carbohydrate derivative binding;GO:0032549//ribonucleoside binding;GO:0032550//purine ribonucleoside binding;GO:0005488//binding;GO:0003824//catalytic activity;GO:0001882//nucleoside binding;GO:1901363//heterocyclic compound binding;GO:0036094//small molecule binding	GO:0008152//metabolic process;GO:0043170//macromolecule metabolic process;GO:0071704//organic substance metabolic process;GO:0010467//gene expression
ENSGALG00000009168	AFF2	PREDICTED: AF4/FMR2 family member 2 [Gallus gallus]	-	-	-	-	-	-	-
ENSGALG00000034395	NUDT7	peroxisomal coenzyme A diphosphatase NUDT7 [Gallus gallus]	Cellular Processes	Transport and catabolism	ko04146//Peroxisome	K17879	GO:0042579//microbody;GO:0005622//intracellular;GO:0044444//cytoplasmic part;GO:0043231//intracellular membrane-bounded organelle;GO:0005623//cell;GO:0043226//organelle;GO:0043227//membrane-bounded organelle;GO:0005737//cytoplasm;GO:0044424//intracellular part;GO:0044464//cell part;GO:0043229//intracellular organelle	GO:0097159//organic cyclic compound binding;GO:0046872//metal ion binding;GO:0003676//nucleic acid binding;GO:0005488//binding;GO:1901363//heterocyclic compound binding;GO:0016289//CoA hydrolase activity;GO:0003824//catalytic activity;GO:0003723//RNA binding;GO:0016788//hydrolase activity, acting on ester bonds;GO:0016817//hydrolase activity, acting on acid anhydrides;GO:0043167//ion binding;GO:0…	GO:0044237//cellular metabolic process;GO:0044699//single-organism process;GO:0055086//nucleobase-containing small molecule metabolic process;GO:0051187//cofactor catabolic process;GO:0030154//cell differentiation;GO:0044281//small molecule metabolic process;GO:0006732//coenzyme metabolic process;GO:0019637//organophosphate metabolic process;GO:0044248//cellular catabolic process;GO:0044763//sing…
ENSGALG00000005280	ODB2	lipoamide acyltransferase component of branched-chain alpha-keto acid dehydrogenase complex, mitochondrial precursor [Gallus gallus]	Metabolism	Carbohydrate metabolism;Global and Overview;Amino acid metabolism	ko01100//Metabolic pathways;ko01110//Biosynthesis of secondary metabolites;ko01130//Biosynthesis of antibiotics;ko00280//Valine, leucine and isoleucine degradation;ko00640//Propanoate metabolism	K09699	GO:0044446//intracellular organelle part;GO:0005623//cell;GO:0043232//intracellular non-membrane-bounded organelle;GO:0005622//intracellular;GO:0044422//organelle part;GO:0043229//intracellular organelle;GO:0044464//cell part;GO:0005856//cytoskeleton;GO:0043231//intracellular membrane-bounded organelle;GO:0043227//membrane-bounded organelle;GO:0044424//intracellular part;GO:0031974//membrane-encl…	GO:0016740//transferase activity;GO:0003824//catalytic activity	-
ENSGALG00000017291	FACR1	PREDICTED: fatty acyl-CoA reductase 1 isoform X3 [Gallus gallus]	Cellular Processes	Transport and catabolism	ko04146//Peroxisome	K13356	-	-	-
ENSGALG00000014516	CPEB2	PREDICTED: cytoplasmic polyadenylation element-binding protein 2 isoform X3 [Chrysemys picta bellii]	Cellular Processes;Organismal Systems	Cell growth and death;Endocrine system;Development	ko04114//Oocyte meiosis;ko04914//Progesterone-mediated oocyte maturation;ko04320//Dorso-ventral axis formation	K02602	GO:0005623//cell;GO:0043227//membrane-bounded organelle;GO:0044424//intracellular part;GO:1990904//ribonucleoprotein complex;GO:0030529//intracellular ribonucleoprotein complex;GO:0043226//organelle;GO:0043229//intracellular organelle;GO:0005622//intracellular;GO:0044464//cell part;GO:0043231//intracellular membrane-bounded organelle;GO:0032991//macromolecular complex	GO:0005488//binding;GO:1901363//heterocyclic compound binding;GO:0044877//macromolecular complex binding;GO:0098772//molecular function regulator;GO:0043021//ribonucleoprotein complex binding;GO:0003730//mRNA 3'-UTR binding;GO:0036094//small molecule binding;GO:0003723//RNA binding;GO:0030234//enzyme regulator activity;GO:0003727//single-stranded RNA binding;GO:0003729//mRNA binding;GO:0045182//t…	GO:0006979//response to oxidative stress;GO:0043087//regulation of GTPase activity;GO:0010629//negative regulation of gene expression;GO:0009892//negative regulation of metabolic process;GO:0065007//biological regulation;GO:0009628//response to abiotic stimulus;GO:0043434//response to peptide hormone;GO:0050789//regulation of biological process;GO:0032269//negative regulation of cellular protein …
ENSGALG00000016224	AOFA	PREDICTED: amine oxidase [flavin-containing] A-like [Meleagris gallopavo]	Metabolism	Xenobiotics biodegradation and metabolism;Amino acid metabolism;Global and Overview	ko01100//Metabolic pathways;ko01110//Biosynthesis of secondary metabolites;ko00330//Arginine and proline metabolism;ko00380//Tryptophan metabolism;ko00260//Glycine, serine and threonine metabolism;ko00982//Drug metabolism - cytochrome P450;ko00350//Tyrosine metabolism;ko00340//Histidine metabolism;ko00360//Phenylalanine metabolism	K00274	GO:0005623//cell;GO:0043229//intracellular organelle;GO:0044464//cell part;GO:0043226//organelle;GO:0043231//intracellular membrane-bounded organelle;GO:0044424//intracellular part;GO:0005622//intracellular;GO:0043227//membrane-bounded organelle	GO:0003824//catalytic activity	GO:1901564//organonitrogen compound metabolic process;GO:0018958//phenol-containing compound metabolic process;GO:0006725//cellular aromatic compound metabolic process;GO:0097164//ammonium ion metabolic process;GO:0006584//catecholamine metabolic process;GO:0071704//organic substance metabolic process;GO:1901615//organic hydroxy compound metabolic process;GO:0009987//cellular process;GO:0044237//…
ENSGALG00000045555	NS1BP	PREDICTED: influenza virus NS1A-binding protein homolog isoform X4 [Gallus gallus]	Human Diseases	Infectious diseases	ko05164//Influenza A	K15046	-	-	GO:0050794//regulation of cellular process;GO:0010648//negative regulation of cell communication;GO:0009966//regulation of signal transduction;GO:0023051//regulation of signaling;GO:1902532//negative regulation of intracellular signal transduction;GO:0065007//biological regulation;GO:0048523//negative regulation of cellular process;GO:0048519//negative regulation of biological process;GO:1902531/…
ENSGALG00000044172	ADCYA	PREDICTED: adenylate cyclase type 10-like isoform X4 [Gallus gallus]	Metabolism	Nucleotide metabolism	ko00230//Purine metabolism	K11265	-	GO:0003824//catalytic activity;GO:0016829//lyase activity	GO:0050789//regulation of biological process;GO:0044699//single-organism process;GO:0023052//signaling;GO:0007165//signal transduction;GO:0065007//biological regulation;GO:0051716//cellular response to stimulus;GO:0044700//single organism signaling;GO:0050794//regulation of cellular process;GO:0044763//single-organism cellular process;GO:0050896//response to stimulus;GO:0009987//cellular process;…
ENSGALG00000002599	ARG39	vav-like protein C9orf100 homolog [Gallus gallus]	-	-	-	-	GO:0016020//membrane	GO:0005088//Ras guanyl-nucleotide exchange factor activity;GO:0098772//molecular function regulator;GO:0005085//guanyl-nucleotide exchange factor activity	GO:0016477//cell migration;GO:0040011//locomotion;GO:0044699//single-organism process;GO:0006928//movement of cell or subcellular component;GO:0044763//single-organism cellular process;GO:0051179//localization;GO:0048870//cell motility;GO:0009987//cellular process;GO:0051674//localization of cell
ENSGALG00000012577	FRMD3	PREDICTED: FERM domain-containing protein 3 isoform X5 [Gallus gallus]	-	-	-	-	GO:0043229//intracellular organelle;GO:0005622//intracellular;GO:0044424//intracellular part;GO:0043226//organelle;GO:0005623//cell;GO:0016020//membrane;GO:0044425//membrane part;GO:0043228//non-membrane-bounded organelle;GO:0044464//cell part;GO:0043232//intracellular non-membrane-bounded organelle	GO:0005515//protein binding;GO:0005488//binding	-
ENSGALG00000005361	HPRT	PREDICTED: hypoxanthine-guanine phosphoribosyltransferase-like [Gallus gallus]	Metabolism	Xenobiotics biodegradation and metabolism;Global and Overview;Nucleotide metabolism	ko01100//Metabolic pathways;ko01110//Biosynthesis of secondary metabolites;ko00230//Purine metabolism;ko00983//Drug metabolism - other enzymes	K00760	GO:0044424//intracellular part;GO:0005623//cell;GO:0044464//cell part;GO:0005622//intracellular	GO:0003824//catalytic activity	GO:0006807//nitrogen compound metabolic process;GO:0034654//nucleobase-containing compound biosynthetic process;GO:1901362//organic cyclic compound biosynthetic process;GO:0044271//cellular nitrogen compound biosynthetic process;GO:0043101//purine-containing compound salvage;GO:1901576//organic substance biosynthetic process;GO:0043094//cellular metabolic compound salvage;GO:1901564//organonitrog…
ENSGALG00000014736	KELL	PREDICTED: kell blood group glycoprotein homolog isoform X2 [Gallus gallus]	-	-	-	-	-	GO:0003824//catalytic activity;GO:0016787//hydrolase activity;GO:0070011//peptidase activity, acting on L-amino acid peptides;GO:0008233//peptidase activity;GO:0004175//endopeptidase activity	GO:0006508//proteolysis;GO:0071704//organic substance metabolic process;GO:0010467//gene expression;GO:0051604//protein maturation;GO:0044238//primary metabolic process;GO:0043170//macromolecule metabolic process;GO:0019538//protein metabolic process;GO:0016485//protein processing;GO:0008152//metabolic process
ENSGALG00000015164	PCSK5	PREDICTED: proprotein convertase subtilisin/kexin type 5-like [Gallus gallus]	-	-	-	-	-	-	-
ENSGALG00000016902	GPC5	PREDICTED: glypican-5 isoform X37 [Gallus gallus]	-	-	-	-	GO:0031224//intrinsic component of membrane;GO:0016020//membrane;GO:0031012//extracellular matrix;GO:0044425//membrane part	GO:0043168//anion binding;GO:0043167//ion binding;GO:0005488//binding	-
ENSGALG00000040796	AMPO	PREDICTED: aminopeptidase O isoform X4 [Gallus gallus]	-	-	-	-	GO:0044428//nuclear part;GO:0044422//organelle part;GO:0005622//intracellular;GO:0044446//intracellular organelle part;GO:0043231//intracellular membrane-bounded organelle;GO:0043226//organelle;GO:0070013//intracellular organelle lumen;GO:0031981//nuclear lumen;GO:0031974//membrane-enclosed lumen;GO:0043227//membrane-bounded organelle;GO:0043229//intracellular organelle;GO:0005623//cell;GO:004446…	GO:0005488//binding;GO:0070011//peptidase activity, acting on L-amino acid peptides;GO:0046914//transition metal ion binding;GO:0003824//catalytic activity;GO:0008238//exopeptidase activity;GO:0043167//ion binding;GO:0016787//hydrolase activity;GO:0008233//peptidase activity;GO:0043169//cation binding;GO:0046872//metal ion binding	GO:0006633//fatty acid biosynthetic process;GO:0009058//biosynthetic process;GO:0044238//primary metabolic process;GO:0033559//unsaturated fatty acid metabolic process;GO:0019752//carboxylic acid metabolic process;GO:0046394//carboxylic acid biosynthetic process;GO:0006631//fatty acid metabolic process;GO:0044763//single-organism cellular process;GO:0006082//organic acid metabolic process;GO:0008…
ENSGALG00000033525	CCBE1	PREDICTED: collagen and calcium-binding EGF domain-containing protein 1 isoform X2 [Gallus gallus]	-	-	-	-	-	GO:0043167//ion binding;GO:0005515//protein binding;GO:0043169//cation binding;GO:0005488//binding;GO:0046872//metal ion binding	GO:0010632//regulation of epithelial cell migration;GO:0050794//regulation of cellular process;GO:2000145//regulation of cell motility;GO:0032879//regulation of localization;GO:0065007//biological regulation;GO:0010594//regulation of endothelial cell migration;GO:0040012//regulation of locomotion;GO:0050789//regulation of biological process;GO:0051270//regulation of cellular component movement;GO…
ENSGALG00000032066	GPR98	PREDICTED: G-protein coupled receptor 98, partial [Anas platyrhynchos]	-	-	-	-	GO:0044425//membrane part;GO:0005622//intracellular;GO:0031224//intrinsic component of membrane;GO:0005623//cell;GO:0044424//intracellular part;GO:0044464//cell part;GO:0016020//membrane	GO:0004871//signal transducer activity;GO:0005488//binding;GO:0008092//cytoskeletal protein binding;GO:0004888//transmembrane signaling receptor activity;GO:0060089//molecular transducer activity;GO:0038023//signaling receptor activity;GO:0099600//transmembrane receptor activity;GO:0004872//receptor activity;GO:0005515//protein binding;GO:0046872//metal ion binding;GO:0043169//cation binding;GO:0…	GO:0007600//sensory perception;GO:0044707//single-multicellular organism process;GO:0050793//regulation of developmental process;GO:0032501//multicellular organismal process;GO:0042592//homeostatic process;GO:0050953//sensory perception of light stimulus;GO:0001894//tissue homeostasis;GO:0044763//single-organism cellular process;GO:0048523//negative regulation of cellular process;GO:0045596//nega…
ENSGALG00000027761	TFIP8	PREDICTED: tumor necrosis factor alpha-induced protein 8 isoform X1 [Meleagris gallopavo]	-	-	-	-	GO:0044464//cell part;GO:0005623//cell;GO:0005622//intracellular;GO:0044424//intracellular part	GO:0030234//enzyme regulator activity;GO:0061134//peptidase regulator activity;GO:0030414//peptidase inhibitor activity;GO:0004869//cysteine-type endopeptidase inhibitor activity;GO:0004857//enzyme inhibitor activity;GO:0061135//endopeptidase regulator activity;GO:0098772//molecular function regulator;GO:0004866//endopeptidase inhibitor activity	GO:0044763//single-organism cellular process;GO:0008219//cell death;GO:0009987//cellular process;GO:0044699//single-organism process;GO:0012501//programmed cell death;GO:0006915//apoptotic process;GO:0016265//death
ENSGALG00000005248	CC14A	dual specificity protein phosphatase CDC14A [Gallus gallus]	Cellular Processes	Cell growth and death	ko04110//Cell cycle	K06639	GO:0044446//intracellular organelle part;GO:0005623//cell;GO:0044464//cell part;GO:0043229//intracellular organelle;GO:0043227//membrane-bounded organelle;GO:0005856//cytoskeleton;GO:0044422//organelle part;GO:0043231//intracellular membrane-bounded organelle;GO:0043228//non-membrane-bounded organelle;GO:0005815//microtubule organizing center;GO:0044430//cytoskeletal part;GO:0043226//organelle;GO…	GO:0016787//hydrolase activity;GO:0004721//phosphoprotein phosphatase activity;GO:0016791//phosphatase activity;GO:0003824//catalytic activity;GO:0016788//hydrolase activity, acting on ester bonds;GO:0042578//phosphoric ester hydrolase activity	-
ENSGALG00000037015	DACH1	dachshund homolog 1 [Gallus gallus]	-	-	-	-	GO:0043229//intracellular organelle;GO:0044422//organelle part;GO:0043226//organelle;GO:0044446//intracellular organelle part;GO:0043227//membrane-bounded organelle;GO:0043231//intracellular membrane-bounded organelle;GO:0032991//macromolecular complex;GO:0044424//intracellular part;GO:0043234//protein complex;GO:0070013//intracellular organelle lumen;GO:0031981//nuclear lumen;GO:0031974//membran…	GO:0000983//transcription factor activity, RNA polymerase II core promoter sequence-specific;GO:0005488//binding;GO:0097159//organic cyclic compound binding;GO:0003676//nucleic acid binding;GO:1901363//heterocyclic compound binding;GO:0000982//transcription factor activity, RNA polymerase II core promoter proximal region sequence-specific binding;GO:0003700//transcription factor activity, sequenc…	GO:0060255//regulation of macromolecule metabolic process;GO:0018130//heterocycle biosynthetic process;GO:0051252//regulation of RNA metabolic process;GO:0016070//RNA metabolic process;GO:0022414//reproductive process;GO:0080090//regulation of primary metabolic process;GO:0045934//negative regulation of nucleobase-containing compound metabolic process;GO:0032774//RNA biosynthetic process;GO:00104…
ENSGALG00000045237	WDR75	PREDICTED: WD repeat-containing protein 75 [Gallus gallus]	Genetic Information Processing	Translation	ko03008//Ribosome biogenesis in eukaryotes	K14552	GO:0043229//intracellular organelle;GO:0044424//intracellular part;GO:0005622//intracellular;GO:0043231//intracellular membrane-bounded organelle;GO:0043226//organelle;GO:0005623//cell;GO:0043227//membrane-bounded organelle;GO:0044464//cell part	-	-
ENSGALG00000012941	CAD12	PREDICTED: cadherin-12 isoform X10 [Gallus gallus]	-	-	-	-	GO:0016020//membrane;GO:0044425//membrane part;GO:0031224//intrinsic component of membrane	GO:0043169//cation binding;GO:0005488//binding;GO:0046872//metal ion binding;GO:0043167//ion binding	GO:0007155//cell adhesion;GO:0022610//biological adhesion;GO:0098609//cell-cell adhesion
ENSGALG00000037656	NECP1	PREDICTED: adaptin ear-binding coat-associated protein 1 [Gallus gallus]	-	-	-	-	GO:0030117//membrane coat;GO:0030118//clathrin coat;GO:0044464//cell part;GO:0043234//protein complex;GO:0032991//macromolecular complex;GO:0044424//intracellular part;GO:0005622//intracellular;GO:0005737//cytoplasm;GO:0048475//coated membrane;GO:0012505//endomembrane system;GO:0016020//membrane;GO:0044425//membrane part;GO:0044444//cytoplasmic part;GO:0005623//cell;GO:0098796//membrane protein c…	-	GO:0016192//vesicle-mediated transport;GO:0051234//establishment of localization;GO:0051179//localization;GO:0006810//transport
ENSGALG00000005302	SAS6	spindle assembly abnormal protein 6 homolog [Gallus gallus]	-	-	-	-	GO:0015630//microtubule cytoskeleton;GO:0044464//cell part;GO:0044424//intracellular part;GO:0043232//intracellular non-membrane-bounded organelle;GO:0005815//microtubule organizing center;GO:0043226//organelle;GO:0044430//cytoskeletal part;GO:0005856//cytoskeleton;GO:0005813//centrosome;GO:0044422//organelle part;GO:0005623//cell;GO:0005622//intracellular;GO:0043229//intracellular organelle;GO:0…	-	GO:0044763//single-organism cellular process;GO:0009987//cellular process;GO:0007049//cell cycle;GO:0022402//cell cycle process;GO:0044699//single-organism process
ENSGALG00000031971	CNTP2	PREDICTED: contactin-associated protein-like 2 isoform X1 [Meleagris gallopavo]	Environmental Information Processing	Signaling molecules and interaction	ko04514//Cell adhesion molecules (CAMs)	K07380	GO:0044425//membrane part;GO:0031224//intrinsic component of membrane;GO:0016020//membrane	-	GO:0022610//biological adhesion
ENSGALG00000008954	RUN3B	RUN domain-containing protein 3B [Gallus gallus]	-	-	-	-	-	-	-
ENSGALG00000036598	K1644	KIAA1644 [Homo sapiens]	-	-	-	-	-	-	-
ENSGALG00000000777	EYA3	eyes absent homolog 3 [Gallus gallus]	-	-	-	-	-	-	-
ENSGALG00000014773	LAP2	PREDICTED: protein LAP2 isoform X3 [Gallus gallus]	Organismal Systems	Immune system	ko04621//NOD-like receptor signaling pathway	K12796	-	-	-
ENSGALG00000026757	DYR	dihydrofolate reductase [Gallus gallus]	Metabolism	Global and Overview;Metabolism of cofactors and vitamins	ko01100//Metabolic pathways;ko00670//One carbon pool by folate;ko00790//Folate biosynthesis	K00287	-	GO:0003723//RNA binding;GO:0044822//poly(A) RNA binding;GO:0016645//oxidoreductase activity, acting on the CH-NH group of donors;GO:0097159//organic cyclic compound binding;GO:0036094//small molecule binding;GO:1901363//heterocyclic compound binding;GO:0003676//nucleic acid binding;GO:0005488//binding;GO:0003824//catalytic activity;GO:0016646//oxidoreductase activity, acting on the CH-NH group of…	GO:0044237//cellular metabolic process;GO:0051186//cofactor metabolic process;GO:1901362//organic cyclic compound biosynthetic process;GO:0071704//organic substance metabolic process;GO:1901576//organic substance biosynthetic process;GO:0043604//amide biosynthetic process;GO:0046394//carboxylic acid biosynthetic process;GO:0009108//coenzyme biosynthetic process;GO:1901360//organic cyclic compound…
ENSGALG00000030769	SRBS2	PREDICTED: sorbin and SH3 domain-containing protein 2 isoform X17 [Gallus gallus]	-	-	-	-	-	GO:0005515//protein binding;GO:0005488//binding	-
ENSGALG00000012606	ISCA1	iron-sulfur cluster assembly 1 homolog, mitochondrial [Gallus gallus]	-	-	-	-	GO:0043227//membrane-bounded organelle;GO:0043231//intracellular membrane-bounded organelle;GO:0044424//intracellular part;GO:0044464//cell part;GO:0005622//intracellular;GO:0043226//organelle;GO:0005623//cell;GO:0043229//intracellular organelle	GO:0043167//ion binding;GO:0043169//cation binding;GO:0005488//binding;GO:0051540//metal cluster binding	GO:0008152//metabolic process;GO:0009058//biosynthetic process
ENSGALG00000045443	--	-	-	-	-	-	-	-	-
ENSGALG00000022787	MRO2B	PREDICTED: maestro heat-like repeat-containing protein family member 2B-like [Gallus gallus]	-	-	-	-	-	-	-
ENSGALG00000000737	ASM3B	acid sphingomyelinase-like phosphodiesterase 3b precursor [Gallus gallus]	-	-	-	-	GO:0005576//extracellular region;GO:0044421//extracellular region part	GO:0016298//lipase activity;GO:0016787//hydrolase activity;GO:0016788//hydrolase activity, acting on ester bonds;GO:0004620//phospholipase activity;GO:0003824//catalytic activity	GO:0006643//membrane lipid metabolic process;GO:0044255//cellular lipid metabolic process;GO:0043603//cellular amide metabolic process;GO:0071704//organic substance metabolic process;GO:1901564//organonitrogen compound metabolic process;GO:0097164//ammonium ion metabolic process;GO:0006644//phospholipid metabolic process;GO:0006066//alcohol metabolic process;GO:0006684//sphingomyelin metabolic pr…
ENSGALG00000026906	TM189	transmembrane protein 189 [Gallus gallus]	-	-	-	-	-	GO:0003824//catalytic activity;GO:0016874//ligase activity;GO:0016879//ligase activity, forming carbon-nitrogen bonds	-
ENSGALG00000015148	ANX12	annexin A1 [Gallus gallus]	-	-	-	-	GO:0031988//membrane-bounded vesicle;GO:0043229//intracellular organelle;GO:0044464//cell part;GO:0016020//membrane;GO:0031982//vesicle;GO:0043226//organelle;GO:0042995//cell projection;GO:0005623//cell;GO:0071944//cell periphery;GO:0043227//membrane-bounded organelle;GO:0043231//intracellular membrane-bounded organelle;GO:0005886//plasma membrane;GO:0005622//intracellular;GO:0044424//intracellul…	GO:0046872//metal ion binding;GO:0043168//anion binding;GO:0098772//molecular function regulator;GO:0030234//enzyme regulator activity;GO:0005543//phospholipid binding;GO:0008289//lipid binding;GO:0005515//protein binding;GO:0004859//phospholipase inhibitor activity;GO:0005488//binding;GO:0055102//lipase inhibitor activity;GO:0043169//cation binding;GO:0004857//enzyme inhibitor activity;GO:004316…	GO:0061024//membrane organization;GO:0007275//multicellular organism development;GO:0042592//homeostatic process;GO:0006820//anion transport;GO:0050794//regulation of cellular process;GO:0048513//animal organ development;GO:0050789//regulation of biological process;GO:0007154//cell communication;GO:0016265//death;GO:0046942//carboxylic acid transport;GO:0044267//cellular protein metabolic process…
ENSGALG00000015062	IFNA2	PREDICTED: interferon kappa-like isoform X1 [Gallus gallus]	Organismal Systems;Environmental Information Processing;Cellular Processes;Human Diseases	Signaling molecules and interaction;Signal transduction;Infectious diseases;Transport and catabolism;Immune system	ko04060//Cytokine-cytokine receptor interaction;ko05168//Herpes simplex infection;ko05164//Influenza A;ko04630//Jak-STAT signaling pathway;ko04620//Toll-like receptor signaling pathway;ko04622//RIG-I-like receptor signaling pathway;ko04623//Cytosolic DNA-sensing pathway;ko04140//Regulation of autophagy	K05414	-	-	-
ENSGALG00000031586	HTR5A	PREDICTED: HEAT repeat-containing protein 5A isoformX2 [Gallus gallus]	-	-	-	-	-	-	-
ENSGALG00000006805	PLS2	PREDICTED: phospholipid scramblase 1 isoform 1 [Gallus gallus]	-	-	-	-	-	-	-
ENSGALG00000015589	MSH3	PREDICTED: DNA mismatch repair protein Msh3 isoform X1 [Gallus gallus]	Genetic Information Processing	Replication and repair	ko03430//Mismatch repair	K08736	GO:0043234//protein complex;GO:0005623//cell;GO:0044464//cell part;GO:0032991//macromolecular complex;GO:0044424//intracellular part;GO:0005622//intracellular;GO:1990391//DNA repair complex;GO:0032300//mismatch repair complex	GO:0005488//binding;GO:0097367//carbohydrate derivative binding;GO:0003684//damaged DNA binding;GO:0097159//organic cyclic compound binding;GO:0001882//nucleoside binding;GO:0005515//protein binding;GO:1901363//heterocyclic compound binding;GO:0032549//ribonucleoside binding;GO:0032550//purine ribonucleoside binding;GO:0003690//double-stranded DNA binding;GO:0003677//DNA binding;GO:0032356//oxidi…	GO:0002200//somatic diversification of immune receptors;GO:0060255//regulation of macromolecule metabolic process;GO:0002520//immune system development;GO:0033554//cellular response to stress;GO:0016444//somatic cell DNA recombination;GO:0006725//cellular aromatic compound metabolic process;GO:0006950//response to stress;GO:0006996//organelle organization;GO:0048731//system development;GO:0034641…
ENSGALG00000012610	CATL1	cathepsin L1 precursor [Gallus gallus]	Cellular Processes	Transport and catabolism	ko04145//Phagosome;ko04142//Lysosome	K01365	-	GO:0016787//hydrolase activity;GO:0008233//peptidase activity;GO:0070011//peptidase activity, acting on L-amino acid peptides;GO:0003824//catalytic activity	-
ENSGALG00000027323	MYH3	RecName: Full=Myosin-3; AltName: Full=Myosin heavy chain 3; AltName: Full=Myosin heavy chain, fast skeletal muscle, embryonic [Gallus gallus]	Cellular Processes	Cellular commiunity	ko04530//Tight junction	K10352	GO:0032991//macromolecular complex;GO:0043228//non-membrane-bounded organelle;GO:0043234//protein complex;GO:0043232//intracellular non-membrane-bounded organelle;GO:0044464//cell part;GO:0044424//intracellular part;GO:0044422//organelle part;GO:0005856//cytoskeleton;GO:0043292//contractile fiber;GO:0005737//cytoplasm;GO:0043229//intracellular organelle;GO:0043226//organelle;GO:0015629//actin cyt…	GO:0036094//small molecule binding;GO:0097367//carbohydrate derivative binding;GO:0001882//nucleoside binding;GO:0097159//organic cyclic compound binding;GO:0005488//binding;GO:0016787//hydrolase activity;GO:0017111//nucleoside-triphosphatase activity;GO:0016462//pyrophosphatase activity;GO:0032550//purine ribonucleoside binding;GO:0001883//purine nucleoside binding;GO:1901363//heterocyclic compo…	-
ENSGALG00000002430	SMN	survival motor neuron protein [Gallus gallus]	Genetic Information Processing	Translation	ko03013//RNA transport	K13129	GO:0043231//intracellular membrane-bounded organelle;GO:0043227//membrane-bounded organelle;GO:0044464//cell part;GO:0005623//cell;GO:0005622//intracellular;GO:0043229//intracellular organelle;GO:0043226//organelle;GO:0044424//intracellular part	GO:1901363//heterocyclic compound binding;GO:0005488//binding;GO:0003676//nucleic acid binding;GO:0097159//organic cyclic compound binding	GO:0032989//cellular component morphogenesis;GO:0043170//macromolecule metabolic process;GO:0046483//heterocycle metabolic process;GO:0044763//single-organism cellular process;GO:0007275//multicellular organism development;GO:0044767//single-organism developmental process;GO:0009987//cellular process;GO:0007399//nervous system development;GO:0048731//system development;GO:0048699//generation of n…
ENSGALG00000015184	TLE4	transducin-like enhancer protein 4 [Gallus gallus]	-	-	-	-	GO:0044428//nuclear part;GO:0070013//intracellular organelle lumen;GO:0005623//cell;GO:0044464//cell part;GO:0043231//intracellular membrane-bounded organelle;GO:0043229//intracellular organelle;GO:0044424//intracellular part;GO:0031974//membrane-enclosed lumen;GO:0005622//intracellular;GO:0044422//organelle part;GO:0044446//intracellular organelle part;GO:0005634//nucleus;GO:0043233//organelle l…	GO:0003700//transcription factor activity, sequence-specific DNA binding;GO:0005515//protein binding;GO:0003712//transcription cofactor activity;GO:0005488//binding;GO:0000989//transcription factor activity, transcription factor binding;GO:0008134//transcription factor binding;GO:0000988//transcription factor activity, protein binding;GO:0001071//nucleic acid binding transcription factor activity…	GO:0008152//metabolic process;GO:0050794//regulation of cellular process;GO:0006807//nitrogen compound metabolic process;GO:0097659//nucleic acid-templated transcription;GO:1901576//organic substance biosynthetic process;GO:0044699//single-organism process;GO:0019438//aromatic compound biosynthetic process;GO:0009059//macromolecule biosynthetic process;GO:0032774//RNA biosynthetic process;GO:1901…
ENSGALG00000009978	DTD2	PREDICTED: probable D-tyrosyl-tRNA(Tyr) deacylase 2 isoform X1 [Gallus gallus]	-	-	-	-	GO:0005623//cell;GO:0005622//intracellular;GO:0044464//cell part;GO:0044424//intracellular part	GO:0003824//catalytic activity;GO:0016787//hydrolase activity	GO:0044281//small molecule metabolic process;GO:1901605//alpha-amino acid metabolic process;GO:0006807//nitrogen compound metabolic process;GO:0044763//single-organism cellular process;GO:0044238//primary metabolic process;GO:0044237//cellular metabolic process;GO:0009987//cellular process;GO:0006520//cellular amino acid metabolic process;GO:0008152//metabolic process;GO:0043436//oxoacid metaboli…
ENSGALG00000040184	RIMKB	PREDICTED: beta-citryl-glutamate synthase B isoform X3 [Gallus gallus]	Metabolism	Global and Overview;Amino acid metabolism	ko01100//Metabolic pathways;ko00250//Alanine, aspartate and glutamate metabolism	K18310	-	GO:0032550//purine ribonucleoside binding;GO:1901363//heterocyclic compound binding;GO:0001882//nucleoside binding;GO:0001883//purine nucleoside binding;GO:0097159//organic cyclic compound binding;GO:0043167//ion binding;GO:0005488//binding;GO:0043169//cation binding;GO:0032549//ribonucleoside binding;GO:0097367//carbohydrate derivative binding;GO:0036094//small molecule binding	GO:0043170//macromolecule metabolic process;GO:0043412//macromolecule modification;GO:0008152//metabolic process;GO:0044238//primary metabolic process;GO:0071704//organic substance metabolic process;GO:0036211//protein modification process;GO:0019538//protein metabolic process
ENSGALG00000007076	CCNY	PREDICTED: cyclin-Y isoform X2 [Gallus gallus]	-	-	-	-	GO:0005623//cell;GO:0016020//membrane;GO:1990234//transferase complex;GO:0061695//transferase complex, transferring phosphorus-containing groups;GO:0032991//macromolecular complex;GO:1902554//serine/threonine protein kinase complex;GO:0044464//cell part;GO:1902911//protein kinase complex;GO:0043229//intracellular organelle;GO:0043227//membrane-bounded organelle;GO:0005622//intracellular;GO:000030…	GO:0005515//protein binding;GO:0005488//binding;GO:0019900//kinase binding;GO:0019899//enzyme binding;GO:0030234//enzyme regulator activity;GO:0098772//molecular function regulator;GO:0019207//kinase regulator activity;GO:0019887//protein kinase regulator activity	GO:1903047//mitotic cell cycle process;GO:0001932//regulation of protein phosphorylation;GO:0045859//regulation of protein kinase activity;GO:0051726//regulation of cell cycle;GO:0000079//regulation of cyclin-dependent protein serine/threonine kinase activity;GO:0050789//regulation of biological process;GO:0032268//regulation of cellular protein metabolic process;GO:0009966//regulation of signal …
ENSGALG00000000234	E41LA	PREDICTED: erythrocyte membrane protein band 4.1 like 4A isoform X2 [Gallus gallus]	-	-	-	-	GO:0005623//cell;GO:0043228//non-membrane-bounded organelle;GO:0043232//intracellular non-membrane-bounded organelle;GO:0044464//cell part;GO:0043226//organelle;GO:0044424//intracellular part;GO:0005622//intracellular;GO:0043229//intracellular organelle	-	-
ENSGALG00000033077	TRM1L	PREDICTED: TRM1 tRNA methyltransferase 1-like isoform X2 [Gallus gallus]	-	-	-	-	-	GO:0003824//catalytic activity;GO:0008168//methyltransferase activity;GO:0097159//organic cyclic compound binding;GO:0043169//cation binding;GO:0043167//ion binding;GO:1901363//heterocyclic compound binding;GO:0016741//transferase activity, transferring one-carbon groups;GO:0016740//transferase activity;GO:0005488//binding;GO:0008170//N-methyltransferase activity;GO:0003676//nucleic acid binding	GO:0007626//locomotory behavior;GO:0007610//behavior
ENSGALG00000036282	AAKG1	5'-AMP-activated protein kinase gamma-1 non-catalytic subunit variant 1 [Gallus gallus]	Environmental Information Processing;Organismal Systems;Human Diseases	Signal transduction;Endocrine and metabolic diseases;Endocrine system	ko04068//FoxO signaling pathway;ko04910//Insulin signaling pathway;ko04931//Insulin resistance;ko04920//Adipocytokine signaling pathway	K07200	GO:0044464//cell part;GO:0043227//membrane-bounded organelle;GO:0005622//intracellular;GO:0043229//intracellular organelle;GO:0044424//intracellular part;GO:0005623//cell;GO:0043231//intracellular membrane-bounded organelle;GO:0043226//organelle	GO:0097159//organic cyclic compound binding;GO:1901265//nucleoside phosphate binding;GO:0017076//purine nucleotide binding;GO:0036094//small molecule binding;GO:1901363//heterocyclic compound binding;GO:0000166//nucleotide binding;GO:0005488//binding	GO:0044267//cellular protein metabolic process;GO:0006464//cellular protein modification process;GO:0036211//protein modification process;GO:0010467//gene expression;GO:0071704//organic substance metabolic process;GO:0009987//cellular process;GO:0019538//protein metabolic process;GO:0043412//macromolecule modification;GO:0044238//primary metabolic process;GO:0044260//cellular macromolecule metabo…
ENSGALG00000012608	DAPK1	death-associated protein kinase 1 isoform 1 [Gallus gallus]	-	-	-	-	GO:0044464//cell part;GO:0043232//intracellular non-membrane-bounded organelle;GO:0043229//intracellular organelle;GO:0005622//intracellular;GO:0005623//cell;GO:0005856//cytoskeleton;GO:0043226//organelle;GO:0043228//non-membrane-bounded organelle;GO:0044424//intracellular part	GO:0016773//phosphotransferase activity, alcohol group as acceptor;GO:1901363//heterocyclic compound binding;GO:0003824//catalytic activity;GO:0016740//transferase activity;GO:0005488//binding;GO:0032549//ribonucleoside binding;GO:0004672//protein kinase activity;GO:0097159//organic cyclic compound binding;GO:0032550//purine ribonucleoside binding;GO:0001882//nucleoside binding;GO:0016301//kinase…	GO:0019538//protein metabolic process;GO:0006952//defense response;GO:0006796//phosphate-containing compound metabolic process;GO:1902041//regulation of extrinsic apoptotic signaling pathway via death domain receptors;GO:0009059//macromolecule biosynthetic process;GO:2001233//regulation of apoptotic signaling pathway;GO:0065007//biological regulation;GO:0036211//protein modification process;GO:00…
ENSGALG00000027984	EXTL2	PREDICTED: exostoses (multiple)-like 2 isoform X1 [Gallus gallus]	Metabolism	Global and Overview;Glycan biosynthesis and metabolism	ko01100//Metabolic pathways;ko00534//Glycosaminoglycan biosynthesis - heparan sulfate / heparin	K02369	GO:0016020//membrane;GO:0044422//organelle part;GO:0044425//membrane part;GO:0043229//intracellular organelle;GO:0043227//membrane-bounded organelle;GO:0043226//organelle;GO:0005783//endoplasmic reticulum;GO:0044446//intracellular organelle part;GO:0031090//organelle membrane;GO:0044432//endoplasmic reticulum part;GO:0044464//cell part;GO:0042175//nuclear outer membrane-endoplasmic reticulum memb…	GO:0008194//UDP-glycosyltransferase activity;GO:0008375//acetylglucosaminyltransferase activity;GO:0016740//transferase activity;GO:0016757//transferase activity, transferring glycosyl groups;GO:0016758//transferase activity, transferring hexosyl groups;GO:0008376//acetylgalactosaminyltransferase activity;GO:0003824//catalytic activity	GO:1901135//carbohydrate derivative metabolic process;GO:0071704//organic substance metabolic process;GO:0008152//metabolic process;GO:0006040//amino sugar metabolic process
ENSGALG00000013196	ANKS6	PREDICTED: ankyrin repeat and SAM domain-containing protein 6 isoform X4 [Gallus gallus]	-	-	-	-	-	-	-
ENSGALG00000035325	APR	phorbol-12-myristate-13-acetate-induced protein 1 [Gallus gallus]	Cellular Processes	Cell growth and death	ko04115//p53 signaling pathway	K10131	-	-	-
ENSGALG00000037665	LMBRL	PREDICTED: protein LMBR1L [Aquila chrysaetos canadensis]	-	-	-	-	-	-	-
ENSGALG00000015156	NRK1	PREDICTED: nicotinamide riboside kinase 1 isoform X1 [Gallus gallus]	Metabolism	Metabolism of cofactors and vitamins;Global and Overview	ko01100//Metabolic pathways;ko00760//Nicotinate and nicotinamide metabolism	K10524	-	-	-
ENSGALG00000005203	NOE3	PREDICTED: noelin-3 isoformX1 [Gallus gallus]	-	-	-	-	GO:1990351//transporter complex;GO:0044424//intracellular part;GO:0043234//protein complex;GO:0043229//intracellular organelle;GO:0044421//extracellular region part;GO:0098796//membrane protein complex;GO:0005886//plasma membrane;GO:0031224//intrinsic component of membrane;GO:0043235//receptor complex;GO:0005622//intracellular;GO:1902495//transmembrane transporter complex;GO:0043227//membrane-bou…	-	GO:0044763//single-organism cellular process;GO:0048731//system development;GO:0044767//single-organism developmental process;GO:0009887//organ morphogenesis;GO:0090596//sensory organ morphogenesis;GO:0046530//photoreceptor cell differentiation;GO:0001654//eye development;GO:0032502//developmental process;GO:0030154//cell differentiation;GO:0048869//cellular developmental process;GO:0009653//anat…
ENSGALG00000014329	FOXJ2	PREDICTED: forkhead box protein J2 isoform X7 [Gallus gallus]	-	-	-	-	-	-	-
ENSGALG00000032991	PARP8	PREDICTED: poly [ADP-ribose] polymerase 8 isoformX1 [Gallus gallus]	-	-	-	-	GO:0044464//cell part;GO:0005623//cell	GO:0003824//catalytic activity;GO:0016740//transferase activity;GO:0016763//transferase activity, transferring pentosyl groups;GO:0016757//transferase activity, transferring glycosyl groups	-
ENSGALG00000002548	TLN1	talin-1 [Gallus gallus]	Cellular Processes	Cellular commiunity	ko04510//Focal adhesion	K06271	GO:0043232//intracellular non-membrane-bounded organelle;GO:0042995//cell projection;GO:0030055//cell-substrate junction;GO:0031988//membrane-bounded vesicle;GO:0005737//cytoplasm;GO:0070161//anchoring junction;GO:0005815//microtubule organizing center;GO:0030054//cell junction;GO:0044446//intracellular organelle part;GO:0005623//cell;GO:0043229//intracellular organelle;GO:0005622//intracellular;…	GO:0008092//cytoskeletal protein binding;GO:0005515//protein binding;GO:0005488//binding;GO:0005198//structural molecule activity;GO:0019904//protein domain specific binding;GO:0005102//receptor binding	GO:0030029//actin filament-based process;GO:0034330//cell junction organization;GO:0044699//single-organism process;GO:0009987//cellular process;GO:0034329//cell junction assembly;GO:0022607//cellular component assembly;GO:0044763//single-organism cellular process;GO:0006996//organelle organization;GO:0030036//actin cytoskeleton organization;GO:0016043//cellular component organization;GO:1902589/…
ENSGALG00000015071	FOCAD	PREDICTED: focadhesin [Charadrius vociferus]	-	-	-	-	-	-	-
ENSGALG00000005257	VCAM1	PREDICTED: vascular cell adhesion protein 1 isoform X2 [Gallus gallus]	Human Diseases;Environmental Information Processing	Signaling molecules and interaction;Endocrine and metabolic diseases	ko04514//Cell adhesion molecules (CAMs);ko04933//AGE-RAGE signaling pathway in diabetic complications	K06527	GO:0005737//cytoplasm;GO:0043234//protein complex;GO:0044464//cell part;GO:0044444//cytoplasmic part;GO:0005856//cytoskeleton;GO:0043229//intracellular organelle;GO:0005623//cell;GO:0005768//endosome;GO:0016020//membrane;GO:0015629//actin cytoskeleton;GO:0042995//cell projection;GO:0032991//macromolecular complex;GO:0043232//intracellular non-membrane-bounded organelle;GO:0031224//intrinsic compo…	GO:0016641//oxidoreductase activity, acting on the CH-NH2 group of donors, oxygen as acceptor;GO:0016491//oxidoreductase activity;GO:0005515//protein binding;GO:0005488//binding;GO:0005102//receptor binding;GO:0003824//catalytic activity;GO:0016638//oxidoreductase activity, acting on the CH-NH2 group of donors	GO:0044763//single-organism cellular process;GO:0042592//homeostatic process;GO:0071704//organic substance metabolic process;GO:0022406//membrane docking;GO:0070489//T cell aggregation;GO:0046651//lymphocyte proliferation;GO:0042110//T cell activation;GO:0048731//system development;GO:0048568//embryonic organ development;GO:0033500//carbohydrate homeostasis;GO:0048513//animal organ development;GO…
ENSGALG00000040298	TPK1	PREDICTED: thiamin pyrophosphokinase 1 isoform X5 [Gallus gallus]	Metabolism	Global and Overview;Metabolism of cofactors and vitamins	ko01100//Metabolic pathways;ko00730//Thiamine metabolism	K00949	-	-	-
ENSGALG00000014331	FKBP4	peptidyl-prolyl cis-trans isomerase FKBP4 [Gallus gallus]	-	-	-	-	GO:0005623//cell;GO:0044464//cell part;GO:0005622//intracellular;GO:0044424//intracellular part;GO:0043229//intracellular organelle;GO:0043231//intracellular membrane-bounded organelle;GO:0043226//organelle;GO:0043227//membrane-bounded organelle	GO:0036094//small molecule binding;GO:0032550//purine ribonucleoside binding;GO:0005488//binding;GO:0035257//nuclear hormone receptor binding;GO:0097367//carbohydrate derivative binding;GO:0005102//receptor binding;GO:0001883//purine nucleoside binding;GO:0051427//hormone receptor binding;GO:0097159//organic cyclic compound binding;GO:0035258//steroid hormone receptor binding;GO:0005515//protein …	GO:0051179//localization;GO:0009987//cellular process;GO:0010033//response to organic substance;GO:0071495//cellular response to endogenous stimulus;GO:0032870//cellular response to hormone stimulus;GO:0044699//single-organism process;GO:0044767//single-organism developmental process;GO:0007165//signal transduction;GO:0033036//macromolecule localization;GO:0048731//system development;GO:0043401//…
ENSGALG00000015021	TM174	transmembrane protein 174 [Gallus gallus]	-	-	-	-	-	-	-
ENSGALG00000010180	GLIS3	PREDICTED: zinc finger protein GLIS3 isoform X2 [Gallus gallus]	-	-	-	-	GO:0043229//intracellular organelle;GO:0044464//cell part;GO:0005622//intracellular;GO:0044424//intracellular part;GO:0005623//cell;GO:0043231//intracellular membrane-bounded organelle;GO:0043226//organelle;GO:0043227//membrane-bounded organelle	GO:1901363//heterocyclic compound binding;GO:0001071//nucleic acid binding transcription factor activity;GO:0003676//nucleic acid binding;GO:0043169//cation binding;GO:0097159//organic cyclic compound binding;GO:0005488//binding;GO:0043167//ion binding	GO:0097659//nucleic acid-templated transcription;GO:0034645//cellular macromolecule biosynthetic process;GO:0046483//heterocycle metabolic process;GO:0016070//RNA metabolic process;GO:0044237//cellular metabolic process;GO:0044260//cellular macromolecule metabolic process;GO:0009059//macromolecule biosynthetic process;GO:1901576//organic substance biosynthetic process;GO:0034654//nucleobase-conta…
ENSGALG00000033256	PCSK5	PREDICTED: proprotein convertase subtilisin/kexin type 5 [Gallus gallus]	-	-	-	-	-	-	-
ENSGALG00000044064	FCHO2	PREDICTED: FCH domain only protein 2 isoform X4 [Gallus gallus]	-	-	-	-	GO:0043229//intracellular organelle;GO:0005623//cell;GO:0031410//cytoplasmic vesicle;GO:0044464//cell part;GO:0031988//membrane-bounded vesicle;GO:0043227//membrane-bounded organelle;GO:0044424//intracellular part;GO:0012505//endomembrane system;GO:0030135//coated vesicle;GO:0044444//cytoplasmic part;GO:0005622//intracellular;GO:0043226//organelle;GO:0031982//vesicle;GO:0043231//intracellular mem…	GO:0044877//macromolecular complex binding;GO:0005515//protein binding;GO:0032403//protein complex binding;GO:0005488//binding	GO:0061024//membrane organization;GO:0009987//cellular process;GO:0016192//vesicle-mediated transport;GO:0051234//establishment of localization;GO:0006996//organelle organization;GO:0071840//cellular component organization or biogenesis;GO:0006898//receptor-mediated endocytosis;GO:0051179//localization;GO:0006810//transport;GO:0006901//vesicle coating;GO:0006897//endocytosis;GO:0016050//vesicle o…
ENSGALG00000020879	ZNT7	zinc transporter 7 [Gallus gallus]	-	-	-	-	GO:0005622//intracellular;GO:0044424//intracellular part;GO:0016020//membrane;GO:0031224//intrinsic component of membrane;GO:0005737//cytoplasm;GO:0044444//cytoplasmic part;GO:0043226//organelle;GO:0043229//intracellular organelle;GO:0044464//cell part;GO:0005623//cell;GO:0044425//membrane part;GO:0043227//membrane-bounded organelle;GO:0043231//intracellular membrane-bounded organelle	GO:0022892//substrate-specific transporter activity;GO:0022891//substrate-specific transmembrane transporter activity;GO:0015075//ion transmembrane transporter activity;GO:0022857//transmembrane transporter activity;GO:0005215//transporter activity	GO:0006873//cellular ion homeostasis;GO:0050801//ion homeostasis;GO:0055069//zinc ion homeostasis;GO:0044699//single-organism process;GO:0055076//transition metal ion homeostasis;GO:0006811//ion transport;GO:0065008//regulation of biological quality;GO:1902578//single-organism localization;GO:0044763//single-organism cellular process;GO:0072503//cellular divalent inorganic cation homeostasis;GO:0…

## Sheet: c
Table S6c-The putative locus and candidate genes of WHCY（NG vs. WHCY)
GeneID	Symbol	Description	KEGG_A_class	KEGG_B_class	Pathway	K_ID	GO Component	GO Function	GO Process
ENSGALG00000026594	HS3S5	PREDICTED: heparan sulfate glucosamine 3-O-sulfotransferase 5 isoform X6 [Gallus gallus]	Metabolism	Glycan biosynthesis and metabolism	ko00534//Glycosaminoglycan biosynthesis - heparan sulfate / heparin	K08104	-	GO:0003824//catalytic activity;GO:0016782//transferase activity, transferring sulfur-containing groups;GO:0008146//sulfotransferase activity;GO:0034483//heparan sulfate sulfotransferase activity;GO:0016740//transferase activity	GO:0008152//metabolic process;GO:0009101//glycoprotein biosynthetic process;GO:0044699//single-organism process;GO:0044710//single-organism metabolic process;GO:0044272//sulfur compound biosynthetic process;GO:0044711//single-organism biosynthetic process;GO:0006790//sulfur compound metabolic process;GO:0052126//movement in host environment;GO:0032501//multicellular organismal process;GO:0051828/…
ENSGALG00000015589	MSH3	PREDICTED: DNA mismatch repair protein Msh3 isoform X1 [Gallus gallus]	Genetic Information Processing	Replication and repair	ko03430//Mismatch repair	K08736	GO:0043234//protein complex;GO:0005623//cell;GO:0044464//cell part;GO:0032991//macromolecular complex;GO:0044424//intracellular part;GO:0005622//intracellular;GO:1990391//DNA repair complex;GO:0032300//mismatch repair complex	GO:0005488//binding;GO:0097367//carbohydrate derivative binding;GO:0003684//damaged DNA binding;GO:0097159//organic cyclic compound binding;GO:0001882//nucleoside binding;GO:0005515//protein binding;GO:1901363//heterocyclic compound binding;GO:0032549//ribonucleoside binding;GO:0032550//purine ribonucleoside binding;GO:0003690//double-stranded DNA binding;GO:0003677//DNA binding;GO:0032356//oxidi…	GO:0002200//somatic diversification of immune receptors;GO:0060255//regulation of macromolecule metabolic process;GO:0002520//immune system development;GO:0033554//cellular response to stress;GO:0016444//somatic cell DNA recombination;GO:0006725//cellular aromatic compound metabolic process;GO:0006950//response to stress;GO:0006996//organelle organization;GO:0048731//system development;GO:0034641…
ENSGALG00000035734	IKZF4	PREDICTED: zinc finger protein Eos isoform X2 [Aquila chrysaetos canadensis]	-	-	-	-	-	GO:0097159//organic cyclic compound binding;GO:0043167//ion binding;GO:0005488//binding;GO:0043169//cation binding	-
ENSGALG00000013245	IFNA1	interferon type A1/A2 precursor [Gallus gallus]	Human Diseases;Cellular Processes;Environmental Information Processing;Organismal Systems	Signal transduction;Signaling molecules and interaction;Infectious diseases;Transport and catabolism;Immune system	ko04060//Cytokine-cytokine receptor interaction;ko05168//Herpes simplex infection;ko05164//Influenza A;ko04630//Jak-STAT signaling pathway;ko04620//Toll-like receptor signaling pathway;ko04622//RIG-I-like receptor signaling pathway;ko04623//Cytosolic DNA-sensing pathway;ko04140//Regulation of autophagy	K05414	-	-	-
ENSGALG00000038950	MUC2	PREDICTED: mucin-2 [Gallus gallus]	-	-	-	-	-	-	-
ENSGALG00000007878	DHSD	succinate dehydrogenase [ubiquinone] cytochrome b small subunit, mitochondrial [Gallus gallus]	Metabolism	Global and Overview;Carbohydrate metabolism;Energy metabolism	ko01100//Metabolic pathways;ko01110//Biosynthesis of secondary metabolites;ko01130//Biosynthesis of antibiotics;ko01120//Microbial metabolism in diverse environments;ko00190//Oxidative phosphorylation;ko01200//Carbon metabolism;ko00020//Citrate cycle (TCA cycle)	K00237	GO:0031224//intrinsic component of membrane;GO:0043229//intracellular organelle;GO:0005622//intracellular;GO:0043231//intracellular membrane-bounded organelle;GO:0031967//organelle envelope;GO:0044446//intracellular organelle part;GO:0043226//organelle;GO:0070469//respiratory chain;GO:0031975//envelope;GO:0005739//mitochondrion;GO:0019866//organelle inner membrane;GO:0005743//mitochondrial inner …	GO:0043169//cation binding;GO:0097159//organic cyclic compound binding;GO:0048037//cofactor binding;GO:1901363//heterocyclic compound binding;GO:0043167//ion binding;GO:0048038//quinone binding;GO:0005488//binding;GO:0046906//tetrapyrrole binding	GO:0009060//aerobic respiration;GO:0044699//single-organism process;GO:0044237//cellular metabolic process;GO:0006091//generation of precursor metabolites and energy;GO:0044710//single-organism metabolic process;GO:0055114//oxidation-reduction process;GO:0015980//energy derivation by oxidation of organic compounds;GO:0045333//cellular respiration;GO:0009987//cellular process;GO:0044763//single-or…
ENSGALG00000003547	SKP2	S-phase kinase-associated protein 2 [Gallus gallus]	Human Diseases;Genetic Information Processing;Cellular Processes;Environmental Information Processing	Cell growth and death;Folding, sorting and degradation;Infectious diseases;Signal transduction	ko05168//Herpes simplex infection;ko04120//Ubiquitin mediated proteolysis;ko04068//FoxO signaling pathway;ko04110//Cell cycle	K03875	GO:0031461//cullin-RING ubiquitin ligase complex;GO:0005623//cell;GO:0000151//ubiquitin ligase complex;GO:0044424//intracellular part;GO:1990234//transferase complex;GO:0043234//protein complex;GO:0005622//intracellular;GO:1902494//catalytic complex;GO:0032991//macromolecular complex;GO:0044464//cell part	GO:0005515//protein binding;GO:0016740//transferase activity;GO:0019787//ubiquitin-like protein transferase activity;GO:0016772//transferase activity, transferring phosphorus-containing groups;GO:0003824//catalytic activity;GO:0005488//binding	GO:0044763//single-organism cellular process;GO:0030163//protein catabolic process;GO:0032446//protein modification by small protein conjugation;GO:0044248//cellular catabolic process;GO:1901575//organic substance catabolic process;GO:0044257//cellular protein catabolic process;GO:0000278//mitotic cell cycle;GO:0009987//cellular process;GO:0043632//modification-dependent macromolecule catabolic p…
ENSGALG00000014736	KELL	PREDICTED: kell blood group glycoprotein homolog isoform X2 [Gallus gallus]	-	-	-	-	-	GO:0003824//catalytic activity;GO:0016787//hydrolase activity;GO:0070011//peptidase activity, acting on L-amino acid peptides;GO:0008233//peptidase activity;GO:0004175//endopeptidase activity	GO:0006508//proteolysis;GO:0071704//organic substance metabolic process;GO:0010467//gene expression;GO:0051604//protein maturation;GO:0044238//primary metabolic process;GO:0043170//macromolecule metabolic process;GO:0019538//protein metabolic process;GO:0016485//protein processing;GO:0008152//metabolic process
ENSGALG00000044765	SBP1	PREDICTED: selenium-binding protein 1-like isoform X4 [Gallus gallus]	-	-	-	-	-	-	-
ENSGALG00000042482	RAB5B	ras-related protein Rab-5B [Gallus gallus]	Cellular Processes	Transport and catabolism	ko04144//Endocytosis;ko04145//Phagosome	K07888	GO:0005769//early endosome;GO:0044444//cytoplasmic part;GO:0043227//membrane-bounded organelle;GO:0043226//organelle;GO:0005623//cell;GO:0044464//cell part;GO:0043229//intracellular organelle;GO:0005622//intracellular;GO:0031982//vesicle;GO:0005737//cytoplasm;GO:0043231//intracellular membrane-bounded organelle;GO:0031988//membrane-bounded vesicle;GO:0016023//cytoplasmic, membrane-bounded vesicle…	GO:0032550//purine ribonucleoside binding;GO:0097159//organic cyclic compound binding;GO:0036094//small molecule binding;GO:0001883//purine nucleoside binding;GO:1901363//heterocyclic compound binding;GO:0005488//binding;GO:0032549//ribonucleoside binding;GO:0097367//carbohydrate derivative binding;GO:0005515//protein binding;GO:0001882//nucleoside binding	GO:0051716//cellular response to stimulus;GO:0008104//protein localization;GO:0050896//response to stimulus;GO:0006996//organelle organization;GO:0044700//single organism signaling;GO:0033036//macromolecule localization;GO:0051179//localization;GO:0007154//cell communication;GO:0009987//cellular process;GO:0044763//single-organism cellular process;GO:0050789//regulation of biological process;GO:0…
ENSGALG00000037826	TESP1	PREDICTED: protein TESPA1 [Aquila chrysaetos canadensis]	-	-	-	-	-	-	-
ENSGALG00000014708	GSTK1	glutathione S-transferase kappa 1 [Gallus gallus]	Metabolism;Cellular Processes	Transport and catabolism;Metabolism of other amino acids;Xenobiotics biodegradation and metabolism	ko04146//Peroxisome;ko00480//Glutathione metabolism;ko00980//Metabolism of xenobiotics by cytochrome P450;ko00982//Drug metabolism - cytochrome P450	K13299	GO:0005622//intracellular;GO:0044422//organelle part;GO:0044444//cytoplasmic part;GO:0042579//microbody;GO:0016020//membrane;GO:0031975//envelope;GO:0043227//membrane-bounded organelle;GO:0019866//organelle inner membrane;GO:0044464//cell part;GO:0005737//cytoplasm;GO:0043229//intracellular organelle;GO:0031090//organelle membrane;GO:0044446//intracellular organelle part;GO:0043231//intracellular…	GO:0004601//peroxidase activity;GO:0005488//binding;GO:0015036//disulfide oxidoreductase activity;GO:0003824//catalytic activity;GO:0016765//transferase activity, transferring alkyl or aryl (other than methyl) groups;GO:0016209//antioxidant activity;GO:0016667//oxidoreductase activity, acting on a sulfur group of donors;GO:0016684//oxidoreductase activity, acting on peroxide as acceptor;GO:001674…	GO:0044237//cellular metabolic process;GO:0009987//cellular process;GO:0008152//metabolic process;GO:0044699//single-organism process;GO:0044710//single-organism metabolic process;GO:0006790//sulfur compound metabolic process
ENSGALG00000014877	EMB	embigin [Gallus gallus]	-	-	-	-	-	-	-
ENSGALG00000044725	IFNA1	PREDICTED: interferon type A1/A2-like [Gallus gallus]	Human Diseases;Cellular Processes;Organismal Systems;Environmental Information Processing	Signaling molecules and interaction;Signal transduction;Transport and catabolism;Immune system;Infectious diseases	ko04060//Cytokine-cytokine receptor interaction;ko05168//Herpes simplex infection;ko05164//Influenza A;ko04630//Jak-STAT signaling pathway;ko04620//Toll-like receptor signaling pathway;ko04622//RIG-I-like receptor signaling pathway;ko04623//Cytosolic DNA-sensing pathway;ko04140//Regulation of autophagy	K05414	-	-	-
ENSGALG00000038110	DGKA	PREDICTED: diacylglycerol kinase alpha [Alligator mississippiensis]	Metabolism;Environmental Information Processing	Signal transduction;Lipid metabolism;Global and Overview	ko01100//Metabolic pathways;ko01110//Biosynthesis of secondary metabolites;ko00564//Glycerophospholipid metabolism;ko04070//Phosphatidylinositol signaling system;ko00561//Glycerolipid metabolism	K00901	GO:0005737//cytoplasm;GO:0005623//cell;GO:0005622//intracellular;GO:0044444//cytoplasmic part;GO:0016020//membrane;GO:0044464//cell part;GO:0044424//intracellular part	GO:0032549//ribonucleoside binding;GO:0043167//ion binding;GO:0003824//catalytic activity;GO:0036094//small molecule binding;GO:0005488//binding;GO:0046872//metal ion binding;GO:0032550//purine ribonucleoside binding;GO:0043169//cation binding;GO:1901363//heterocyclic compound binding;GO:0016772//transferase activity, transferring phosphorus-containing groups;GO:0016301//kinase activity;GO:009715…	GO:0044237//cellular metabolic process;GO:0007186//G-protein coupled receptor signaling pathway;GO:0006793//phosphorus metabolic process;GO:0023052//signaling;GO:0050789//regulation of biological process;GO:0044699//single-organism process;GO:0009987//cellular process;GO:0008152//metabolic process;GO:0051716//cellular response to stimulus;GO:0065007//biological regulation;GO:0006796//phosphate-co…
ENSGALG00000007848	PTPS	PREDICTED: 6-pyruvoyl tetrahydrobiopterin synthase isoform X7 [Gallus gallus]	Metabolism	Global and Overview;Metabolism of cofactors and vitamins	ko01100//Metabolic pathways;ko00790//Folate biosynthesis	K01737	GO:0043231//intracellular membrane-bounded organelle;GO:0005622//intracellular;GO:0044424//intracellular part;GO:0043229//intracellular organelle;GO:0044464//cell part;GO:0043226//organelle;GO:0005623//cell;GO:0043227//membrane-bounded organelle	GO:0043169//cation binding;GO:0003824//catalytic activity;GO:0046983//protein dimerization activity;GO:0016835//carbon-oxygen lyase activity;GO:0005488//binding;GO:0043167//ion binding;GO:0016838//carbon-oxygen lyase activity, acting on phosphates;GO:0005515//protein binding;GO:0016829//lyase activity	GO:0006732//coenzyme metabolic process;GO:0051186//cofactor metabolic process;GO:0009058//biosynthetic process;GO:0009987//cellular process;GO:0009108//coenzyme biosynthetic process;GO:0044237//cellular metabolic process;GO:0008152//metabolic process;GO:0044249//cellular biosynthetic process;GO:0051188//cofactor biosynthetic process
ENSGALG00000038840	--	hypothetical protein AS27_01255, partial [Aptenodytes forsteri]	-	-	-	-	-	-	-
ENSGALG00000004903	CHST8	PREDICTED: carbohydrate sulfotransferase 8 [Anas platyrhynchos]	-	-	-	-	GO:0031224//intrinsic component of membrane;GO:0016020//membrane;GO:0044425//membrane part	GO:0016782//transferase activity, transferring sulfur-containing groups;GO:0003824//catalytic activity;GO:0016740//transferase activity	GO:0008152//metabolic process;GO:0044710//single-organism metabolic process;GO:0009058//biosynthetic process;GO:0044711//single-organism biosynthetic process;GO:0044699//single-organism process
ENSGALG00000033247	FMRF	Immunoglobulin G-binding protein A [Larimichthys crocea]	-	-	-	-	-	-	-
ENSGALG00000028305	IFNA1	interferon type A1/A2 precursor [Gallus gallus]	Human Diseases;Cellular Processes;Environmental Information Processing;Organismal Systems	Transport and catabolism;Immune system;Infectious diseases;Signaling molecules and interaction;Signal transduction	ko04060//Cytokine-cytokine receptor interaction;ko05168//Herpes simplex infection;ko05164//Influenza A;ko04630//Jak-STAT signaling pathway;ko04620//Toll-like receptor signaling pathway;ko04622//RIG-I-like receptor signaling pathway;ko04623//Cytosolic DNA-sensing pathway;ko04140//Regulation of autophagy	K05414	-	-	-
ENSGALG00000014746	TRPV6	PREDICTED: transient receptor potential cation channel subfamily V member 6 isoform X3 [Gallus gallus]	-	-	-	-	GO:0031224//intrinsic component of membrane;GO:0016020//membrane;GO:0044425//membrane part	GO:0022857//transmembrane transporter activity;GO:0022891//substrate-specific transmembrane transporter activity;GO:0022838//substrate-specific channel activity;GO:0005261//cation channel activity;GO:0015267//channel activity;GO:0005215//transporter activity;GO:0008324//cation transmembrane transporter activity;GO:0005216//ion channel activity;GO:0022892//substrate-specific transporter activity;G…	-
ENSGALG00000036365	POGZ	PREDICTED: pogo transposable element with ZNF domain isoform X3 [Gallus gallus]	-	-	-	-	-	GO:0043167//ion binding;GO:0003676//nucleic acid binding;GO:0043169//cation binding;GO:0097159//organic cyclic compound binding;GO:1901363//heterocyclic compound binding;GO:0005488//binding	-
ENSGALG00000005361	HPRT	PREDICTED: hypoxanthine-guanine phosphoribosyltransferase-like [Gallus gallus]	Metabolism	Xenobiotics biodegradation and metabolism;Global and Overview;Nucleotide metabolism	ko01100//Metabolic pathways;ko01110//Biosynthesis of secondary metabolites;ko00230//Purine metabolism;ko00983//Drug metabolism - other enzymes	K00760	GO:0044424//intracellular part;GO:0005623//cell;GO:0044464//cell part;GO:0005622//intracellular	GO:0003824//catalytic activity	GO:0006807//nitrogen compound metabolic process;GO:0034654//nucleobase-containing compound biosynthetic process;GO:1901362//organic cyclic compound biosynthetic process;GO:0044271//cellular nitrogen compound biosynthetic process;GO:0043101//purine-containing compound salvage;GO:1901576//organic substance biosynthetic process;GO:0043094//cellular metabolic compound salvage;GO:1901564//organonitrog…
ENSGALG00000028256	CCL19	chemokine (C-C motif) ligand 19 precursor [Gallus gallus]	Environmental Information Processing	Signaling molecules and interaction	ko04060//Cytokine-cytokine receptor interaction	K05512	-	GO:0005126//cytokine receptor binding;GO:0042379//chemokine receptor binding;GO:0005488//binding;GO:0048020//CCR chemokine receptor binding;GO:0005515//protein binding;GO:0005102//receptor binding;GO:0001664//G-protein coupled receptor binding;GO:0005125//cytokine activity	GO:0019222//regulation of metabolic process;GO:0044237//cellular metabolic process;GO:0080090//regulation of primary metabolic process;GO:0007154//cell communication;GO:0042306//regulation of protein import into nucleus;GO:0051049//regulation of transport;GO:0032844//regulation of homeostatic process;GO:0050795//regulation of behavior;GO:0051272//positive regulation of cellular component movement…
ENSGALG00000014939	RRF2M	PREDICTED: ribosome-releasing factor 2, mitochondrial isoform X2 [Gallus gallus]	-	-	-	-	GO:0005622//intracellular;GO:0043227//membrane-bounded organelle;GO:0044424//intracellular part;GO:0043229//intracellular organelle;GO:0005623//cell;GO:0043231//intracellular membrane-bounded organelle;GO:0044464//cell part;GO:0043226//organelle	GO:0016818//hydrolase activity, acting on acid anhydrides, in phosphorus-containing anhydrides;GO:0097367//carbohydrate derivative binding;GO:0016817//hydrolase activity, acting on acid anhydrides;GO:0016787//hydrolase activity;GO:0001883//purine nucleoside binding;GO:0017111//nucleoside-triphosphatase activity;GO:0032550//purine ribonucleoside binding;GO:0003824//catalytic activity;GO:0005488//b…	GO:0032988//ribonucleoprotein complex disassembly;GO:0034645//cellular macromolecule biosynthetic process;GO:1901576//organic substance biosynthetic process;GO:0006412//translation;GO:0043603//cellular amide metabolic process;GO:0043170//macromolecule metabolic process;GO:0044237//cellular metabolic process;GO:1901564//organonitrogen compound metabolic process;GO:0006518//peptide metabolic proces…
ENSGALG00000026912	IFNA1	PREDICTED: interferon type A1/A2-like [Gallus gallus]	Human Diseases;Cellular Processes;Environmental Information Processing;Organismal Systems	Transport and catabolism;Immune system;Infectious diseases;Signaling molecules and interaction;Signal transduction	ko04060//Cytokine-cytokine receptor interaction;ko05168//Herpes simplex infection;ko05164//Influenza A;ko04630//Jak-STAT signaling pathway;ko04620//Toll-like receptor signaling pathway;ko04622//RIG-I-like receptor signaling pathway;ko04623//Cytosolic DNA-sensing pathway;ko04140//Regulation of autophagy	K05414	-	-	-
ENSGALG00000015546	TBC14	PREDICTED: TBC1 domain family member 14 [Haliaeetus leucocephalus]	-	-	-	-	-	GO:0030695//GTPase regulator activity;GO:0030234//enzyme regulator activity;GO:0008047//enzyme activator activity;GO:0060589//nucleoside-triphosphatase regulator activity;GO:0005096//GTPase activator activity;GO:0098772//molecular function regulator	GO:0065007//biological regulation;GO:0043087//regulation of GTPase activity;GO:0050789//regulation of biological process;GO:0050790//regulation of catalytic activity;GO:0019222//regulation of metabolic process;GO:0051336//regulation of hydrolase activity;GO:0065009//regulation of molecular function
ENSGALG00000012594	NTRK2	BDNF/NT-3 growth factors receptor precursor [Gallus gallus]	Environmental Information Processing	Signal transduction	ko04010//MAPK signaling pathway	K04360	GO:0016020//membrane;GO:0044424//intracellular part;GO:0098589//membrane region;GO:0016021//integral component of membrane;GO:0005886//plasma membrane;GO:0033267//axon part;GO:0042995//cell projection;GO:0031224//intrinsic component of membrane;GO:0044444//cytoplasmic part;GO:0097060//synaptic membrane;GO:0044425//membrane part;GO:0044446//intracellular organelle part;GO:0043226//organelle;GO:009…	GO:0016740//transferase activity;GO:0004714//transmembrane receptor protein tyrosine kinase activity;GO:0016773//phosphotransferase activity, alcohol group as acceptor;GO:1901363//heterocyclic compound binding;GO:0004672//protein kinase activity;GO:0005488//binding;GO:0046983//protein dimerization activity;GO:0004871//signal transducer activity;GO:0097159//organic cyclic compound binding;GO:00973…	GO:0050794//regulation of cellular process;GO:0010941//regulation of cell death;GO:0048858//cell projection morphogenesis;GO:0007610//behavior;GO:0009887//organ morphogenesis;GO:0050790//regulation of catalytic activity;GO:0006928//movement of cell or subcellular component;GO:0046942//carboxylic acid transport;GO:0007169//transmembrane receptor protein tyrosine kinase signaling pathway;GO:0030900…
ENSGALG00000014832	AAPK1	5'-AMP-activated protein kinase catalytic subunit alpha-1 [Gallus gallus]	Human Diseases;Environmental Information Processing;Organismal Systems;Cellular Processes	Signal transduction;Transport and catabolism;Endocrine and metabolic diseases;Endocrine system	ko04068//FoxO signaling pathway;ko04910//Insulin signaling pathway;ko04931//Insulin resistance;ko04920//Adipocytokine signaling pathway;ko04150//mTOR signaling pathway;ko04140//Regulation of autophagy	K07198	GO:0044424//intracellular part;GO:0005623//cell;GO:0005622//intracellular;GO:0043226//organelle;GO:0043227//membrane-bounded organelle;GO:0043229//intracellular organelle;GO:0044464//cell part;GO:0043231//intracellular membrane-bounded organelle	GO:0004672//protein kinase activity;GO:1901363//heterocyclic compound binding;GO:0016773//phosphotransferase activity, alcohol group as acceptor;GO:0036094//small molecule binding;GO:0097159//organic cyclic compound binding;GO:0016301//kinase activity;GO:0004674//protein serine/threonine kinase activity;GO:0032550//purine ribonucleoside binding;GO:0016740//transferase activity;GO:0097367//carbohy…	GO:0042594//response to starvation;GO:0009987//cellular process;GO:0019220//regulation of phosphate metabolic process;GO:0048518//positive regulation of biological process;GO:0005996//monosaccharide metabolic process;GO:0007623//circadian rhythm;GO:0031667//response to nutrient levels;GO:0043085//positive regulation of catalytic activity;GO:0010604//positive regulation of macromolecule metabolic …
ENSGALG00000000905	PSB4	PREDICTED: proteasome subunit beta type-4 isoform X2 [Gallus gallus]	Genetic Information Processing	Folding, sorting and degradation	ko03050//Proteasome	K02736	GO:0005623//cell;GO:0044424//intracellular part;GO:0032991//macromolecular complex;GO:0043229//intracellular organelle;GO:0005622//intracellular;GO:0043227//membrane-bounded organelle;GO:0043226//organelle;GO:0043231//intracellular membrane-bounded organelle;GO:0043234//protein complex;GO:0044464//cell part;GO:0000502//proteasome complex	GO:0070011//peptidase activity, acting on L-amino acid peptides;GO:0016787//hydrolase activity;GO:0003824//catalytic activity;GO:0004175//endopeptidase activity;GO:0008233//peptidase activity	GO:0071704//organic substance metabolic process;GO:0006508//proteolysis;GO:0002376//immune system process;GO:0002437//inflammatory response to antigenic stimulus;GO:0044238//primary metabolic process;GO:0006954//inflammatory response;GO:0043170//macromolecule metabolic process;GO:0006955//immune response;GO:0006952//defense response;GO:0050896//response to stimulus;GO:0006950//response to stress;…
ENSGALG00000037665	LMBRL	PREDICTED: protein LMBR1L [Aquila chrysaetos canadensis]	-	-	-	-	-	-	-
ENSGALG00000028186	RERG	PREDICTED: ras-related and estrogen-regulated growth inhibitor [Struthio camelus australis]	-	-	-	-	GO:0043231//intracellular membrane-bounded organelle;GO:0044464//cell part;GO:0043229//intracellular organelle;GO:0043226//organelle;GO:0044424//intracellular part;GO:0005622//intracellular;GO:0043227//membrane-bounded organelle;GO:0005737//cytoplasm;GO:0044444//cytoplasmic part;GO:0005623//cell	GO:0035257//nuclear hormone receptor binding;GO:0003824//catalytic activity;GO:0016817//hydrolase activity, acting on acid anhydrides;GO:0005488//binding;GO:0001883//purine nucleoside binding;GO:0097367//carbohydrate derivative binding;GO:0016462//pyrophosphatase activity;GO:0001882//nucleoside binding;GO:0097159//organic cyclic compound binding;GO:0032549//ribonucleoside binding;GO:0017111//nucl…	GO:0072521//purine-containing compound metabolic process;GO:1901361//organic cyclic compound catabolic process;GO:0019637//organophosphate metabolic process;GO:0046483//heterocycle metabolic process;GO:0009150//purine ribonucleotide metabolic process;GO:0044712//single-organism catabolic process;GO:0009154//purine ribonucleotide catabolic process;GO:0044270//cellular nitrogen compound catabolic p…
ENSGALG00000005347	ATS18	PREDICTED: A disintegrin and metalloproteinase with thrombospondin motifs 18 isoform X2 [Gallus gallus]	-	-	-	-	GO:0031012//extracellular matrix	GO:0003824//catalytic activity;GO:0008233//peptidase activity;GO:0004175//endopeptidase activity;GO:0043167//ion binding;GO:0046872//metal ion binding;GO:0005488//binding;GO:0016787//hydrolase activity;GO:0046914//transition metal ion binding;GO:0070011//peptidase activity, acting on L-amino acid peptides;GO:0043169//cation binding	-
ENSGALG00000008005	FA65C	PREDICTED: protein FAM65C isoform X8 [Gallus gallus]	-	-	-	-	-	-	-
ENSGALG00000039997	FBP1	Fibropellin-1, partial [Columba livia]	-	-	-	-	-	-	-
ENSGALG00000014718	M3K1	PREDICTED: LOW QUALITY PROTEIN: mitogen-activated protein kinase kinase kinase 1 [Gallus gallus]	Organismal Systems;Environmental Information Processing;Genetic Information Processing	Signal transduction;Immune system;Folding, sorting and degradation;Endocrine system	ko04010//MAPK signaling pathway;ko04120//Ubiquitin mediated proteolysis;ko04912//GnRH signaling pathway;ko04622//RIG-I-like receptor signaling pathway	K04416	-	-	-
ENSGALG00000015540	RD23B	PREDICTED: UV excision repair protein RAD23 homolog B isoform X4 [Gallus gallus]	Genetic Information Processing	Replication and repair;Folding, sorting and degradation	ko04141//Protein processing in endoplasmic reticulum;ko03420//Nucleotide excision repair	K10839	GO:0032991//macromolecular complex;GO:0044422//organelle part;GO:0044464//cell part;GO:1990391//DNA repair complex;GO:0043227//membrane-bounded organelle;GO:0005634//nucleus;GO:0005623//cell;GO:0005622//intracellular;GO:0044424//intracellular part;GO:0043231//intracellular membrane-bounded organelle;GO:0043229//intracellular organelle;GO:0044446//intracellular organelle part;GO:0043234//protein c…	GO:0003676//nucleic acid binding;GO:0005515//protein binding;GO:0043130//ubiquitin binding;GO:0003677//DNA binding;GO:0032182//ubiquitin-like protein binding;GO:0005488//binding;GO:1901363//heterocyclic compound binding;GO:0097159//organic cyclic compound binding	GO:0048232//male gamete generation;GO:0019222//regulation of metabolic process;GO:0044265//cellular macromolecule catabolic process;GO:0006508//proteolysis;GO:0051603//proteolysis involved in cellular protein catabolic process;GO:0044702//single organism reproductive process;GO:1903362//regulation of cellular protein catabolic process;GO:0009057//macromolecule catabolic process;GO:0000003//reprod…
ENSGALG00000002439	BDP1	PREDICTED: transcription factor TFIIIB component B'' homolog isoform X4 [Gallus gallus]	-	-	-	-	-	-	-
ENSGALG00000007585	NIT1	PREDICTED: nitrilase homolog 1 isoformX4 [Gallus gallus]	-	-	-	-	-	GO:0003824//catalytic activity;GO:0016787//hydrolase activity	GO:0008152//metabolic process
ENSGALG00000010579	STON2	PREDICTED: stonin-2 isoform X6 [Gallus gallus]	-	-	-	-	GO:0044444//cytoplasmic part;GO:0031988//membrane-bounded vesicle;GO:0098796//membrane protein complex;GO:0044424//intracellular part;GO:0043234//protein complex;GO:0016023//cytoplasmic, membrane-bounded vesicle;GO:0005622//intracellular;GO:0043229//intracellular organelle;GO:0043231//intracellular membrane-bounded organelle;GO:0031410//cytoplasmic vesicle;GO:0043233//organelle lumen;GO:0032991//…	-	GO:0051179//localization;GO:0006897//endocytosis;GO:0008104//protein localization;GO:0006810//transport;GO:0033036//macromolecule localization;GO:0016192//vesicle-mediated transport;GO:0071702//organic substance transport;GO:0051234//establishment of localization;GO:0045184//establishment of protein localization;GO:0015031//protein transport
ENSGALG00000005509	DPYD	PREDICTED: dihydropyrimidine dehydrogenase [NADP(+)] isoform X2 [Gallus gallus]	Metabolism	Metabolism of cofactors and vitamins;Nucleotide metabolism;Global and Overview;Xenobiotics biodegradation and metabolism;Metabolism of other amino acids	ko01100//Metabolic pathways;ko00240//Pyrimidine metabolism;ko00983//Drug metabolism - other enzymes;ko00410//beta-Alanine metabolism;ko00770//Pantothenate and CoA biosynthesis	K00207	GO:0005623//cell;GO:0005622//intracellular;GO:0005737//cytoplasm;GO:0044424//intracellular part;GO:0044444//cytoplasmic part;GO:0044464//cell part	GO:0003824//catalytic activity;GO:0005488//binding;GO:0016635//oxidoreductase activity, acting on the CH-CH group of donors, quinone or related compound as acceptor;GO:0051540//metal cluster binding;GO:0004152//dihydroorotate dehydrogenase activity;GO:0016627//oxidoreductase activity, acting on the CH-CH group of donors;GO:0016491//oxidoreductase activity	GO:0034641//cellular nitrogen compound metabolic process;GO:0006753//nucleoside phosphate metabolic process;GO:0072527//pyrimidine-containing compound metabolic process;GO:0046700//heterocycle catabolic process;GO:0009156//ribonucleoside monophosphate biosynthetic process;GO:1901575//organic substance catabolic process;GO:0006208//pyrimidine nucleobase catabolic process;GO:0009174//pyrimidine rib…
ENSGALG00000043775	RPGF3	PREDICTED: rap guanine nucleotide exchange factor 3 [Gallus gallus]	Organismal Systems	Circulatory system	ko04261//Adrenergic signaling in cardiomyocytes	K08014	GO:0005622//intracellular;GO:0044424//intracellular part;GO:0005623//cell;GO:0044464//cell part	GO:0019887//protein kinase regulator activity;GO:0005088//Ras guanyl-nucleotide exchange factor activity;GO:0098772//molecular function regulator;GO:0005085//guanyl-nucleotide exchange factor activity;GO:0030234//enzyme regulator activity;GO:0019207//kinase regulator activity	GO:0051336//regulation of hydrolase activity;GO:0001944//vasculature development;GO:0019222//regulation of metabolic process;GO:0044699//single-organism process;GO:0048468//cell development;GO:0065009//regulation of molecular function;GO:0046683//response to organophosphorus;GO:0050789//regulation of biological process;GO:0001885//endothelial cell development;GO:0033043//regulation of organelle o…
ENSGALG00000028774	S10AA	protein S100-A10 [Gallus gallus]	-	-	-	-	GO:0016020//membrane;GO:0044425//membrane part;GO:0019898//extrinsic component of membrane	GO:0043167//ion binding;GO:0046872//metal ion binding;GO:0005488//binding;GO:0043169//cation binding	GO:0065009//regulation of molecular function;GO:0042221//response to chemical;GO:0001101//response to acid chemical;GO:0050896//response to stimulus;GO:0065007//biological regulation;GO:0044093//positive regulation of molecular function
ENSGALG00000002605	RM17	PREDICTED: 39S ribosomal protein L17, mitochondrial isoformX2 [Gallus gallus]	Genetic Information Processing	Translation	ko03010//Ribosome	K02879	GO:1990904//ribonucleoprotein complex;GO:0043227//membrane-bounded organelle;GO:0044422//organelle part;GO:0005622//intracellular;GO:0031090//organelle membrane;GO:0044424//intracellular part;GO:0031967//organelle envelope;GO:0019866//organelle inner membrane;GO:0043231//intracellular membrane-bounded organelle;GO:0044446//intracellular organelle part;GO:0031975//envelope;GO:0032991//macromolecul…	GO:0005515//protein binding;GO:0005198//structural molecule activity;GO:0005488//binding	GO:0010467//gene expression;GO:0008152//metabolic process;GO:0043170//macromolecule metabolic process;GO:0071704//organic substance metabolic process
ENSGALG00000002578	APH1A	PREDICTED: gamma-secretase subunit Aph-1b isoform X1 [Gallus gallus]	Environmental Information Processing	Signal transduction	ko04330//Notch signaling pathway	K06172	GO:0016020//membrane;GO:0044425//membrane part;GO:0031224//intrinsic component of membrane	-	GO:0043170//macromolecule metabolic process;GO:0019538//protein metabolic process;GO:0010467//gene expression;GO:0065007//biological regulation;GO:0071704//organic substance metabolic process;GO:0065009//regulation of molecular function;GO:0044238//primary metabolic process;GO:0051604//protein maturation;GO:0008152//metabolic process;GO:0044093//positive regulation of molecular function
ENSGALG00000033941	RORG	PREDICTED: nuclear receptor ROR-gamma [Aquila chrysaetos canadensis]	-	-	-	-	-	GO:0005488//binding	GO:0048856//anatomical structure development;GO:0044763//single-organism cellular process;GO:0002521//leukocyte differentiation;GO:0044767//single-organism developmental process;GO:0044237//cellular metabolic process;GO:0032502//developmental process;GO:0030098//lymphocyte differentiation;GO:0008152//metabolic process;GO:0043170//macromolecule metabolic process;GO:0098602//single organism cell ad…
ENSGALG00000014943	F169A	PREDICTED: soluble lamin-associated protein of 75 kDa isoform X2 [Gallus gallus]	-	-	-	-	-	-	-
ENSGALG00000014933	HEXB	PREDICTED: beta-hexosaminidase subunit beta [Gallus gallus]	Metabolism;Cellular Processes	Glycan biosynthesis and metabolism;Transport and catabolism;Global and Overview;Carbohydrate metabolism	ko01100//Metabolic pathways;ko04142//Lysosome;ko00520//Amino sugar and nucleotide sugar metabolism;ko00531//Glycosaminoglycan degradation;ko00511//Other glycan degradation;ko00604//Glycosphingolipid biosynthesis - ganglio series;ko00603//Glycosphingolipid biosynthesis - globo series	K12373	GO:0005622//intracellular;GO:0099503//secretory vesicle;GO:0043226//organelle;GO:0000323//lytic vacuole;GO:0044464//cell part;GO:0031988//membrane-bounded vesicle;GO:0044424//intracellular part;GO:0043229//intracellular organelle;GO:0043231//intracellular membrane-bounded organelle;GO:0030141//secretory granule;GO:0012505//endomembrane system;GO:0016023//cytoplasmic, membrane-bounded vesicle;GO:0…	GO:0046983//protein dimerization activity;GO:0005488//binding;GO:0005515//protein binding;GO:0016798//hydrolase activity, acting on glycosyl bonds;GO:0004553//hydrolase activity, hydrolyzing O-glycosyl compounds;GO:0016787//hydrolase activity;GO:0003824//catalytic activity;GO:0015929//hexosaminidase activity	GO:0051704//multi-organism process;GO:0019222//regulation of metabolic process;GO:0007618//mating;GO:0055080//cation homeostasis;GO:0006873//cellular ion homeostasis;GO:0006643//membrane lipid metabolic process;GO:0003008//system process;GO:0044710//single-organism metabolic process;GO:0044707//single-multicellular organism process;GO:0006664//glycolipid metabolic process;GO:0007610//behavior;GO:…
ENSGALG00000011484	CKLF8	CKLF-like MARVEL transmembrane domain-containing protein 8 [Gallus gallus]	-	-	-	-	GO:0031224//intrinsic component of membrane;GO:0044425//membrane part;GO:0016020//membrane	-	-
ENSGALG00000014872	FGF10	fibroblast growth factor 10 precursor [Gallus gallus]	Cellular Processes;Environmental Information Processing	Signal transduction;Cell motility	ko04010//MAPK signaling pathway;ko04810//Regulation of actin cytoskeleton	K04358	GO:0005576//extracellular region;GO:0005622//intracellular;GO:0043226//organelle;GO:0043227//membrane-bounded organelle;GO:0016020//membrane;GO:0044424//intracellular part;GO:0044464//cell part;GO:0043229//intracellular organelle;GO:0044421//extracellular region part;GO:0043231//intracellular membrane-bounded organelle;GO:0005623//cell	GO:0005488//binding;GO:0005104//fibroblast growth factor receptor binding;GO:0005515//protein binding;GO:0070851//growth factor receptor binding;GO:0005102//receptor binding;GO:0097367//carbohydrate derivative binding;GO:0005539//glycosaminoglycan binding	GO:1901099//negative regulation of signal transduction in absence of ligand;GO:0008544//epidermis development;GO:0048520//positive regulation of behavior;GO:0048771//tissue remodeling;GO:0007010//cytoskeleton organization;GO:0035295//tube development;GO:0002520//immune system development;GO:0001944//vasculature development;GO:0060495//cell-cell signaling involved in lung development;GO:0048562//e…
ENSGALG00000014942	NSA2	ribosome biogenesis protein NSA2 homolog [Gallus gallus]	-	-	-	-	GO:0043229//intracellular organelle;GO:0044428//nuclear part;GO:0031981//nuclear lumen;GO:0043231//intracellular membrane-bounded organelle;GO:0005634//nucleus;GO:0043227//membrane-bounded organelle;GO:0044464//cell part;GO:0044446//intracellular organelle part;GO:0032991//macromolecular complex;GO:0044424//intracellular part;GO:0005623//cell;GO:0070013//intracellular organelle lumen;GO:0043233//…	-	GO:0071840//cellular component organization or biogenesis;GO:0042254//ribosome biogenesis;GO:0044085//cellular component biogenesis;GO:0022613//ribonucleoprotein complex biogenesis
ENSGALG00000025984	IFNA1	interferon type A1/A2 precursor [Gallus gallus]	Organismal Systems;Environmental Information Processing;Cellular Processes;Human Diseases	Transport and catabolism;Infectious diseases;Immune system;Signaling molecules and interaction;Signal transduction	ko04060//Cytokine-cytokine receptor interaction;ko05168//Herpes simplex infection;ko05164//Influenza A;ko04630//Jak-STAT signaling pathway;ko04620//Toll-like receptor signaling pathway;ko04622//RIG-I-like receptor signaling pathway;ko04623//Cytosolic DNA-sensing pathway;ko04140//Regulation of autophagy	K05414	-	-	-
ENSGALG00000015257	GIN1	PREDICTED: gypsy retrotransposon integrase-like protein 1 [Gallus gallus]	-	-	-	-	-	GO:0097159//organic cyclic compound binding;GO:0005488//binding	GO:0044260//cellular macromolecule metabolic process;GO:0071704//organic substance metabolic process;GO:0044237//cellular metabolic process;GO:0043170//macromolecule metabolic process;GO:0090304//nucleic acid metabolic process;GO:0006139//nucleobase-containing compound metabolic process;GO:0006725//cellular aromatic compound metabolic process;GO:0044238//primary metabolic process;GO:0008152//meta…
ENSGALG00000044396	IFNA1	interferon type A1/A2 precursor [Gallus gallus]	Organismal Systems;Environmental Information Processing;Cellular Processes;Human Diseases	Transport and catabolism;Infectious diseases;Immune system;Signal transduction;Signaling molecules and interaction	ko04060//Cytokine-cytokine receptor interaction;ko05168//Herpes simplex infection;ko05164//Influenza A;ko04630//Jak-STAT signaling pathway;ko04620//Toll-like receptor signaling pathway;ko04622//RIG-I-like receptor signaling pathway;ko04623//Cytosolic DNA-sensing pathway;ko04140//Regulation of autophagy	K05414	-	-	-
ENSGALG00000005848	I11RA	interleukin-11 receptor subunit alpha precursor [Gallus gallus]	Environmental Information Processing	Signaling molecules and interaction;Signal transduction	ko04060//Cytokine-cytokine receptor interaction;ko04630//Jak-STAT signaling pathway	K05056	-	GO:0004871//signal transducer activity;GO:0038023//signaling receptor activity;GO:0004888//transmembrane signaling receptor activity;GO:0060089//molecular transducer activity;GO:0004872//receptor activity;GO:0099600//transmembrane receptor activity	-
ENSGALG00000007874	IL18	interleukin-18 [Gallus gallus]	Organismal Systems;Environmental Information Processing;Human Diseases	Infectious diseases;Immune system;Signaling molecules and interaction	ko04060//Cytokine-cytokine receptor interaction;ko05164//Influenza A;ko05132//Salmonella infection;ko04623//Cytosolic DNA-sensing pathway;ko04621//NOD-like receptor signaling pathway	K05482	GO:0005576//extracellular region;GO:0044421//extracellular region part	GO:0005515//protein binding;GO:0005102//receptor binding;GO:0005488//binding	GO:0022407//regulation of cell-cell adhesion;GO:0032944//regulation of mononuclear cell proliferation;GO:0090087//regulation of peptide transport;GO:0007154//cell communication;GO:0010467//gene expression;GO:0050863//regulation of T cell activation;GO:0034112//positive regulation of homotypic cell-cell adhesion;GO:0048522//positive regulation of cellular process;GO:0002682//regulation of immune s…
ENSGALG00000046169	WIBG	PREDICTED: partner of Y14 and mago-like [Gallus gallus]	Genetic Information Processing	Translation	ko03013//RNA transport;ko03015//mRNA surveillance pathway	K14294	GO:0043231//intracellular membrane-bounded organelle;GO:0043226//organelle;GO:0043227//membrane-bounded organelle;GO:0005622//intracellular;GO:0043229//intracellular organelle;GO:0032991//macromolecular complex;GO:0005623//cell;GO:0043234//protein complex;GO:0044464//cell part;GO:0044424//intracellular part	GO:0003676//nucleic acid binding;GO:0044877//macromolecular complex binding;GO:0003723//RNA binding;GO:0005488//binding;GO:0097159//organic cyclic compound binding;GO:1901363//heterocyclic compound binding;GO:0043021//ribonucleoprotein complex binding	GO:0019538//protein metabolic process;GO:0034655//nucleobase-containing compound catabolic process;GO:0034645//cellular macromolecule biosynthetic process;GO:0044267//cellular protein metabolic process;GO:0016071//mRNA metabolic process;GO:0006725//cellular aromatic compound metabolic process;GO:0044238//primary metabolic process;GO:0009057//macromolecule catabolic process;GO:0009056//catabolic p…
ENSGALG00000007885	PIHD2	PREDICTED: PIH1 domain-containing protein 2 isoform X2 [Gallus gallus]	-	-	-	-	-	-	-
ENSGALG00000027785	CCBE1	PREDICTED: collagen and calcium-binding EGF domain-containing protein 1 isoform X1 [Gallus gallus]	-	-	-	-	-	GO:0005488//binding;GO:0005515//protein binding	GO:0032879//regulation of localization;GO:0040012//regulation of locomotion;GO:0065007//biological regulation;GO:0050794//regulation of cellular process;GO:0051239//regulation of multicellular organismal process;GO:0030334//regulation of cell migration;GO:0051270//regulation of cellular component movement;GO:0010594//regulation of endothelial cell migration;GO:0050789//regulation of biological pr…
ENSGALG00000032955	TUFT1	PREDICTED: tuftelin isoform X2 [Meleagris gallopavo]	-	-	-	-	-	-	-
ENSGALG00000010562	CE128	PREDICTED: centrosomal protein of 128 kDa isoform X5 [Gallus gallus]	-	-	-	-	GO:0015630//microtubule cytoskeleton;GO:0005813//centrosome;GO:0043232//intracellular non-membrane-bounded organelle;GO:0043228//non-membrane-bounded organelle;GO:0005623//cell;GO:0005622//intracellular;GO:0044430//cytoskeletal part;GO:0044446//intracellular organelle part;GO:0005815//microtubule organizing center;GO:0005856//cytoskeleton;GO:0043226//organelle;GO:0044424//intracellular part;GO:00…	-	-
ENSGALG00000033510	ERBB3	receptor tyrosine-protein kinase erbB-3 precursor [Gallus gallus]	Environmental Information Processing;Cellular Processes	Transport and catabolism;Signal transduction	ko04144//Endocytosis;ko04020//Calcium signaling pathway;ko04012//ErbB signaling pathway	K05084	GO:0016020//membrane;GO:0044459//plasma membrane part;GO:0044464//cell part;GO:0005623//cell;GO:0071944//cell periphery;GO:0043234//protein complex;GO:0032991//macromolecular complex;GO:0044425//membrane part;GO:0005886//plasma membrane	GO:0036094//small molecule binding;GO:0038023//signaling receptor activity;GO:0016301//kinase activity;GO:0097159//organic cyclic compound binding;GO:0004713//protein tyrosine kinase activity;GO:0004871//signal transducer activity;GO:0005488//binding;GO:0004872//receptor activity;GO:0005515//protein binding;GO:0003824//catalytic activity;GO:0016772//transferase activity, transferring phosphorus-c…	GO:0006468//protein phosphorylation;GO:0071704//organic substance metabolic process;GO:0023052//signaling;GO:0007167//enzyme linked receptor protein signaling pathway;GO:0048523//negative regulation of cellular process;GO:0048856//anatomical structure development;GO:0044238//primary metabolic process;GO:0044260//cellular macromolecule metabolic process;GO:0050794//regulation of cellular process;G…
ENSGALG00000023089	SSBP2	PREDICTED: single-stranded DNA-binding protein 2 isoform X1 [Gallus gallus]	-	-	-	-	GO:0043229//intracellular organelle;GO:0043226//organelle;GO:0043231//intracellular membrane-bounded organelle;GO:0044424//intracellular part;GO:0005622//intracellular;GO:0043227//membrane-bounded organelle;GO:0005623//cell;GO:0044464//cell part	GO:0043566//structure-specific DNA binding;GO:0097159//organic cyclic compound binding;GO:0005488//binding;GO:1901363//heterocyclic compound binding;GO:0003677//DNA binding;GO:0003676//nucleic acid binding	GO:1901360//organic cyclic compound metabolic process;GO:0071704//organic substance metabolic process;GO:1901576//organic substance biosynthetic process;GO:0090304//nucleic acid metabolic process;GO:0043170//macromolecule metabolic process;GO:0008152//metabolic process;GO:0032774//RNA biosynthetic process;GO:0044237//cellular metabolic process;GO:0016070//RNA metabolic process;GO:0018130//heteroc…
ENSGALG00000037611	MYO3A	PREDICTED: myosin-IIIa isoform X6 [Gallus gallus]	-	-	-	-	-	-	-
ENSGALG00000015156	NRK1	PREDICTED: nicotinamide riboside kinase 1 isoform X1 [Gallus gallus]	Metabolism	Metabolism of cofactors and vitamins;Global and Overview	ko01100//Metabolic pathways;ko00760//Nicotinate and nicotinamide metabolism	K10524	-	-	-
ENSGALG00000014516	CPEB2	PREDICTED: cytoplasmic polyadenylation element-binding protein 2 isoform X3 [Chrysemys picta bellii]	Cellular Processes;Organismal Systems	Cell growth and death;Endocrine system;Development	ko04114//Oocyte meiosis;ko04914//Progesterone-mediated oocyte maturation;ko04320//Dorso-ventral axis formation	K02602	GO:0005623//cell;GO:0043227//membrane-bounded organelle;GO:0044424//intracellular part;GO:1990904//ribonucleoprotein complex;GO:0030529//intracellular ribonucleoprotein complex;GO:0043226//organelle;GO:0043229//intracellular organelle;GO:0005622//intracellular;GO:0044464//cell part;GO:0043231//intracellular membrane-bounded organelle;GO:0032991//macromolecular complex	GO:0005488//binding;GO:1901363//heterocyclic compound binding;GO:0044877//macromolecular complex binding;GO:0098772//molecular function regulator;GO:0043021//ribonucleoprotein complex binding;GO:0003730//mRNA 3'-UTR binding;GO:0036094//small molecule binding;GO:0003723//RNA binding;GO:0030234//enzyme regulator activity;GO:0003727//single-stranded RNA binding;GO:0003729//mRNA binding;GO:0045182//t…	GO:0006979//response to oxidative stress;GO:0043087//regulation of GTPase activity;GO:0010629//negative regulation of gene expression;GO:0009892//negative regulation of metabolic process;GO:0065007//biological regulation;GO:0009628//response to abiotic stimulus;GO:0043434//response to peptide hormone;GO:0050789//regulation of biological process;GO:0032269//negative regulation of cellular protein …
ENSGALG00000000048	VATA	PREDICTED: V-type proton ATPase catalytic subunit A-like isoform X1 [Gallus gallus]	Metabolism;Cellular Processes	Transport and catabolism;Energy metabolism;Global and Overview	ko01100//Metabolic pathways;ko04145//Phagosome;ko00190//Oxidative phosphorylation	K02145	GO:0098796//membrane protein complex;GO:0016469//proton-transporting two-sector ATPase complex;GO:0032991//macromolecular complex;GO:0016020//membrane;GO:0033176//proton-transporting V-type ATPase complex;GO:0044425//membrane part;GO:0043234//protein complex	GO:0036094//small molecule binding;GO:0022891//substrate-specific transmembrane transporter activity;GO:0001882//nucleoside binding;GO:0015078//hydrogen ion transmembrane transporter activity;GO:0015077//monovalent inorganic cation transmembrane transporter activity;GO:0097159//organic cyclic compound binding;GO:0005215//transporter activity;GO:0032549//ribonucleoside binding;GO:0008324//cation t…	GO:0098660//inorganic ion transmembrane transport;GO:0044699//single-organism process;GO:0015988//energy coupled proton transmembrane transport, against electrochemical gradient;GO:0051234//establishment of localization;GO:0009117//nucleotide metabolic process;GO:0006753//nucleoside phosphate metabolic process;GO:1901564//organonitrogen compound metabolic process;GO:0009150//purine ribonucleotide…
ENSGALG00000040687	SNX27	sorting nexin-27 [Gallus gallus]	-	-	-	-	GO:0044424//intracellular part;GO:0005737//cytoplasm;GO:0043234//protein complex;GO:0032991//macromolecular complex;GO:0044444//cytoplasmic part;GO:0044464//cell part;GO:0005768//endosome;GO:0071944//cell periphery;GO:0043226//organelle;GO:0044459//plasma membrane part;GO:0005623//cell;GO:0005769//early endosome;GO:0005622//intracellular;GO:0016020//membrane;GO:0043227//membrane-bounded organelle…	GO:1901981//phosphatidylinositol phosphate binding;GO:0008289//lipid binding;GO:0043168//anion binding;GO:0035091//phosphatidylinositol binding;GO:0005543//phospholipid binding;GO:0043167//ion binding;GO:0005488//binding	GO:0007041//lysosomal transport;GO:0044765//single-organism transport;GO:0051641//cellular localization;GO:0071702//organic substance transport;GO:0051649//establishment of localization in cell;GO:0009987//cellular process;GO:0016192//vesicle-mediated transport;GO:0015031//protein transport;GO:0046907//intracellular transport;GO:0051179//localization;GO:0033036//macromolecule localization;GO:1902…
ENSGALG00000015737	NCAM2	PREDICTED: neural cell adhesion molecule 2 isoform X6 [Gallus gallus]	Environmental Information Processing	Signaling molecules and interaction	ko04514//Cell adhesion molecules (CAMs)	K06491	-	-	-
ENSGALG00000027875	IFNA1	PREDICTED: interferon type A1/A2-like [Gallus gallus]	Environmental Information Processing;Organismal Systems;Cellular Processes;Human Diseases	Signal transduction;Signaling molecules and interaction;Transport and catabolism;Infectious diseases;Immune system	ko04060//Cytokine-cytokine receptor interaction;ko05168//Herpes simplex infection;ko05164//Influenza A;ko04630//Jak-STAT signaling pathway;ko04620//Toll-like receptor signaling pathway;ko04622//RIG-I-like receptor signaling pathway;ko04623//Cytosolic DNA-sensing pathway;ko04140//Regulation of autophagy	K05414	-	-	-
ENSGALG00000013085	PTPRO	receptor-type tyrosine-protein phosphatase O [Gallus gallus]	-	-	-	-	GO:0036477//somatodendritic compartment;GO:0042995//cell projection;GO:0030425//dendrite;GO:0005886//plasma membrane;GO:0044459//plasma membrane part;GO:0097458//neuron part;GO:0044464//cell part;GO:0005623//cell;GO:0043005//neuron projection;GO:0044425//membrane part;GO:0016020//membrane;GO:0071944//cell periphery	GO:0046983//protein dimerization activity;GO:0042578//phosphoric ester hydrolase activity;GO:0005515//protein binding;GO:0003824//catalytic activity;GO:0016791//phosphatase activity;GO:0004721//phosphoprotein phosphatase activity;GO:0005488//binding;GO:0016787//hydrolase activity;GO:0016788//hydrolase activity, acting on ester bonds	GO:0009968//negative regulation of signal transduction;GO:0048585//negative regulation of response to stimulus;GO:0072001//renal system development;GO:0044237//cellular metabolic process;GO:0007043//cell-cell junction assembly;GO:0023051//regulation of signaling;GO:0007399//nervous system development;GO:0048856//anatomical structure development;GO:0003071//renal system process involved in regulat…
ENSGALG00000010572	TSHR	thyrotropin receptor isoform 1 precursor [Gallus gallus]	Environmental Information Processing	Signaling molecules and interaction	ko04080//Neuroactive ligand-receptor interaction	K04249	GO:0016020//membrane;GO:0031224//intrinsic component of membrane;GO:0044425//membrane part	GO:0060089//molecular transducer activity;GO:0099600//transmembrane receptor activity;GO:0004930//G-protein coupled receptor activity;GO:0016500//protein-hormone receptor activity;GO:0038023//signaling receptor activity;GO:0004888//transmembrane signaling receptor activity;GO:0004872//receptor activity;GO:0004871//signal transducer activity	GO:0030154//cell differentiation;GO:0030098//lymphocyte differentiation;GO:0044707//single-multicellular organism process;GO:0002376//immune system process;GO:0051716//cellular response to stimulus;GO:0007610//behavior;GO:0048589//developmental growth;GO:0048731//system development;GO:0048513//animal organ development;GO:0002521//leukocyte differentiation;GO:0044700//single organism signaling;GO:…
ENSGALG00000003558	NAKD2	PREDICTED: NAD kinase domain-containing protein 1, mitochondrial isoform X2 [Gallus gallus]	Metabolism	Global and Overview;Metabolism of cofactors and vitamins	ko01100//Metabolic pathways;ko00760//Nicotinate and nicotinamide metabolism	K00858	GO:0044464//cell part;GO:0043227//membrane-bounded organelle;GO:0005623//cell;GO:0044424//intracellular part;GO:0043231//intracellular membrane-bounded organelle;GO:0043229//intracellular organelle;GO:0005622//intracellular;GO:0043226//organelle	GO:0016301//kinase activity;GO:0005515//protein binding;GO:0016772//transferase activity, transferring phosphorus-containing groups;GO:0016740//transferase activity;GO:0003824//catalytic activity;GO:0005488//binding;GO:0046983//protein dimerization activity	GO:0006733//oxidoreduction coenzyme metabolic process;GO:0034641//cellular nitrogen compound metabolic process;GO:0044238//primary metabolic process;GO:0006739//NADP metabolic process;GO:0006725//cellular aromatic compound metabolic process;GO:0072524//pyridine-containing compound metabolic process;GO:0044710//single-organism metabolic process;GO:0044699//single-organism process;GO:0006732//coenz…
ENSGALG00000032991	PARP8	PREDICTED: poly [ADP-ribose] polymerase 8 isoformX1 [Gallus gallus]	-	-	-	-	GO:0044464//cell part;GO:0005623//cell	GO:0003824//catalytic activity;GO:0016740//transferase activity;GO:0016763//transferase activity, transferring pentosyl groups;GO:0016757//transferase activity, transferring glycosyl groups	-
ENSGALG00000030730	NOL6	PREDICTED: nucleolar protein 6 isoform X1 [Gallus gallus]	Genetic Information Processing	Translation	ko03008//Ribosome biogenesis in eukaryotes	K14544	-	-	-
ENSGALG00000015154	TRPM6	PREDICTED: transient receptor potential cation channel subfamily M member 6 [Gallus gallus]	-	-	-	-	-	-	-
ENSGALG00000007882	CK057	Chromosome 11 open reading frame 57 [Homo sapiens]	-	-	-	-	-	-	-
ENSGALG00000012575	TLE1	PREDICTED: transducin-like enhancer protein 1 isoformX2 [Gallus gallus]	-	-	-	-	GO:0043229//intracellular organelle;GO:0043231//intracellular membrane-bounded organelle;GO:0043234//protein complex;GO:0043227//membrane-bounded organelle;GO:0005623//cell;GO:0043226//organelle;GO:0005737//cytoplasm;GO:0005622//intracellular;GO:0032991//macromolecular complex;GO:0044444//cytoplasmic part;GO:0044424//intracellular part;GO:0044464//cell part	GO:0003712//transcription cofactor activity;GO:0001104//RNA polymerase II transcription cofactor activity;GO:0005488//binding;GO:0001076//transcription factor activity, RNA polymerase II transcription factor binding;GO:0000989//transcription factor activity, transcription factor binding;GO:0000988//transcription factor activity, protein binding;GO:0005515//protein binding	GO:0097659//nucleic acid-templated transcription;GO:0043067//regulation of programmed cell death;GO:0035556//intracellular signal transduction;GO:0006366//transcription from RNA polymerase II promoter;GO:0044699//single-organism process;GO:0043170//macromolecule metabolic process;GO:0019438//aromatic compound biosynthetic process;GO:0006351//transcription, DNA-templated;GO:0032774//RNA biosynthet…
ENSGALG00000030506	T2R40	PREDICTED: taste receptor type 2 member 40-like [Gallus gallus]	-	-	-	-	GO:0044425//membrane part;GO:0031224//intrinsic component of membrane;GO:0016020//membrane	GO:0038023//signaling receptor activity;GO:0060089//molecular transducer activity;GO:0099600//transmembrane receptor activity;GO:0004872//receptor activity;GO:0004871//signal transducer activity;GO:0004888//transmembrane signaling receptor activity	GO:0050896//response to stimulus;GO:0065007//biological regulation;GO:0050789//regulation of biological process;GO:0044763//single-organism cellular process;GO:0050877//neurological system process;GO:0009987//cellular process;GO:0044699//single-organism process;GO:0032501//multicellular organismal process;GO:0007166//cell surface receptor signaling pathway;GO:0007606//sensory perception of chemic…
ENSGALG00000014833	RL37	60S ribosomal protein L37 [Taeniopygia guttata]	Genetic Information Processing	Translation	ko03010//Ribosome	K02922	GO:0044424//intracellular part;GO:0043228//non-membrane-bounded organelle;GO:0044422//organelle part;GO:0043229//intracellular organelle;GO:0015934//large ribosomal subunit;GO:0005840//ribosome;GO:1990904//ribonucleoprotein complex;GO:0044446//intracellular organelle part;GO:0005622//intracellular;GO:0043232//intracellular non-membrane-bounded organelle;GO:0044391//ribosomal subunit;GO:0044444//c…	GO:1901363//heterocyclic compound binding;GO:0097159//organic cyclic compound binding;GO:0043169//cation binding;GO:0003723//RNA binding;GO:0005488//binding;GO:0043167//ion binding;GO:0003676//nucleic acid binding;GO:0005198//structural molecule activity	GO:0043170//macromolecule metabolic process;GO:0071704//organic substance metabolic process;GO:0010467//gene expression;GO:0008152//metabolic process
ENSGALG00000031707	DHH	PREDICTED: desert hedgehog protein, partial [Meleagris gallopavo]	Environmental Information Processing	Signal transduction	ko04340//Hedgehog signaling pathway	K11990	GO:0016020//membrane	GO:0005515//protein binding;GO:0005102//receptor binding;GO:0003824//catalytic activity;GO:0046914//transition metal ion binding;GO:0046872//metal ion binding;GO:0005488//binding;GO:0043167//ion binding;GO:0016787//hydrolase activity;GO:0043169//cation binding	GO:0044763//single-organism cellular process;GO:0007281//germ cell development;GO:0050896//response to stimulus;GO:0006629//lipid metabolic process;GO:0007165//signal transduction;GO:0032501//multicellular organismal process;GO:0048856//anatomical structure development;GO:0043170//macromolecule metabolic process;GO:0044238//primary metabolic process;GO:0030908//protein splicing;GO:0019953//sexual…
ENSGALG00000000234	E41LA	PREDICTED: erythrocyte membrane protein band 4.1 like 4A isoform X2 [Gallus gallus]	-	-	-	-	GO:0005623//cell;GO:0043228//non-membrane-bounded organelle;GO:0043232//intracellular non-membrane-bounded organelle;GO:0044464//cell part;GO:0043226//organelle;GO:0044424//intracellular part;GO:0005622//intracellular;GO:0043229//intracellular organelle	-	-
ENSGALG00000002430	SMN	survival motor neuron protein [Gallus gallus]	Genetic Information Processing	Translation	ko03013//RNA transport	K13129	GO:0043231//intracellular membrane-bounded organelle;GO:0043227//membrane-bounded organelle;GO:0044464//cell part;GO:0005623//cell;GO:0005622//intracellular;GO:0043229//intracellular organelle;GO:0043226//organelle;GO:0044424//intracellular part	GO:1901363//heterocyclic compound binding;GO:0005488//binding;GO:0003676//nucleic acid binding;GO:0097159//organic cyclic compound binding	GO:0032989//cellular component morphogenesis;GO:0043170//macromolecule metabolic process;GO:0046483//heterocycle metabolic process;GO:0044763//single-organism cellular process;GO:0007275//multicellular organism development;GO:0044767//single-organism developmental process;GO:0009987//cellular process;GO:0007399//nervous system development;GO:0048731//system development;GO:0048699//generation of n…
ENSGALG00000015451	ZN462	PREDICTED: zinc finger protein 462 isoform X12 [Gallus gallus]	-	-	-	-	GO:0005622//intracellular;GO:0005623//cell;GO:0043229//intracellular organelle;GO:0043226//organelle;GO:0043227//membrane-bounded organelle;GO:0044424//intracellular part;GO:0043231//intracellular membrane-bounded organelle;GO:0044464//cell part	GO:0005488//binding;GO:0043169//cation binding;GO:0043167//ion binding	GO:0044271//cellular nitrogen compound biosynthetic process;GO:0032774//RNA biosynthetic process;GO:0044238//primary metabolic process;GO:0018130//heterocycle biosynthetic process;GO:0065007//biological regulation;GO:0046483//heterocycle metabolic process;GO:0006139//nucleobase-containing compound metabolic process;GO:0071840//cellular component organization or biogenesis;GO:0006996//organelle or…
ENSGALG00000027714	ATG10	PREDICTED: autophagy related 10 [Gallus gallus]	Cellular Processes	Transport and catabolism	ko04140//Regulation of autophagy	K17888	GO:0044464//cell part;GO:0005623//cell	GO:0003824//catalytic activity;GO:0016740//transferase activity;GO:0019787//ubiquitin-like protein transferase activity	GO:0043170//macromolecule metabolic process;GO:0043412//macromolecule modification;GO:0008152//metabolic process;GO:0019538//protein metabolic process;GO:0044238//primary metabolic process;GO:0006914//autophagy;GO:0070647//protein modification by small protein conjugation or removal;GO:0036211//protein modification process;GO:0006464//cellular protein modification process;GO:0009987//cellular pro…
ENSGALG00000002358	CDO1	PREDICTED: cysteine dioxygenase type 1 [Gallus gallus]	Metabolism	Amino acid metabolism;Metabolism of other amino acids;Global and Overview	ko01100//Metabolic pathways;ko00270//Cysteine and methionine metabolism;ko00430//Taurine and hypotaurine metabolism	K00456	GO:0005737//cytoplasm;GO:0005622//intracellular;GO:0044464//cell part;GO:0005623//cell;GO:0044444//cytoplasmic part;GO:0044424//intracellular part	GO:0046914//transition metal ion binding;GO:0043169//cation binding;GO:0016702//oxidoreductase activity, acting on single donors with incorporation of molecular oxygen, incorporation of two atoms of oxygen;GO:0043167//ion binding;GO:0046872//metal ion binding;GO:0016701//oxidoreductase activity, acting on single donors with incorporation of molecular oxygen;GO:0016491//oxidoreductase activity;GO:…	GO:0000096//sulfur amino acid metabolic process;GO:0071704//organic substance metabolic process;GO:0006520//cellular amino acid metabolic process;GO:0006790//sulfur compound metabolic process;GO:0006082//organic acid metabolic process;GO:0044237//cellular metabolic process;GO:1901564//organonitrogen compound metabolic process;GO:0044763//single-organism cellular process;GO:0009987//cellular proce…
[truncated: 83 more rows]
