# Supplementary material for: Genomic Variations and Signatures of Selection in Wuhua Yellow Chicken
Source: Preprints.org preprint supplement (doi:10.20944/preprints202006.0089.v1), 2020-06-07
Supplement: Supplementary file 8 [file Table S7.xlsx]

## Sheet: Table S7
Table S7-32 loci were shared in the three groups
GeneID	Symbol	Description	KEGG_A_class	KEGG_B_class	Pathway	K_ID	GO Component	GO Function	GO Process
ENSGALG00000026594	HS3S5	PREDICTED: heparan sulfate glucosamine 3-O-sulfotransferase 5 isoform X6 [Gallus gallus]	Metabolism	Glycan biosynthesis and metabolism	ko00534//Glycosaminoglycan biosynthesis - heparan sulfate / heparin	K08104	-	GO:0003824//catalytic activity;GO:0016782//transferase activity, transferring sulfur-containing groups;GO:0008146//sulfotransferase activity;GO:0034483//heparan sulfate sulfotransferase activity;GO:0016740//transferase activity	GO:0008152//metabolic process;GO:0009101//glycoprotein biosynthetic process;GO:0044699//single-organism process;GO:0044710//single-organism metabolic process;GO:0044272//sulfur compound biosynthetic process;GO:0044711//single-organism biosynthetic process;GO:0006790//sulfur compound metabolic process;GO:0052126//movement in host environment;GO:0032501//multicellular organismal process;GO:0051828/…
ENSGALG00000015589	MSH3	PREDICTED: DNA mismatch repair protein Msh3 isoform X1 [Gallus gallus]	Genetic Information Processing	Replication and repair	ko03430//Mismatch repair	K08736	GO:0043234//protein complex;GO:0005623//cell;GO:0044464//cell part;GO:0032991//macromolecular complex;GO:0044424//intracellular part;GO:0005622//intracellular;GO:1990391//DNA repair complex;GO:0032300//mismatch repair complex	GO:0005488//binding;GO:0097367//carbohydrate derivative binding;GO:0003684//damaged DNA binding;GO:0097159//organic cyclic compound binding;GO:0001882//nucleoside binding;GO:0005515//protein binding;GO:1901363//heterocyclic compound binding;GO:0032549//ribonucleoside binding;GO:0032550//purine ribonucleoside binding;GO:0003690//double-stranded DNA binding;GO:0003677//DNA binding;GO:0032356//oxidi…	GO:0002200//somatic diversification of immune receptors;GO:0060255//regulation of macromolecule metabolic process;GO:0002520//immune system development;GO:0033554//cellular response to stress;GO:0016444//somatic cell DNA recombination;GO:0006725//cellular aromatic compound metabolic process;GO:0006950//response to stress;GO:0006996//organelle organization;GO:0048731//system development;GO:0034641…
ENSGALG00000014736	KELL	PREDICTED: kell blood group glycoprotein homolog isoform X2 [Gallus gallus]	-	-	-	-	-	GO:0003824//catalytic activity;GO:0016787//hydrolase activity;GO:0070011//peptidase activity, acting on L-amino acid peptides;GO:0008233//peptidase activity;GO:0004175//endopeptidase activity	GO:0006508//proteolysis;GO:0071704//organic substance metabolic process;GO:0010467//gene expression;GO:0051604//protein maturation;GO:0044238//primary metabolic process;GO:0043170//macromolecule metabolic process;GO:0019538//protein metabolic process;GO:0016485//protein processing;GO:0008152//metabolic process
ENSGALG00000037826	TESP1	PREDICTED: protein TESPA1 [Aquila chrysaetos canadensis]	-	-	-	-	-	-	-
ENSGALG00000033247	FMRF	Immunoglobulin G-binding protein A [Larimichthys crocea]	-	-	-	-	-	-	-
ENSGALG00000014746	TRPV6	PREDICTED: transient receptor potential cation channel subfamily V member 6 isoform X3 [Gallus gallus]	-	-	-	-	GO:0031224//intrinsic component of membrane;GO:0016020//membrane;GO:0044425//membrane part	GO:0022857//transmembrane transporter activity;GO:0022891//substrate-specific transmembrane transporter activity;GO:0022838//substrate-specific channel activity;GO:0005261//cation channel activity;GO:0015267//channel activity;GO:0005215//transporter activity;GO:0008324//cation transmembrane transporter activity;GO:0005216//ion channel activity;GO:0022892//substrate-specific transporter activity;G…	-
ENSGALG00000005361	HPRT	PREDICTED: hypoxanthine-guanine phosphoribosyltransferase-like [Gallus gallus]	Metabolism	Xenobiotics biodegradation and metabolism;Global and Overview;Nucleotide metabolism	ko01100//Metabolic pathways;ko01110//Biosynthesis of secondary metabolites;ko00230//Purine metabolism;ko00983//Drug metabolism - other enzymes	K00760	GO:0044424//intracellular part;GO:0005623//cell;GO:0044464//cell part;GO:0005622//intracellular	GO:0003824//catalytic activity	GO:0006807//nitrogen compound metabolic process;GO:0034654//nucleobase-containing compound biosynthetic process;GO:1901362//organic cyclic compound biosynthetic process;GO:0044271//cellular nitrogen compound biosynthetic process;GO:0043101//purine-containing compound salvage;GO:1901576//organic substance biosynthetic process;GO:0043094//cellular metabolic compound salvage;GO:1901564//organonitrog…
ENSGALG00000012594	NTRK2	BDNF/NT-3 growth factors receptor precursor [Gallus gallus]	Environmental Information Processing	Signal transduction	ko04010//MAPK signaling pathway	K04360	GO:0016020//membrane;GO:0044424//intracellular part;GO:0098589//membrane region;GO:0016021//integral component of membrane;GO:0005886//plasma membrane;GO:0033267//axon part;GO:0042995//cell projection;GO:0031224//intrinsic component of membrane;GO:0044444//cytoplasmic part;GO:0097060//synaptic membrane;GO:0044425//membrane part;GO:0044446//intracellular organelle part;GO:0043226//organelle;GO:009…	GO:0016740//transferase activity;GO:0004714//transmembrane receptor protein tyrosine kinase activity;GO:0016773//phosphotransferase activity, alcohol group as acceptor;GO:1901363//heterocyclic compound binding;GO:0004672//protein kinase activity;GO:0005488//binding;GO:0046983//protein dimerization activity;GO:0004871//signal transducer activity;GO:0097159//organic cyclic compound binding;GO:00973…	GO:0050794//regulation of cellular process;GO:0010941//regulation of cell death;GO:0048858//cell projection morphogenesis;GO:0007610//behavior;GO:0009887//organ morphogenesis;GO:0050790//regulation of catalytic activity;GO:0006928//movement of cell or subcellular component;GO:0046942//carboxylic acid transport;GO:0007169//transmembrane receptor protein tyrosine kinase signaling pathway;GO:0030900…
ENSGALG00000037665	LMBRL	PREDICTED: protein LMBR1L [Aquila chrysaetos canadensis]	-	-	-	-	-	-	-
ENSGALG00000005347	ATS18	PREDICTED: A disintegrin and metalloproteinase with thrombospondin motifs 18 isoform X2 [Gallus gallus]	-	-	-	-	GO:0031012//extracellular matrix	GO:0003824//catalytic activity;GO:0008233//peptidase activity;GO:0004175//endopeptidase activity;GO:0043167//ion binding;GO:0046872//metal ion binding;GO:0005488//binding;GO:0016787//hydrolase activity;GO:0046914//transition metal ion binding;GO:0070011//peptidase activity, acting on L-amino acid peptides;GO:0043169//cation binding	-
ENSGALG00000015540	RD23B	PREDICTED: UV excision repair protein RAD23 homolog B isoform X4 [Gallus gallus]	Genetic Information Processing	Replication and repair;Folding, sorting and degradation	ko04141//Protein processing in endoplasmic reticulum;ko03420//Nucleotide excision repair	K10839	GO:0032991//macromolecular complex;GO:0044422//organelle part;GO:0044464//cell part;GO:1990391//DNA repair complex;GO:0043227//membrane-bounded organelle;GO:0005634//nucleus;GO:0005623//cell;GO:0005622//intracellular;GO:0044424//intracellular part;GO:0043231//intracellular membrane-bounded organelle;GO:0043229//intracellular organelle;GO:0044446//intracellular organelle part;GO:0043234//protein c…	GO:0003676//nucleic acid binding;GO:0005515//protein binding;GO:0043130//ubiquitin binding;GO:0003677//DNA binding;GO:0032182//ubiquitin-like protein binding;GO:0005488//binding;GO:1901363//heterocyclic compound binding;GO:0097159//organic cyclic compound binding	GO:0048232//male gamete generation;GO:0019222//regulation of metabolic process;GO:0044265//cellular macromolecule catabolic process;GO:0006508//proteolysis;GO:0051603//proteolysis involved in cellular protein catabolic process;GO:0044702//single organism reproductive process;GO:1903362//regulation of cellular protein catabolic process;GO:0009057//macromolecule catabolic process;GO:0000003//reprod…
ENSGALG00000043775	RPGF3	PREDICTED: rap guanine nucleotide exchange factor 3 [Gallus gallus]	Organismal Systems	Circulatory system	ko04261//Adrenergic signaling in cardiomyocytes	K08014	GO:0005622//intracellular;GO:0044424//intracellular part;GO:0005623//cell;GO:0044464//cell part	GO:0019887//protein kinase regulator activity;GO:0005088//Ras guanyl-nucleotide exchange factor activity;GO:0098772//molecular function regulator;GO:0005085//guanyl-nucleotide exchange factor activity;GO:0030234//enzyme regulator activity;GO:0019207//kinase regulator activity	GO:0051336//regulation of hydrolase activity;GO:0001944//vasculature development;GO:0019222//regulation of metabolic process;GO:0044699//single-organism process;GO:0048468//cell development;GO:0065009//regulation of molecular function;GO:0046683//response to organophosphorus;GO:0050789//regulation of biological process;GO:0001885//endothelial cell development;GO:0033043//regulation of organelle o…
ENSGALG00000012575	TLE1	PREDICTED: transducin-like enhancer protein 1 isoformX2 [Gallus gallus]	-	-	-	-	GO:0043229//intracellular organelle;GO:0043231//intracellular membrane-bounded organelle;GO:0043234//protein complex;GO:0043227//membrane-bounded organelle;GO:0005623//cell;GO:0043226//organelle;GO:0005737//cytoplasm;GO:0005622//intracellular;GO:0032991//macromolecular complex;GO:0044444//cytoplasmic part;GO:0044424//intracellular part;GO:0044464//cell part	GO:0003712//transcription cofactor activity;GO:0001104//RNA polymerase II transcription cofactor activity;GO:0005488//binding;GO:0001076//transcription factor activity, RNA polymerase II transcription factor binding;GO:0000989//transcription factor activity, transcription factor binding;GO:0000988//transcription factor activity, protein binding;GO:0005515//protein binding	GO:0097659//nucleic acid-templated transcription;GO:0043067//regulation of programmed cell death;GO:0035556//intracellular signal transduction;GO:0006366//transcription from RNA polymerase II promoter;GO:0044699//single-organism process;GO:0043170//macromolecule metabolic process;GO:0019438//aromatic compound biosynthetic process;GO:0006351//transcription, DNA-templated;GO:0032774//RNA biosynthet…
ENSGALG00000030506	T2R40	PREDICTED: taste receptor type 2 member 40-like [Gallus gallus]	-	-	-	-	GO:0044425//membrane part;GO:0031224//intrinsic component of membrane;GO:0016020//membrane	GO:0038023//signaling receptor activity;GO:0060089//molecular transducer activity;GO:0099600//transmembrane receptor activity;GO:0004872//receptor activity;GO:0004871//signal transducer activity;GO:0004888//transmembrane signaling receptor activity	GO:0050896//response to stimulus;GO:0065007//biological regulation;GO:0050789//regulation of biological process;GO:0044763//single-organism cellular process;GO:0050877//neurological system process;GO:0009987//cellular process;GO:0044699//single-organism process;GO:0032501//multicellular organismal process;GO:0007166//cell surface receptor signaling pathway;GO:0007606//sensory perception of chemic…
ENSGALG00000031707	DHH	PREDICTED: desert hedgehog protein, partial [Meleagris gallopavo]	Environmental Information Processing	Signal transduction	ko04340//Hedgehog signaling pathway	K11990	GO:0016020//membrane	GO:0005515//protein binding;GO:0005102//receptor binding;GO:0003824//catalytic activity;GO:0046914//transition metal ion binding;GO:0046872//metal ion binding;GO:0005488//binding;GO:0043167//ion binding;GO:0016787//hydrolase activity;GO:0043169//cation binding	GO:0044763//single-organism cellular process;GO:0007281//germ cell development;GO:0050896//response to stimulus;GO:0006629//lipid metabolic process;GO:0007165//signal transduction;GO:0032501//multicellular organismal process;GO:0048856//anatomical structure development;GO:0043170//macromolecule metabolic process;GO:0044238//primary metabolic process;GO:0030908//protein splicing;GO:0019953//sexual…
ENSGALG00000000234	E41LA	PREDICTED: erythrocyte membrane protein band 4.1 like 4A isoform X2 [Gallus gallus]	-	-	-	-	GO:0005623//cell;GO:0043228//non-membrane-bounded organelle;GO:0043232//intracellular non-membrane-bounded organelle;GO:0044464//cell part;GO:0043226//organelle;GO:0044424//intracellular part;GO:0005622//intracellular;GO:0043229//intracellular organelle	-	-
ENSGALG00000015598	RGRF2	PREDICTED: ras-specific guanine nucleotide-releasing factor 2 isoform X1 [Gallus gallus]	Environmental Information Processing	Signal transduction	ko04010//MAPK signaling pathway	K12326	GO:0044424//intracellular part;GO:0005623//cell;GO:0005622//intracellular;GO:0044464//cell part	GO:0098772//molecular function regulator;GO:0005088//Ras guanyl-nucleotide exchange factor activity;GO:0005085//guanyl-nucleotide exchange factor activity	GO:0044763//single-organism cellular process;GO:0050896//response to stimulus;GO:0044700//single organism signaling;GO:0050794//regulation of cellular process;GO:0044699//single-organism process;GO:0007154//cell communication;GO:0050789//regulation of biological process;GO:0065007//biological regulation;GO:0023052//signaling;GO:0009987//cellular process;GO:0007165//signal transduction;GO:0051716/…
ENSGALG00000026928	KLF4	PREDICTED: Krueppel-like factor 4 isoform X2 [Gallus gallus]	-	-	-	-	GO:0005623//cell;GO:0043226//organelle;GO:0005694//chromosome;GO:0005622//intracellular;GO:0044464//cell part;GO:0043232//intracellular non-membrane-bounded organelle;GO:0000785//chromatin;GO:0043229//intracellular organelle;GO:0032991//macromolecular complex;GO:0044427//chromosomal part;GO:0044424//intracellular part;GO:0043228//non-membrane-bounded organelle;GO:0044446//intracellular organelle …	GO:0000989//transcription factor activity, transcription factor binding;GO:0000976//transcription regulatory region sequence-specific DNA binding;GO:0008134//transcription factor binding;GO:0003690//double-stranded DNA binding;GO:0003676//nucleic acid binding;GO:0001134//transcription factor activity, transcription factor recruiting;GO:0043565//sequence-specific DNA binding;GO:0044212//transcript…	GO:0050896//response to stimulus;GO:0008152//metabolic process;GO:0001818//negative regulation of cytokine production;GO:0006366//transcription from RNA polymerase II promoter;GO:0050789//regulation of biological process;GO:0009893//positive regulation of metabolic process;GO:0031326//regulation of cellular biosynthetic process;GO:0009891//positive regulation of biosynthetic process;GO:0051171//r…
ENSGALG00000040266	GLI3	transcriptional activator GLI3 [Gallus gallus]	Environmental Information Processing	Signal transduction	ko04340//Hedgehog signaling pathway	K06230	GO:0044428//nuclear part;GO:0044446//intracellular organelle part;GO:0031981//nuclear lumen;GO:0005623//cell;GO:0031974//membrane-enclosed lumen;GO:0043227//membrane-bounded organelle;GO:0005622//intracellular;GO:0043233//organelle lumen;GO:0044444//cytoplasmic part;GO:0044451//nucleoplasm part;GO:0032991//macromolecular complex;GO:0043231//intracellular membrane-bounded organelle;GO:0044464//cel…	GO:0001071//nucleic acid binding transcription factor activity;GO:0005515//protein binding;GO:0003677//DNA binding;GO:0043167//ion binding;GO:0097159//organic cyclic compound binding;GO:1901363//heterocyclic compound binding;GO:0043169//cation binding;GO:0003676//nucleic acid binding;GO:0019899//enzyme binding;GO:0005488//binding	GO:0007420//brain development;GO:0051251//positive regulation of lymphocyte activation;GO:1903707//negative regulation of hemopoiesis;GO:0043009//chordate embryonic development;GO:0030178//negative regulation of Wnt signaling pathway;GO:0042476//odontogenesis;GO:0007423//sensory organ development;GO:0048663//neuron fate commitment;GO:0045619//regulation of lymphocyte differentiation;GO:0034613//c…
ENSGALG00000012595	CBPC1	cytosolic carboxypeptidase 1 [Gallus gallus]	-	-	-	-	GO:0016471//vacuolar proton-transporting V-type ATPase complex;GO:0043226//organelle;GO:0043234//protein complex;GO:0043227//membrane-bounded organelle;GO:0005737//cytoplasm;GO:0098805//whole membrane;GO:0044424//intracellular part;GO:0044437//vacuolar part;GO:0044446//intracellular organelle part;GO:0098588//bounding membrane of organelle;GO:0005623//cell;GO:0005774//vacuolar membrane;GO:0032991…	GO:0005515//protein binding;GO:0008324//cation transmembrane transporter activity;GO:0043167//ion binding;GO:0043169//cation binding;GO:0008092//cytoskeletal protein binding;GO:0016787//hydrolase activity;GO:0008237//metallopeptidase activity;GO:0005215//transporter activity;GO:0022892//substrate-specific transporter activity;GO:0008235//metalloexopeptidase activity;GO:0022891//substrate-specific…	GO:0015992//proton transport;GO:0065008//regulation of biological quality;GO:0044260//cellular macromolecule metabolic process;GO:0007275//multicellular organism development;GO:0048513//animal organ development;GO:0071840//cellular component organization or biogenesis;GO:0015988//energy coupled proton transmembrane transport, against electrochemical gradient;GO:0007417//central nervous system dev…
ENSGALG00000034306	NDF4	neurogenic differentiation factor 4 [Gallus gallus]	-	-	-	-	GO:0044464//cell part;GO:0043231//intracellular membrane-bounded organelle;GO:0043226//organelle;GO:0005622//intracellular;GO:0005623//cell;GO:0043227//membrane-bounded organelle;GO:0044424//intracellular part;GO:0043229//intracellular organelle	GO:0005488//binding;GO:1901363//heterocyclic compound binding;GO:0097159//organic cyclic compound binding;GO:0003676//nucleic acid binding;GO:0005515//protein binding	GO:0051716//cellular response to stimulus;GO:0048869//cellular developmental process;GO:0007154//cell communication;GO:0007423//sensory organ development;GO:0006807//nitrogen compound metabolic process;GO:0009059//macromolecule biosynthetic process;GO:1901360//organic cyclic compound metabolic process;GO:0044707//single-multicellular organism process;GO:0032502//developmental process;GO:0008152//…
ENSGALG00000015770	A4	amyloid beta A4 protein precursor [Gallus gallus]	-	-	-	-	GO:0043227//membrane-bounded organelle;GO:0043228//non-membrane-bounded organelle;GO:0043226//organelle;GO:0016020//membrane;GO:0005856//cytoskeleton;GO:0043232//intracellular non-membrane-bounded organelle;GO:0097458//neuron part;GO:0005623//cell;GO:0042995//cell projection;GO:0044424//intracellular part;GO:0005819//spindle;GO:0031982//vesicle;GO:0044430//cytoskeletal part;GO:0044444//cytoplasmi…	GO:0030234//enzyme regulator activity;GO:0005539//glycosaminoglycan binding;GO:0005102//receptor binding;GO:0005515//protein binding;GO:0004866//endopeptidase inhibitor activity;GO:0061134//peptidase regulator activity;GO:0098772//molecular function regulator;GO:0043167//ion binding;GO:0046872//metal ion binding;GO:0004857//enzyme inhibitor activity;GO:0061135//endopeptidase regulator activity;GO…	GO:0050801//ion homeostasis;GO:0006935//chemotaxis;GO:0048469//cell maturation;GO:0032774//RNA biosynthetic process;GO:0006807//nitrogen compound metabolic process;GO:0044770//cell cycle phase transition;GO:0031123//RNA 3'-end processing;GO:0051716//cellular response to stimulus;GO:0044703//multi-organism reproductive process;GO:0090304//nucleic acid metabolic process;GO:0009653//anatomical struc…
ENSGALG00000002539	KCNN2	small conductance calcium-activated potassium channel protein 2 [Gallus gallus]	-	-	-	-	GO:0036477//somatodendritic compartment;GO:0042383//sarcolemma;GO:0031224//intrinsic component of membrane;GO:0005622//intracellular;GO:0044425//membrane part;GO:0043229//intracellular organelle;GO:0097458//neuron part;GO:0043232//intracellular non-membrane-bounded organelle;GO:0012505//endomembrane system;GO:0042995//cell projection;GO:0044464//cell part;GO:0005886//plasma membrane;GO:0005623//c…	GO:0042805//actinin binding;GO:0022836//gated channel activity;GO:0022857//transmembrane transporter activity;GO:0022838//substrate-specific channel activity;GO:0005267//potassium channel activity;GO:0022891//substrate-specific transmembrane transporter activity;GO:0022892//substrate-specific transporter activity;GO:0005215//transporter activity;GO:0015077//monovalent inorganic cation transmembra…	GO:0050794//regulation of cellular process;GO:0032879//regulation of localization;GO:0044699//single-organism process;GO:0051234//establishment of localization;GO:0050789//regulation of biological process;GO:0006810//transport;GO:0065007//biological regulation;GO:0043269//regulation of ion transport;GO:0006811//ion transport;GO:0051049//regulation of transport;GO:0034765//regulation of ion transm…
ENSGALG00000039970	ENDOU	PREDICTED: poly(U)-specific endoribonuclease [Gallus gallus]	-	-	-	-	-	GO:0060089//molecular transducer activity;GO:0016787//hydrolase activity;GO:0001871//pattern binding;GO:0005488//binding;GO:0003824//catalytic activity;GO:0038024//cargo receptor activity;GO:0004872//receptor activity	GO:0051179//localization;GO:0051234//establishment of localization;GO:0006897//endocytosis;GO:0002376//immune system process;GO:0016192//vesicle-mediated transport;GO:0006810//transport
ENSGALG00000043112	RPB1	PREDICTED: LOW QUALITY PROTEIN: DNA-directed RNA polymerase II subunit RPB1-like [Latimeria chalumnae]	Human Diseases;Metabolism;Genetic Information Processing	Infectious diseases;Transcription;Global and Overview;Nucleotide metabolism	ko01100//Metabolic pathways;ko05168//Herpes simplex infection;ko00230//Purine metabolism;ko00240//Pyrimidine metabolism;ko03020//RNA polymerase	K03006	-	-	-
ENSGALG00000031702	KMT2D	PREDICTED: LOW QUALITY PROTEIN: histone-lysine N-methyltransferase MLL2, partial [Gallus gallus]	Metabolism	Amino acid metabolism	ko00310//Lysine degradation	K09187	-	GO:0043169//cation binding;GO:0005488//binding;GO:0046872//metal ion binding;GO:0016740//transferase activity;GO:0003824//catalytic activity;GO:0043167//ion binding	GO:0051716//cellular response to stimulus;GO:0007165//signal transduction;GO:0043170//macromolecule metabolic process;GO:0008152//metabolic process;GO:0007154//cell communication;GO:0009987//cellular process;GO:0023052//signaling;GO:0044238//primary metabolic process;GO:0050789//regulation of biological process;GO:0050896//response to stimulus;GO:0044763//single-organism cellular process;GO:00442…
ENSGALG00000035501	KMT2D	Histone-lysine N-methyltransferase 2D, partial [Charadrius vociferus]	Metabolism	Amino acid metabolism	ko00310//Lysine degradation	K09187	GO:0043227//membrane-bounded organelle;GO:0044424//intracellular part;GO:1990234//transferase complex;GO:0043234//protein complex;GO:0005622//intracellular;GO:0043229//intracellular organelle;GO:1902494//catalytic complex;GO:0044464//cell part;GO:0032991//macromolecular complex;GO:0005623//cell;GO:0043231//intracellular membrane-bounded organelle;GO:0043226//organelle;GO:0034708//methyltransferas…	GO:0046872//metal ion binding;GO:0008276//protein methyltransferase activity;GO:1901363//heterocyclic compound binding;GO:0097159//organic cyclic compound binding;GO:0016279//protein-lysine N-methyltransferase activity;GO:0003824//catalytic activity;GO:0005488//binding;GO:0036094//small molecule binding;GO:0016740//transferase activity;GO:0008170//N-methyltransferase activity;GO:0003677//DNA bind…	GO:0010468//regulation of gene expression;GO:0009059//macromolecule biosynthetic process;GO:0046434//organophosphate catabolic process;GO:0044270//cellular nitrogen compound catabolic process;GO:0044699//single-organism process;GO:0007292//female gamete generation;GO:0044703//multi-organism reproductive process;GO:1902589//single-organism organelle organization;GO:0044238//primary metabolic proce…
ENSGALG00000036282	AAKG1	5'-AMP-activated protein kinase gamma-1 non-catalytic subunit variant 1 [Gallus gallus]	Environmental Information Processing;Organismal Systems;Human Diseases	Signal transduction;Endocrine and metabolic diseases;Endocrine system	ko04068//FoxO signaling pathway;ko04910//Insulin signaling pathway;ko04931//Insulin resistance;ko04920//Adipocytokine signaling pathway	K07200	GO:0044464//cell part;GO:0043227//membrane-bounded organelle;GO:0005622//intracellular;GO:0043229//intracellular organelle;GO:0044424//intracellular part;GO:0005623//cell;GO:0043231//intracellular membrane-bounded organelle;GO:0043226//organelle	GO:0097159//organic cyclic compound binding;GO:1901265//nucleoside phosphate binding;GO:0017076//purine nucleotide binding;GO:0036094//small molecule binding;GO:1901363//heterocyclic compound binding;GO:0000166//nucleotide binding;GO:0005488//binding	GO:0044267//cellular protein metabolic process;GO:0006464//cellular protein modification process;GO:0036211//protein modification process;GO:0010467//gene expression;GO:0071704//organic substance metabolic process;GO:0009987//cellular process;GO:0019538//protein metabolic process;GO:0043412//macromolecule modification;GO:0044238//primary metabolic process;GO:0044260//cellular macromolecule metabo…
ENSGALG00000031971	CNTP2	PREDICTED: contactin-associated protein-like 2 isoform X1 [Meleagris gallopavo]	Environmental Information Processing	Signaling molecules and interaction	ko04514//Cell adhesion molecules (CAMs)	K07380	GO:0044425//membrane part;GO:0031224//intrinsic component of membrane;GO:0016020//membrane	-	GO:0022610//biological adhesion
ENSGALG00000036054	NIPLB	PREDICTED: nucleolar protein 58-like [Chaetura pelagica]	-	-	-	-	-	-	-
ENSGALG00000037953	TBA1B	tubulin alpha-1B chain [Mus musculus]	Cellular Processes	Cellular commiunity;Transport and catabolism	ko04145//Phagosome;ko04540//Gap junction	K07374	GO:0043229//intracellular organelle;GO:0005874//microtubule;GO:0044430//cytoskeletal part;GO:0015630//microtubule cytoskeleton;GO:0044464//cell part;GO:0044446//intracellular organelle part;GO:0005856//cytoskeleton;GO:0044422//organelle part;GO:0044424//intracellular part;GO:0099512//supramolecular fiber;GO:0099513//polymeric cytoskeletal fiber;GO:0005623//cell;GO:0043228//non-membrane-bounded or…	GO:0001882//nucleoside binding;GO:0003723//RNA binding;GO:0003676//nucleic acid binding;GO:0017111//nucleoside-triphosphatase activity;GO:0001883//purine nucleoside binding;GO:0032549//ribonucleoside binding;GO:0016817//hydrolase activity, acting on acid anhydrides;GO:0003824//catalytic activity;GO:0097159//organic cyclic compound binding;GO:0036094//small molecule binding;GO:0005488//binding;GO:…	GO:1901565//organonitrogen compound catabolic process;GO:0034655//nucleobase-containing compound catabolic process;GO:0071840//cellular component organization or biogenesis;GO:0070670//response to interleukin-4;GO:0009150//purine ribonucleotide metabolic process;GO:0006163//purine nucleotide metabolic process;GO:0046700//heterocycle catabolic process;GO:0044270//cellular nitrogen compound catabol…
ENSGALG00000015184	TLE4	transducin-like enhancer protein 4 [Gallus gallus]	-	-	-	-	GO:0044428//nuclear part;GO:0070013//intracellular organelle lumen;GO:0005623//cell;GO:0044464//cell part;GO:0043231//intracellular membrane-bounded organelle;GO:0043229//intracellular organelle;GO:0044424//intracellular part;GO:0031974//membrane-enclosed lumen;GO:0005622//intracellular;GO:0044422//organelle part;GO:0044446//intracellular organelle part;GO:0005634//nucleus;GO:0043233//organelle l…	GO:0003700//transcription factor activity, sequence-specific DNA binding;GO:0005515//protein binding;GO:0003712//transcription cofactor activity;GO:0005488//binding;GO:0000989//transcription factor activity, transcription factor binding;GO:0008134//transcription factor binding;GO:0000988//transcription factor activity, protein binding;GO:0001071//nucleic acid binding transcription factor activity…	GO:0008152//metabolic process;GO:0050794//regulation of cellular process;GO:0006807//nitrogen compound metabolic process;GO:0097659//nucleic acid-templated transcription;GO:1901576//organic substance biosynthetic process;GO:0044699//single-organism process;GO:0019438//aromatic compound biosynthetic process;GO:0009059//macromolecule biosynthetic process;GO:0032774//RNA biosynthetic process;GO:1901…
